# Supplementary material
Source: publisher site journal article supplement (https://www.spandidos-publications.com/7463/downloadSupplementary)
Supplement: Supplementary file 1 [file downloadSupplementary]

## Sheet: tmp
Table SIV. Differentially expressed genes between the gastric cancer and normal tissues from GSE54129 cohort.
Genes	logFC	t	P.Value	adj.P.Val	B	Changea
BANF1	3.12621	49.5631	2.14844e-87	4.48208e-83	187.02	Up-regulated
PCGF1	2.71193	40.9403	4.54381e-77	4.73964e-73	164.299	Up-regulated
TRAPPC1	2.9879	40.3971	2.34107e-76	1.62798e-72	162.718	Up-regulated
SNX27	2.76447	34.8151	1.5585e-68	8.12838e-65	145.249	Up-regulated
SPTAN1	3.12595	30.7637	3.40504e-62	1.42072e-58	130.981	Up-regulated
EGR1	5.90164	29.5375	3.77435e-60	1.31234e-56	126.361	Up-regulated
ERI3	2.22379	29.4866	4.60475e-60	1.37235e-56	126.166	Up-regulated
RAP2A	2.89917	28.273	5.65184e-58	1.47386e-54	121.438	Up-regulated
AP2M1	1.91991	27.9119	2.43406e-57	5.64214e-54	120.002	Up-regulated
NAPA	1.87872	27.7378	4.94571e-57	1.03177e-53	119.304	Up-regulated
FKBP1A	2.05284	26.9587	1.22635e-55	2.32583e-52	116.142	Up-regulated
PKM	3.83284	26.8754	1.73458e-55	3.01557e-52	115.8	Up-regulated
PPP3R1	-1.90952	-26.5116	7.96876e-55	1.2788e-51	114.298	Down-regulated
NEAT1	2.91126	25.4252	8.24769e-53	1.22902e-49	109.721	Up-regulated
MAP4K3-DT	-1.8921	-25.2279	1.94261e-52	2.70178e-49	108.875	Down-regulated
ZNF548	1.52569	25.1805	2.38911e-52	3.11509e-49	108.671	Up-regulated
VSTM2A	-1.99546	-24.784	1.35718e-51	1.6655e-48	106.956	Down-regulated
NUCB1	2.02297	23.7574	1.32743e-49	1.53849e-46	102.427	Up-regulated
UBAP2L	1.99742	23.4559	5.2211e-49	5.63401e-46	101.073	Up-regulated
AGO2	2.16303	23.4484	5.40122e-49	5.63401e-46	101.039	Up-regulated
PSME3	2.08961	23.3992	6.76295e-49	6.71851e-46	100.817	Up-regulated
NCKAP5	-2.12948	-22.8222	9.62338e-48	9.12559e-45	98.1895	Down-regulated
AAAS	1.11556	22.3375	9.23869e-47	8.37989e-44	95.9505	Up-regulated
MORC2-AS1	1.56843	22.1482	2.25223e-46	1.95775e-43	95.0682	Up-regulated
NSUN6	-1.99432	-22.0232	4.06583e-46	3.39285e-43	94.4832	Down-regulated
FAM186A	-1.22734	-21.6137	2.8555e-45	2.29121e-42	92.5524	Down-regulated
ENPP6	-1.50906	-21.5183	4.51203e-45	3.4863e-42	92.0991	Down-regulated
TRIP10	2.04198	21.4352	6.72464e-45	5.01034e-42	91.7037	Up-regulated
TGFB1	3.29355	21.2709	1.48424e-44	1.06773e-41	90.9191	Up-regulated
PCAT18	-2.45616	-21.176	2.34837e-44	1.63306e-41	90.4644	Down-regulated
AGAP9	-1.46026	-21.102	3.35949e-44	2.26083e-41	90.1095	Down-regulated
YWHAH	-1.78344	-21.0816	3.70957e-44	2.41841e-41	90.0113	Down-regulated
COCH	2.26001	20.8752	1.01248e-43	6.40075e-41	89.016	Up-regulated
SALL1	-2.27303	-20.2139	2.61976e-42	1.60745e-39	85.79	Down-regulated
TEP1	-1.76123	-20.1624	3.38311e-42	2.01653e-39	85.5364	Down-regulated
NUMB	-2.12703	-19.8284	1.7913e-41	1.03806e-38	83.8829	Down-regulated
SRPRA	1.37454	19.7092	3.25655e-41	1.83617e-38	83.2899	Up-regulated
FTX	1.88616	19.6532	4.3168e-41	2.36992e-38	83.0102	Up-regulated
PPP2R1A	1.45335	19.5513	7.21472e-41	3.85932e-38	82.5005	Up-regulated
GET3	1.24998	19.2541	3.24982e-40	1.69494e-37	81.0069	Up-regulated
ARRB2	1.4666	19.0434	9.50749e-40	4.83769e-37	79.9413	Up-regulated
PCIF1	1.3605	18.976	1.34218e-39	6.66678e-37	79.599	Up-regulated
CNOT3	1.78156	18.9342	1.66225e-39	8.0646e-37	79.3867	Up-regulated
GNAI2	1.65199	18.9224	1.76597e-39	8.37309e-37	79.3266	Up-regulated
CTNNBL1	-1.53252	-18.8906	2.07843e-39	9.6356e-37	79.1649	Down-regulated
PLD3	2.1394	18.8676	2.33857e-39	1.06059e-36	79.0478	Up-regulated
GIPR	-1.71135	-18.7962	3.37596e-39	1.4985e-36	78.6833	Down-regulated
FMN1	-1.64735	-18.783	3.61178e-39	1.56977e-36	78.6163	Down-regulated
ANAPC2	1.44226	18.6464	7.29903e-39	3.1076e-36	77.9177	Up-regulated
CYP2C19	-2.23406	-18.6294	7.96902e-39	3.32499e-36	77.8305	Down-regulated
CCDC134	-1.80832	-18.5112	1.46807e-38	6.00528e-36	77.2239	Down-regulated
TALAM1	1.87989	18.5007	1.54997e-38	6.21836e-36	77.17	Up-regulated
UBA1	1.51812	18.4853	1.67908e-38	6.60923e-36	77.0905	Up-regulated
ESAM-AS1	-2.05476	-18.4645	1.86967e-38	7.22316e-36	76.9837	Down-regulated
STYK1	-2.73511	-18.4162	2.40182e-38	9.11032e-36	76.735	Down-regulated
GMDS-DT	-2.2077	-18.3485	3.41383e-38	1.27177e-35	76.3858	Down-regulated
SUDS3	-1.60099	-18.327	3.81733e-38	1.39714e-35	76.2749	Down-regulated
RGS1	3.58656	18.3055	4.26865e-38	1.53539e-35	76.1639	Up-regulated
SF3B4	1.79122	18.1778	8.30414e-38	2.93629e-35	75.503	Up-regulated
RDH5	-1.44276	-18.1735	8.49453e-38	2.95355e-35	75.4805	Down-regulated
MROCKI	-1.75396	-18.1332	1.048e-37	3.58418e-35	75.2719	Down-regulated
TRIM28	1.77336	18.1012	1.23916e-37	4.16957e-35	75.1055	Up-regulated
TNF	2.28797	18.0651	1.49668e-37	4.95614e-35	74.9179	Up-regulated
MRPL38	1.50307	18.033	1.7699e-37	5.74552e-35	74.7514	Up-regulated
ZYX	2.27469	18.0309	1.79014e-37	5.74552e-35	74.7401	Up-regulated
ZNF37A	-1.72229	-17.9902	2.21469e-37	7.00044e-35	74.5287	Down-regulated
TRPM7	-1.43697	-17.9806	2.32967e-37	7.23777e-35	74.4784	Down-regulated
ADH7	-3.21196	-17.9782	2.35916e-37	7.23777e-35	74.4659	Down-regulated
DICER1	1.65261	17.9444	2.81694e-37	8.51696e-35	74.2898	Up-regulated
WASHC4	1.57663	17.8568	4.46289e-37	1.33007e-34	73.8327	Up-regulated
MON1B	-1.35461	-17.8212	5.37975e-37	1.58074e-34	73.6471	Down-regulated
HMGN2P46	-3.41064	-17.7918	6.28087e-37	1.81988e-34	73.4932	Down-regulated
BICDL1	-2.61218	-17.7421	8.16007e-37	2.33199e-34	73.2332	Down-regulated
YWHAE	1.55613	17.7157	9.37926e-37	2.64419e-34	73.0949	Up-regulated
EPHX1	2.81337	17.6844	1.10677e-36	3.07859e-34	72.9304	Up-regulated
FIZ1	1.18999	17.6382	1.41261e-36	3.8776e-34	72.688	Up-regulated
SYT16	-2.43312	-17.617	1.57988e-36	4.28046e-34	72.5768	Down-regulated
FKBP8	1.67302	17.5931	1.79259e-36	4.74564e-34	72.4513	Up-regulated
STING1	2.12797	17.5926	1.79707e-36	4.74564e-34	72.4489	Up-regulated
STX5	1.124	17.5669	2.05916e-36	5.36977e-34	72.3136	Up-regulated
CD4	1.95098	17.5553	2.19021e-36	5.641e-34	72.2523	Up-regulated
CDC42	1.65337	17.5279	2.53105e-36	6.43935e-34	72.1086	Up-regulated
DCAF15	1.28742	17.4387	4.06402e-36	1.02149e-33	71.6381	Up-regulated
SPINK7	-2.26535	-17.352	6.44152e-36	1.5998e-33	71.1805	Down-regulated
ERMAP	-1.23823	-17.3431	6.7525e-36	1.6573e-33	71.1336	Down-regulated
CCN1	4.34468	17.2584	1.06056e-35	2.57271e-33	70.685	Up-regulated
CIZ1	1.22115	17.2278	1.24817e-35	2.99304e-33	70.5232	Up-regulated
GDAP2	1.71284	17.2063	1.40007e-35	3.31912e-33	70.409	Up-regulated
CWH43	-3.64541	-17.1257	2.15305e-35	5.04686e-33	69.9814	Down-regulated
SPATA6	-2.52889	-17.0509	3.21342e-35	7.44871e-33	69.5834	Down-regulated
ND2	0.822155	17.0242	3.70808e-35	8.50088e-33	69.4411	Not-significant
KDM4C	-1.27592	-17.0078	4.04852e-35	9.18045e-33	69.3539	Down-regulated
IL10RB	-1.67498	-16.9997	4.22724e-35	9.48265e-33	69.3109	Down-regulated
UXS1	-1.25803	-16.9946	4.34446e-35	9.64192e-33	69.2837	Down-regulated
CCDC142	-1.29676	-16.9574	5.30371e-35	1.1647e-32	69.0855	Down-regulated
SPATA24	0.979113	16.9492	5.54397e-35	1.20477e-32	69.0414	Up-regulated
AGO3	1.50395	16.8526	9.31685e-35	2.0038e-32	68.5255	Up-regulated
BCAR3	-2.09803	-16.754	1.58402e-34	3.37202e-32	67.9981	Down-regulated
BRSK1	1.44311	16.7186	1.91722e-34	4.0401e-32	67.8083	Up-regulated
NKX6-3	-2.011	-16.6876	2.26704e-34	4.7295e-32	67.6417	Down-regulated
BTBD2	1.41247	16.6281	3.12677e-34	6.45849e-32	67.3222	Up-regulated
ZDHHC21	-1.4165	-16.5772	4.11718e-34	8.42084e-32	67.0487	Down-regulated
LINC02905	-1.92538	-16.5737	4.19607e-34	8.49887e-32	67.0298	Down-regulated
LOC105369890	-1.59006	-16.5502	4.76419e-34	9.55679e-32	66.9036	Down-regulated
TMEM214	1.30832	16.5321	5.25569e-34	1.04423e-31	66.806	Up-regulated
NSD3	1.27189	16.5227	5.53079e-34	1.08852e-31	66.7553	Up-regulated
EMP3	2.77716	16.5169	5.70526e-34	1.11237e-31	66.7244	Up-regulated
PABPN1	-1.12251	-16.4333	8.97782e-34	1.72344e-31	66.2738	Down-regulated
RTL10	-1.05283	-16.4328	9.00464e-34	1.72344e-31	66.2708	Down-regulated
SHH	-2.53541	-16.4256	9.36521e-34	1.77615e-31	66.2318	Down-regulated
INO80B	0.911454	16.4219	9.55106e-34	1.79508e-31	66.2122	Up-regulated
MGAT3	-1.6722	-16.4004	1.07347e-33	1.99953e-31	66.0961	Down-regulated
SBNO2	1.61547	16.3897	1.13797e-33	2.10092e-31	66.0381	Up-regulated
COL6A2	4.11513	16.3531	1.38868e-33	2.54128e-31	65.8402	Up-regulated
NEUROD1	-2.70199	-16.3506	1.4075e-33	2.55333e-31	65.8268	Down-regulated
ABHD6	-1.46988	-16.3468	1.43673e-33	2.58388e-31	65.8064	Down-regulated
KLHDC3	1.62155	16.3211	1.65212e-33	2.94586e-31	65.6675	Up-regulated
BBX	1.93271	16.2772	2.09804e-33	3.70927e-31	65.43	Up-regulated
ATF6B	-0.98778	-16.2449	2.5022e-33	4.38662e-31	65.2549	Down-regulated
INSR	-1.62774	-16.2217	2.83891e-33	4.93544e-31	65.1294	Down-regulated
ZNF662	-2.74053	-16.2016	3.16889e-33	5.46358e-31	65.02	Down-regulated
CENPT	1.50607	16.1853	3.46309e-33	5.92188e-31	64.9318	Up-regulated
BSG	1.76991	16.172	3.72477e-33	6.31758e-31	64.8594	Up-regulated
C5AR1	2.75066	16.1518	4.15692e-33	6.99368e-31	64.7502	Up-regulated
CD74	2.24149	16.1492	4.21753e-33	7.03889e-31	64.7359	Up-regulated
PLEKHJ1	-1.32121	-16.1322	4.62784e-33	7.66238e-31	64.6436	Down-regulated
ATP9B	-1.81592	-16.0812	6.11447e-33	1.00441e-30	64.3666	Down-regulated
ALAD	-1.25358	-16.0552	7.05051e-33	1.14912e-30	64.225	Down-regulated
ASB8	-1.08465	-16.0113	8.96647e-33	1.45007e-30	63.986	Down-regulated
JPX	-2.10374	-16.0091	9.07493e-33	1.45632e-30	63.9741	Down-regulated
LY6E	3.0932	16.0049	9.2873e-33	1.47902e-30	63.9511	Up-regulated
EVI5	-1.60485	-15.9824	1.05042e-32	1.66015e-30	63.8287	Down-regulated
LETM1	-1.37391	-15.9636	1.16401e-32	1.82584e-30	63.7266	Down-regulated
SLC22A5	-1.74927	-15.9283	1.41289e-32	2.19967e-30	63.534	Down-regulated
AP2A1	1.07781	15.9211	1.47016e-32	2.27189e-30	63.4945	Up-regulated
PTPDC1	-1.40036	-15.9116	1.54843e-32	2.37525e-30	63.4429	Down-regulated
STON2	-2.04905	-15.7731	3.31372e-32	5.04604e-30	62.6865	Down-regulated
TNNI3K	-1.32265	-15.7571	3.62032e-32	5.47298e-30	62.5985	Down-regulated
STRN4	1.43178	15.7541	3.67981e-32	5.52289e-30	62.5823	Up-regulated
SLC4A2	1.75776	15.7281	4.24721e-32	6.32896e-30	62.4397	Up-regulated
CBR1	-2.2326	-15.7193	4.45596e-32	6.59293e-30	62.392	Down-regulated
AKT1S1	1.31188	15.7179	4.49077e-32	6.59763e-30	62.3843	Up-regulated
SLC7A8	-2.15307	-15.6732	5.74606e-32	8.38282e-30	62.1392	Down-regulated
RAB3IL1	1.03088	15.6528	6.43137e-32	9.31744e-30	62.0272	Up-regulated
PITHD1	-0.930124	-15.6011	8.55523e-32	1.23089e-29	61.7434	Down-regulated
ZZEF1	-1.30138	-15.5776	9.73857e-32	1.39155e-29	61.6146	Down-regulated
KHNYN	-1.25863	-15.5729	9.99662e-32	1.4187e-29	61.5886	Down-regulated
SGSM1	-2.14392	-15.5276	1.28401e-31	1.80994e-29	61.3397	Down-regulated
IRF3	1.21336	15.5208	1.3332e-31	1.86666e-29	61.3024	Up-regulated
VAC14	1.25092	15.5032	1.46924e-31	2.04341e-29	61.2057	Up-regulated
PPP1R9B	1.5478	15.4635	1.8303e-31	2.52872e-29	60.9873	Up-regulated
CENPB	1.49613	15.442	2.06162e-31	2.82958e-29	60.8689	Up-regulated
CLTRN	-3.36407	-15.4363	2.12824e-31	2.90192e-29	60.8373	Down-regulated
ABCF2	1.23384	15.3757	2.97752e-31	4.03357e-29	60.5034	Up-regulated
CYB561D1	-0.905671	-15.358	3.28416e-31	4.42026e-29	60.406	Down-regulated
GTF2I	1.51561	15.3205	4.04277e-31	5.40643e-29	60.1993	Up-regulated
ABCC6P1	-2.19204	-15.2843	4.94448e-31	6.57018e-29	59.9991	Down-regulated
HGS	1.10589	15.2749	5.21045e-31	6.87977e-29	59.947	Up-regulated
PRAF2	1.93528	15.2616	5.60837e-31	7.35861e-29	59.8738	Up-regulated
KLHDC7A	-2.72329	-15.2571	5.75039e-31	7.4978e-29	59.849	Down-regulated
PNPLA2	1.09402	15.2282	6.7533e-31	8.72847e-29	59.6891	Up-regulated
RBM42	1.36802	15.2275	6.77793e-31	8.72847e-29	59.6855	Up-regulated
PSMF1	1.19986	15.1904	8.33086e-31	1.06625e-28	59.4804	Up-regulated
CCDC124	1.12456	15.1748	9.09031e-31	1.15635e-28	59.3936	Up-regulated
PPP1CB	1.62937	15.1696	9.35752e-31	1.18313e-28	59.3648	Up-regulated
RSRP1	-1.54907	-15.1648	9.61112e-31	1.20787e-28	59.3382	Down-regulated
TMEM266	-1.39058	-15.1481	1.05465e-30	1.31749e-28	59.2459	Down-regulated
SIDT2	-1.85097	-15.1441	1.07814e-30	1.33882e-28	59.224	Down-regulated
MLF2	1.29072	15.1424	1.08821e-30	1.34333e-28	59.2147	Up-regulated
PFN1	1.06896	15.1259	1.19345e-30	1.46458e-28	59.1229	Up-regulated
PLCH1	-1.92755	-15.122	1.21934e-30	1.48759e-28	59.1016	Down-regulated
DNAJC17	-0.952448	-15.1091	1.31031e-30	1.58928e-28	59.03	Down-regulated
NAPEPLD	-2.8959	-15.1045	1.34476e-30	1.62164e-28	59.0042	Down-regulated
YIF1B	1.40619	15.1029	1.35642e-30	1.62631e-28	58.9956	Up-regulated
GPNMB	2.83535	15.076	1.5756e-30	1.8783e-28	58.8467	Up-regulated
CFAP44	-1.68862	-15.0652	1.67342e-30	1.98357e-28	58.7868	Down-regulated
ARL16	-0.996426	-15.0629	1.69569e-30	1.99861e-28	58.7736	Down-regulated
AGO1	1.19387	15.0349	1.98242e-30	2.32344e-28	58.6183	Up-regulated
BGN	3.64604	15.0257	2.08674e-30	2.43204e-28	58.5673	Up-regulated
ZNF414	0.67057	15.0121	2.25066e-30	2.60852e-28	58.4921	Not-significant
RPS6KA6	-1.65192	-14.9872	2.58664e-30	2.98135e-28	58.3537	Down-regulated
IFITM2	1.67611	14.9842	2.62997e-30	3.01464e-28	58.3372	Up-regulated
UBXN11	1.13493	14.9717	2.82111e-30	3.21606e-28	58.2675	Up-regulated
PRPF39	-1.47049	-14.9531	3.13011e-30	3.54893e-28	58.1641	Down-regulated
SLC10A7	-1.52394	-14.9473	3.23166e-30	3.64427e-28	58.1323	Down-regulated
NNMT	3.28293	14.8946	4.34043e-30	4.86828e-28	57.839	Up-regulated
MAFG	-1.35165	-14.8852	4.57447e-30	5.10334e-28	57.7868	Down-regulated
ZNF264	1.63515	14.8563	5.37837e-30	5.95129e-28	57.6258	Up-regulated
MAGI3	-2.06756	-14.8558	5.39159e-30	5.95129e-28	57.6234	Down-regulated
ITPKA	-2.74452	-14.8536	5.458e-30	5.97247e-28	57.6112	Down-regulated
GIGYF1	1.02405	14.8533	5.46803e-30	5.97247e-28	57.6094	Up-regulated
FAM104A	-1.05519	-14.8421	5.82239e-30	6.32639e-28	57.5469	Down-regulated
TMEM176B	1.93593	14.8149	6.77936e-30	7.32803e-28	57.3956	Up-regulated
DNASE1	-0.700954	-14.8056	7.14197e-30	7.6802e-28	57.3438	Not-significant
SPTSSB	-1.88916	-14.8043	7.19606e-30	7.69868e-28	57.3363	Down-regulated
DYNLL1	-0.67414	-14.7921	7.70516e-30	8.20128e-28	57.2683	Not-significant
UBALD1	1.18813	14.7774	8.36624e-30	8.85972e-28	57.1864	Up-regulated
LAMA5-AS1	-0.689023	-14.7671	8.8618e-30	9.33711e-28	57.1292	Not-significant
PPP5C	0.96405	14.757	9.37756e-30	9.83089e-28	57.073	Up-regulated
SMIM6	-3.80919	-14.752	9.64517e-30	1.00609e-27	57.045	Down-regulated
SEC14L1P1	-1.46346	-14.725	1.12258e-29	1.16513e-27	56.8941	Down-regulated
BRD1	-1.07407	-14.7189	1.16149e-29	1.19955e-27	56.8602	Down-regulated
ZNF75D	-1.26678	-14.6824	1.42573e-29	1.4652e-27	56.6563	Down-regulated
LINC02777	-1.27226	-14.6674	1.55044e-29	1.58556e-27	56.573	Down-regulated
KBTBD3	-1.17679	-14.6597	1.61897e-29	1.64756e-27	56.5299	Down-regulated
DRAP1	1.30241	14.6389	1.82012e-29	1.84327e-27	56.4135	Up-regulated
IFITM3	1.49949	14.6264	1.95262e-29	1.9679e-27	56.3436	Up-regulated
VSIG10	-2.11903	-14.6242	1.97635e-29	1.98224e-27	56.3316	Down-regulated
GDPD1	-2.96395	-14.6144	2.088e-29	2.0842e-27	56.2769	Down-regulated
SCAF1	1.1864	14.6122	2.11465e-29	2.10075e-27	56.2643	Up-regulated
PNPLA6	1.34034	14.5887	2.41313e-29	2.38591e-27	56.133	Up-regulated
PARVB	1.65081	14.5738	2.62347e-29	2.58164e-27	56.0499	Up-regulated
TPP1	1.19521	14.5611	2.81894e-29	2.76097e-27	55.9785	Up-regulated
CCNDBP1	-1.38715	-14.5519	2.96762e-29	2.89301e-27	55.9273	Down-regulated
NIPA1	-1.42973	-14.5506	2.98992e-29	2.90119e-27	55.9199	Down-regulated
GHDC	1.34843	14.5433	3.11607e-29	3.0096e-27	55.8788	Up-regulated
CHMP2A	-1.02907	-14.5104	3.74997e-29	3.60516e-27	55.6946	Down-regulated
GPD1L	-1.93141	-14.5025	3.92035e-29	3.75167e-27	55.6505	Down-regulated
GRINA	1.81308	14.4789	4.47795e-29	4.2657e-27	55.5182	Up-regulated
SWSAP1	-1.18599	-14.4607	4.95966e-29	4.70311e-27	55.4166	Down-regulated
LRRC57	-1.34877	-14.4459	5.39213e-29	5.09007e-27	55.3335	Down-regulated
PRDM10	-1.15275	-14.4246	6.07832e-29	5.71198e-27	55.2143	Down-regulated
GEM	2.99884	14.4226	6.1479e-29	5.75145e-27	55.203	Up-regulated
NCOR1	-1.08354	-14.4202	6.23169e-29	5.80382e-27	55.1896	Down-regulated
STX17	0.988157	14.4144	6.44053e-29	5.97166e-27	55.1568	Up-regulated
GOLGA2P10	-1.72014	-14.4089	6.64332e-29	6.13243e-27	55.1259	Down-regulated
TMEM128	-1.18008	-14.3837	7.65861e-29	7.0385e-27	54.9845	Down-regulated
SRGAP2	1.73924	14.3799	7.82412e-29	7.15907e-27	54.9633	Up-regulated
SHISA6	-2.31317	-14.3672	8.40181e-29	7.65409e-27	54.8924	Down-regulated
LANCL3	-0.858856	-14.3599	8.75897e-29	7.94476e-27	54.851	Not-significant
LOC101928881	-1.60387	-14.3552	8.99185e-29	8.1207e-27	54.8249	Down-regulated
ASAP2	-1.67953	-14.3242	1.07152e-28	9.63539e-27	54.6505	Down-regulated
MSS51	-0.967677	-14.3218	1.08565e-28	9.72053e-27	54.6375	Down-regulated
APOLD1	2.7026	14.3204	1.09436e-28	9.75667e-27	54.6296	Up-regulated
SMPD3	-2.53185	-14.3141	1.13393e-28	1.00664e-26	54.5942	Down-regulated
MIR200CHG	-1.40964	-14.288	1.31449e-28	1.16199e-26	54.4473	Down-regulated
DIO2	3.66424	14.2687	1.4654e-28	1.28992e-26	54.3392	Up-regulated
PTGR2	-1.41092	-14.2607	1.53362e-28	1.3443e-26	54.294	Down-regulated
DENND11	-1.74352	-14.241	1.71429e-28	1.49638e-26	54.1832	Down-regulated
SNHG10	-1.34855	-14.2258	1.86838e-28	1.61805e-26	54.0976	Down-regulated
C1QA	2.19057	14.2257	1.86919e-28	1.61805e-26	54.0972	Up-regulated
FAXDC2	0.670898	14.2132	2.00663e-28	1.72985e-26	54.0266	Not-significant
CCN2	2.94971	14.2025	2.13117e-28	1.82965e-26	53.9667	Up-regulated
ABHD18	-1.05827	-14.2006	2.15436e-28	1.84197e-26	53.956	Down-regulated
ALDH3A2	-1.94217	-14.1972	2.19591e-28	1.86361e-26	53.937	Down-regulated
DAD1	-0.933025	-14.1971	2.19753e-28	1.86361e-26	53.9363	Down-regulated
ALDOC	-1.8756	-14.1858	2.34213e-28	1.9782e-26	53.8729	Down-regulated
HNRNPD-DT	-1.01175	-14.1733	2.51368e-28	2.11453e-26	53.8026	Down-regulated
ZFAND2B	-0.980234	-14.1691	2.57524e-28	2.15762e-26	53.7785	Down-regulated
LDHD	-1.84974	-14.1659	2.62133e-28	2.18744e-26	53.7609	Down-regulated
PRR14L	-0.840236	-14.1577	2.74665e-28	2.28289e-26	53.7144	Not-significant
USF2	0.913011	14.1533	2.81533e-28	2.33069e-26	53.6899	Up-regulated
MAZ	1.13822	14.1508	2.85615e-28	2.35514e-26	53.6756	Up-regulated
SPATA5	-2.71896	-14.1412	3.01471e-28	2.4761e-26	53.6218	Down-regulated
SMARCB1	1.03483	14.1318	3.18006e-28	2.60167e-26	53.5687	Up-regulated
MSL2	-1.2087	-14.117	3.4579e-28	2.81792e-26	53.4854	Down-regulated
ASCC2	-1.23036	-14.099	3.82957e-28	3.10866e-26	53.3839	Down-regulated
MTMR3	-0.886096	-14.0969	3.8758e-28	3.13399e-26	53.372	Not-significant
IGFBP4	3.39095	14.0752	4.38311e-28	3.53051e-26	53.2496	Up-regulated
STX18	-0.963965	-14.0598	4.78157e-28	3.83666e-26	53.1631	Down-regulated
NMT2	-1.46248	-14.0566	4.87106e-28	3.89349e-26	53.1447	Down-regulated
PDLIM7	3.73711	14.0225	5.90822e-28	4.70448e-26	52.9527	Up-regulated
MAF1	1.0764	14.0049	6.53127e-28	5.18081e-26	52.853	Up-regulated
NDOR1	-1.11619	-14.0038	6.56869e-28	5.19076e-26	52.8473	Down-regulated
VSTM2A-OT1	-0.702444	-14.0014	6.66052e-28	5.24346e-26	52.8335	Not-significant
AMPD1	-2.86978	-13.9972	6.8226e-28	5.35087e-26	52.8096	Down-regulated
SPRYD7	-1.2922	-13.9937	6.95861e-28	5.43709e-26	52.79	Down-regulated
PRKCSH	1.07185	13.9778	7.61731e-28	5.92956e-26	52.7	Up-regulated
SLC25A20	-1.58874	-13.977	7.65054e-28	5.93329e-26	52.6957	Down-regulated
ACO1	-1.21247	-13.9752	7.72676e-28	5.97021e-26	52.6858	Down-regulated
TTC39B	-1.74038	-13.9706	7.93373e-28	6.10751e-26	52.6596	Down-regulated
ACOX1	-1.78879	-13.955	8.66753e-28	6.64787e-26	52.5716	Down-regulated
MMP19	2.20112	13.9419	9.33544e-28	7.13392e-26	52.4978	Up-regulated
DMWD	1.017	13.9344	9.74515e-28	7.41983e-26	52.455	Up-regulated
SNX24	-1.24036	-13.9101	1.11834e-27	8.46372e-26	52.3181	Down-regulated
LOC102724156	-1.72113	-13.9099	1.11973e-27	8.46372e-26	52.3169	Down-regulated
BPTF	-1.2624	-13.8714	1.39373e-27	1.04967e-25	52.0992	Down-regulated
PWP1	0.889829	13.8488	1.58466e-27	1.18918e-25	51.9715	Not-significant
ABCA5	-1.96501	-13.8371	1.69443e-27	1.267e-25	51.9049	Down-regulated
PGBD4	-0.782278	-13.8251	1.8137e-27	1.35133e-25	51.8373	Not-significant
RBM26	-1.48365	-13.8185	1.8828e-27	1.39783e-25	51.8001	Down-regulated
TMEM38A	-1.97917	-13.8132	1.94039e-27	1.43547e-25	51.7701	Down-regulated
PEX11A	-1.73889	-13.8029	2.05761e-27	1.51681e-25	51.7118	Down-regulated
CSF3R	1.60279	13.7792	2.3554e-27	1.73022e-25	51.5774	Up-regulated
SLC12A6	-0.919822	-13.7457	2.84919e-27	2.0856e-25	51.3881	Down-regulated
SLC39A11	-2.46003	-13.7449	2.8626e-27	2.08809e-25	51.3835	Down-regulated
DHRS7	-1.61918	-13.7433	2.88878e-27	2.09985e-25	51.3744	Down-regulated
DOP1B	-2.47588	-13.7359	3.01271e-27	2.18233e-25	51.3326	Down-regulated
IGFBP7	2.3474	13.7353	3.02429e-27	2.18314e-25	51.3288	Up-regulated
ATP11B	-1.5847	-13.7314	3.09154e-27	2.22399e-25	51.3069	Down-regulated
HPS4	-0.813767	-13.7305	3.1079e-27	2.22808e-25	51.3017	Not-significant
ZNF708	-1.08899	-13.7173	3.35104e-27	2.39416e-25	51.2268	Down-regulated
GPT	-1.016	-13.7044	3.6055e-27	2.56717e-25	51.154	Down-regulated
AQP1	3.58932	13.7008	3.68034e-27	2.61154e-25	51.1336	Up-regulated
TAPT1	-1.30346	-13.6977	3.74652e-27	2.64949e-25	51.1158	Down-regulated
CD37	3.18537	13.6789	4.16998e-27	2.93899e-25	51.0094	Up-regulated
NR1D2	2.07671	13.677	4.21635e-27	2.96167e-25	50.9984	Up-regulated
SEC22B	1.2842	13.6518	4.86623e-27	3.40669e-25	50.8558	Up-regulated
BRPF3	-1.06942	-13.6488	4.94933e-27	3.45327e-25	50.839	Down-regulated
SEPSECS	-1.6019	-13.643	5.11718e-27	3.55849e-25	50.8058	Down-regulated
ZNF385A	0.922918	13.6422	5.14129e-27	3.56337e-25	50.8011	Up-regulated
C9orf85	-1.12085	-13.6339	5.38922e-27	3.72285e-25	50.7543	Down-regulated
NIPAL3	-1.15053	-13.6327	5.42723e-27	3.73673e-25	50.7473	Down-regulated
ADIPOR2	-1.30739	-13.6228	5.74266e-27	3.9409e-25	50.6911	Down-regulated
STT3A	-1.48663	-13.6176	5.91454e-27	4.04554e-25	50.6618	Down-regulated
DR1	-1.28892	-13.5937	6.77684e-27	4.62021e-25	50.5264	Down-regulated
LOC100996506	0.733283	13.5804	7.31363e-27	4.95949e-25	50.4506	Not-significant
THY1	2.89722	13.5802	7.32204e-27	4.95949e-25	50.4495	Up-regulated
DUSP1	2.26714	13.5737	7.59749e-27	5.12941e-25	50.4128	Up-regulated
IL32	2.42271	13.5713	7.70218e-27	5.18332e-25	50.3992	Up-regulated
BTBD7	-0.931286	-13.5555	8.43164e-27	5.65563e-25	50.3092	Down-regulated
NADK	-1.17976	-13.5549	8.45824e-27	5.65563e-25	50.306	Down-regulated
INHBA	4.6813	13.5434	9.03561e-27	6.02239e-25	50.2404	Up-regulated
HEATR5B	-1.10209	-13.5403	9.19703e-27	6.11046e-25	50.2228	Down-regulated
C17orf58	-1.54523	-13.5308	9.70512e-27	6.42757e-25	50.1693	Down-regulated
IGSF8	1.2773	13.5271	9.91229e-27	6.54399e-25	50.1483	Up-regulated
YPEL2	-1.47037	-13.5226	1.01698e-26	6.69285e-25	50.1228	Down-regulated
HES1	-2.14218	-13.5197	1.03426e-26	6.78511e-25	50.106	Down-regulated
ENTPD5	-3.16761	-13.5158	1.05739e-26	6.91515e-25	50.084	Down-regulated
WNK1	1.21591	13.5028	1.13892e-26	7.42505e-25	50.0102	Up-regulated
RHOB	2.66847	13.5002	1.15638e-26	7.51542e-25	49.995	Up-regulated
PSAPL1	-3.11882	-13.4969	1.17841e-26	7.63481e-25	49.9763	Down-regulated
CASZ1	-2.57394	-13.4934	1.20174e-26	7.75667e-25	49.9568	Down-regulated
GPSM3	1.3945	13.493	1.20466e-26	7.75667e-25	49.9544	Up-regulated
TRPV1	-1.19843	-13.4847	1.26284e-26	8.09491e-25	49.9075	Down-regulated
UMAD1	-1.7277	-13.4845	1.26495e-26	8.09491e-25	49.9058	Down-regulated
TMCO3	-1.6016	-13.4768	1.3215e-26	8.43094e-25	49.8623	Down-regulated
RAVER1	1.28607	13.4727	1.35281e-26	8.60437e-25	49.839	Up-regulated
SFRP2	5.87694	13.4699	1.37448e-26	8.71563e-25	49.8232	Up-regulated
CCDC125	-1.86379	-13.4687	1.38433e-26	8.75146e-25	49.8161	Down-regulated
ALG12	0.990654	13.4619	1.43898e-26	9.0695e-25	49.7776	Up-regulated
ZNF564	-0.90155	-13.4574	1.47667e-26	9.27901e-25	49.7519	Down-regulated
SIGLEC5	1.04608	13.4422	1.61064e-26	1.00904e-24	49.6655	Up-regulated
BAZ2A	1.15675	13.4242	1.78503e-26	1.11495e-24	49.5633	Up-regulated
UBE4A	-1.02192	-13.3852	2.23109e-26	1.3894e-24	49.3415	Down-regulated
CS	0.9676	13.3817	2.27658e-26	1.41351e-24	49.3214	Up-regulated
SOX21-AS1	-2.5916	-13.3751	2.36431e-26	1.46363e-24	49.2838	Down-regulated
COL8A1	4.76625	13.3715	2.41285e-26	1.48926e-24	49.2636	Up-regulated
NR1H2	1.00374	13.3577	2.61142e-26	1.60707e-24	49.185	Up-regulated
SPIRE2	-1.90642	-13.3569	2.62382e-26	1.60994e-24	49.1803	Down-regulated
GLUD1	-1.29692	-13.3527	2.68671e-26	1.6437e-24	49.1567	Down-regulated
SGSM3	-1.553	-13.3417	2.86177e-26	1.74568e-24	49.0939	Down-regulated
PEX19	0.912944	13.3375	2.93097e-26	1.78268e-24	49.0702	Up-regulated
GK5	-1.58025	-13.3274	3.10577e-26	1.88351e-24	49.0126	Down-regulated
ZNF630	-1.36708	-13.3243	3.16104e-26	1.91147e-24	48.995	Down-regulated
TMEM161B-DT	-0.921802	-13.3181	3.27645e-26	1.97119e-24	48.9594	Down-regulated
SEC14L5	-1.20241	-13.318	3.27871e-26	1.97119e-24	48.9587	Down-regulated
ATN1	0.665735	13.3029	3.573e-26	2.13851e-24	48.8732	Not-significant
FAM120AOS	-0.863952	-13.3027	3.57751e-26	2.13851e-24	48.872	Not-significant
LOC145474	-1.8906	-13.2982	3.67218e-26	2.18883e-24	48.846	Down-regulated
RBM33	-0.857128	-13.2953	3.73209e-26	2.2182e-24	48.8299	Not-significant
PHYH	-1.79175	-13.2944	3.75294e-26	2.22426e-24	48.8244	Down-regulated
ABCC5	-1.82901	-13.2876	3.9005e-26	2.30516e-24	48.786	Down-regulated
COX16	-1.16587	-13.2811	4.04948e-26	2.38645e-24	48.7487	Down-regulated
TRAPPC4	-0.891749	-13.2785	4.10987e-26	2.41522e-24	48.734	Not-significant
SIKE1	-1.29051	-13.2704	4.30519e-26	2.52289e-24	48.6878	Down-regulated
BPHL	-1.13654	-13.2665	4.40263e-26	2.57276e-24	48.6656	Down-regulated
UNC5B-AS1	-1.49091	-13.2484	4.88406e-26	2.84612e-24	48.5624	Down-regulated
LOC389199	0.628473	13.2234	5.6367e-26	3.27557e-24	48.4199	Not-significant
STS	-2.44995	-13.2205	5.73015e-26	3.32062e-24	48.4035	Down-regulated
ZBTB3	-0.824516	-13.1989	6.48437e-26	3.74728e-24	48.2806	Not-significant
F7	1.52146	13.184	7.06249e-26	4.0701e-24	48.1956	Up-regulated
ZNF410	-0.594493	-13.1787	7.28417e-26	4.17692e-24	48.1649	Not-significant
PIGQ	0.708804	13.1786	7.28789e-26	4.17692e-24	48.1644	Not-significant
AAMDC	-1.38207	-13.169	7.69986e-26	4.40094e-24	48.1097	Down-regulated
RASAL2	1.4022	13.1645	7.90045e-26	4.50326e-24	48.0841	Up-regulated
PTPN9	0.796683	13.1559	8.3005e-26	4.71839e-24	48.035	Not-significant
RETSAT	-1.62374	-13.1528	8.44746e-26	4.78889e-24	48.0176	Down-regulated
MIDEAS	-1.04946	-13.1307	9.59103e-26	5.42244e-24	47.8913	Down-regulated
DHFR2	-0.958486	-13.127	9.79606e-26	5.52339e-24	47.8703	Down-regulated
PRDX5	-1.24798	-13.1238	9.97981e-26	5.61183e-24	47.8518	Down-regulated
DGKD	-1.7141	-13.1041	1.11731e-25	6.26594e-24	47.7395	Down-regulated
ZNF211	-1.32644	-13.0945	1.18027e-25	6.60127e-24	47.685	Down-regulated
GLCE	-1.66004	-13.0731	1.33479e-25	7.44554e-24	47.5626	Down-regulated
SELL	2.923	13.0726	1.33852e-25	7.44644e-24	47.5599	Up-regulated
B4GALNT3	-2.27986	-13.0666	1.38554e-25	7.68752e-24	47.5255	Down-regulated
GAN	-1.19632	-13.0641	1.4058e-25	7.77923e-24	47.5111	Down-regulated
ZBTB7A	-0.906438	-13.0569	1.46507e-25	8.08577e-24	47.47	Down-regulated
LINC01644	-1.05672	-13.0517	1.50907e-25	8.30664e-24	47.4406	Down-regulated
HHLA3	0.956613	13.0454	1.56488e-25	8.5823e-24	47.4045	Up-regulated
COX17	-1.13083	-13.0451	1.56737e-25	8.5823e-24	47.4029	Down-regulated
ACAD8	-1.03212	-13.0176	1.8359e-25	1.00263e-23	47.2457	Down-regulated
C6orf62	-1.08542	-13.0152	1.86156e-25	1.01399e-23	47.2319	Down-regulated
PPARGC1B	-1.47204	-13.0133	1.88152e-25	1.02198e-23	47.2213	Down-regulated
FBXL17	-1.23388	-13.0129	1.88602e-25	1.02198e-23	47.2189	Down-regulated
ARHGAP32	-2.73339	-13.0094	1.92418e-25	1.03778e-23	47.199	Down-regulated
PHACTR4	-0.791029	-13.0093	1.92513e-25	1.03778e-23	47.1985	Not-significant
BAHD1	-0.903793	-13.0062	1.95984e-25	1.05377e-23	47.1807	Down-regulated
CALCOCO1	1.24703	12.9751	2.34367e-25	1.25691e-23	47.0029	Up-regulated
IFI27L1	-0.850062	-12.9703	2.40956e-25	1.28893e-23	46.9753	Not-significant
LINC00174	0.747352	12.9419	2.8373e-25	1.51386e-23	46.8128	Not-significant
TMEM134	-1.07265	-12.9321	3.00164e-25	1.59746e-23	46.7568	Down-regulated
AP4E1	-1.08925	-12.9285	3.06359e-25	1.62628e-23	46.7365	Down-regulated
LUC7L3	-1.466	-12.9271	3.08924e-25	1.63573e-23	46.7282	Down-regulated
PITPNA-AS1	-1.224	-12.9115	3.3793e-25	1.78478e-23	46.639	Down-regulated
BTBD8	-1.32224	-12.9029	3.54969e-25	1.87004e-23	46.5901	Down-regulated
PLTP	2.65611	12.895	3.71408e-25	1.95171e-23	46.5451	Up-regulated
IL2RG	2.58392	12.8896	3.8329e-25	2.00909e-23	46.5137	Up-regulated
SCAF4	-0.977289	-12.8824	3.99388e-25	2.08823e-23	46.4728	Down-regulated
BAD	-0.853397	-12.8795	4.06139e-25	2.11822e-23	46.4562	Not-significant
BICD1	0.86329	12.8694	4.30522e-25	2.23979e-23	46.3982	Not-significant
IL2RA	1.48396	12.8631	4.4638e-25	2.31651e-23	46.3622	Up-regulated
PPP2R5A	-0.933993	-12.8494	4.82898e-25	2.49981e-23	46.284	Down-regulated
NONO	0.600455	12.8404	5.08687e-25	2.62679e-23	46.2323	Not-significant
STBD1	-0.870016	-12.8349	5.24806e-25	2.70333e-23	46.2013	Not-significant
PRRX1	3.31347	12.8341	5.27266e-25	2.70932e-23	46.1966	Up-regulated
TRIO	1.27148	12.8333	5.29765e-25	2.71547e-23	46.1919	Up-regulated
CHGB	-4.65754	-12.7923	6.70896e-25	3.42275e-23	45.9571	Down-regulated
PYGO2	0.788651	12.7922	6.7103e-25	3.42275e-23	45.9569	Not-significant
MMEL1	-1.82969	-12.7915	6.73795e-25	3.42847e-23	45.9528	Down-regulated
OTUD1	-1.62462	-12.7891	6.83262e-25	3.46818e-23	45.9389	Down-regulated
PTPA	0.848212	12.7809	7.16213e-25	3.62661e-23	45.8921	Not-significant
LINC01347	0.958862	12.7728	7.50446e-25	3.79075e-23	45.8457	Up-regulated
CORO1C	1.4164	12.7693	7.65734e-25	3.85864e-23	45.8256	Up-regulated
DISP1	-1.5348	-12.7473	8.69021e-25	4.36856e-23	45.6998	Down-regulated
TMEM30A	1.51541	12.7311	9.54395e-25	4.7847e-23	45.6067	Up-regulated
EML3	0.973021	12.7307	9.56389e-25	4.7847e-23	45.6046	Up-regulated
RBM6	2.12667	12.7248	9.89341e-25	4.93771e-23	45.5709	Up-regulated
PDE4B	2.09947	12.7236	9.96271e-25	4.96043e-23	45.564	Up-regulated
GDPD3	-2.55665	-12.7119	1.06571e-24	5.29355e-23	45.497	Down-regulated
TMEM131	-1.01941	-12.7069	1.09674e-24	5.4347e-23	45.4684	Down-regulated
E2F7	0.625883	12.6922	1.19426e-24	5.90394e-23	45.3837	Not-significant
GPBP1L1	-0.839967	-12.6912	1.20072e-24	5.91142e-23	45.3784	Not-significant
TRIR	0.739473	12.6911	1.20144e-24	5.91142e-23	45.3778	Not-significant
ATP13A4	-2.98427	-12.6902	1.208e-24	5.92971e-23	45.3724	Down-regulated
PLVAP	2.06255	12.6888	1.21741e-24	5.96189e-23	45.3646	Up-regulated
MTERF2	-1.44216	-12.6878	1.22454e-24	5.98273e-23	45.3588	Down-regulated
MAGOH2P	-0.848386	-12.6867	1.23238e-24	6.00698e-23	45.3525	Not-significant
RNGTT	1.13716	12.686	1.23767e-24	6.01873e-23	45.3482	Up-regulated
COPG1	-1.66989	-12.6724	1.33816e-24	6.49226e-23	45.2706	Down-regulated
LOC100506730	-1.20276	-12.6634	1.4099e-24	6.82443e-23	45.2187	Down-regulated
NIPAL1	-1.91339	-12.6628	1.41466e-24	6.83164e-23	45.2153	Down-regulated
USP54	-1.7386	-12.6613	1.42638e-24	6.8723e-23	45.2071	Down-regulated
IL7R	2.45756	12.6608	1.43044e-24	6.876e-23	45.2043	Up-regulated
OS9	0.701435	12.6446	1.57114e-24	7.53499e-23	45.111	Not-significant
SAPCD1-AS1	-1.67179	-12.6426	1.58911e-24	7.60367e-23	45.0997	Down-regulated
COL6A3	2.59742	12.6334	1.6754e-24	7.98436e-23	45.0471	Up-regulated
TSPAN5	-2.03201	-12.6333	1.67632e-24	7.98436e-23	45.0466	Down-regulated
MFSD9	-1.6698	-12.6323	1.68605e-24	8.01237e-23	45.0408	Down-regulated
SCNN1B	-2.20517	-12.6249	1.7601e-24	8.34526e-23	44.9981	Down-regulated
CSF1R	1.72835	12.6206	1.80374e-24	8.53281e-23	44.9738	Up-regulated
SMDT1	-0.809051	-12.6188	1.82229e-24	8.60103e-23	44.9636	Not-significant
MYL9	4.46967	12.6117	1.89896e-24	8.94267e-23	44.9226	Up-regulated
C10orf95-AS1	-1.26446	-12.6069	1.95214e-24	9.17244e-23	44.8951	Down-regulated
LGALSL	-1.43929	-12.6003	2.02831e-24	9.50892e-23	44.8571	Down-regulated
AREL1	-1.04672	-12.5921	2.12636e-24	9.9462e-23	44.8102	Down-regulated
ACKR4	-3.19326	-12.5831	2.23929e-24	1.0451e-22	44.7587	Down-regulated
PCBD2	-1.31891	-12.5824	2.24871e-24	1.04716e-22	44.7545	Down-regulated
CNST	-1.04429	-12.5638	2.50266e-24	1.16282e-22	44.6482	Down-regulated
RALGPS1	-1.87867	-12.5534	2.65858e-24	1.23252e-22	44.5881	Down-regulated
ARHGAP19-SLIT1	0.57599	12.5523	2.67547e-24	1.2376e-22	44.5818	Not-significant
FBP2	-2.68277	-12.5436	2.81221e-24	1.29797e-22	44.5322	Down-regulated
GDI1	0.903989	12.5393	2.88388e-24	1.32811e-22	44.5072	Up-regulated
HACD2	-1.41619	-12.538	2.9043e-24	1.33457e-22	44.5002	Down-regulated
TERF2	1.032	12.537	2.92155e-24	1.33934e-22	44.4943	Up-regulated
APAF1	-1.35695	-12.5367	2.92753e-24	1.33934e-22	44.4923	Down-regulated
LINC00630	-0.722786	-12.534	2.9722e-24	1.3568e-22	44.4772	Not-significant
BEST1	0.720913	12.526	3.11275e-24	1.41787e-22	44.4313	Not-significant
PXMP2	-1.72229	-12.5244	3.14129e-24	1.42775e-22	44.4222	Down-regulated
LOC100129034	-0.911644	-12.5164	3.2906e-24	1.49236e-22	44.376	Down-regulated
ADPRH	0.828947	12.5024	3.56747e-24	1.61442e-22	44.2957	Not-significant
CTSK	2.26568	12.4984	3.65138e-24	1.64881e-22	44.2726	Up-regulated
LINC01127	-1.54616	-12.4976	3.66778e-24	1.65264e-22	44.2681	Down-regulated
BIVM	-1.287	-12.492	3.78778e-24	1.70303e-22	44.2361	Down-regulated
PLAAT2	-4.85343	-12.4888	3.8591e-24	1.73137e-22	44.2176	Down-regulated
TIMP1	2.06202	12.4871	3.89589e-24	1.74412e-22	44.2081	Up-regulated
VAMP2	1.11081	12.4855	3.93315e-24	1.75703e-22	44.1987	Up-regulated
ACER2	-4.42151	-12.483	3.98948e-24	1.77662e-22	44.1845	Down-regulated
LIPH	-2.91797	-12.4828	3.99402e-24	1.77662e-22	44.1834	Down-regulated
PIP4K2C	-1.20928	-12.4715	4.26279e-24	1.89213e-22	44.1187	Down-regulated
GANAB	0.953856	12.4705	4.28956e-24	1.89997e-22	44.1124	Up-regulated
SEC24A	-1.4119	-12.4696	4.31028e-24	1.90511e-22	44.1077	Down-regulated
SNRNP40	-1.10891	-12.4675	4.36447e-24	1.92498e-22	44.0952	Down-regulated
ZBTB38	1.47086	12.463	4.47921e-24	1.97142e-22	44.0694	Up-regulated
UBXN7	1.28314	12.4547	4.69945e-24	2.064e-22	44.0217	Up-regulated
MTLN	-1.10494	-12.4395	5.12815e-24	2.24755e-22	43.9349	Down-regulated
GXYLT2	3.60708	12.4218	5.68131e-24	2.48477e-22	43.8331	Up-regulated
RMST	-1.88008	-12.4189	5.77846e-24	2.52197e-22	43.8162	Down-regulated
THSD4	-1.90888	-12.4149	5.91352e-24	2.57553e-22	43.7932	Down-regulated
RENBP	1.41087	12.4123	6.00289e-24	2.60901e-22	43.7783	Up-regulated
MUC12-AS1	-1.22487	-12.4072	6.18132e-24	2.68097e-22	43.7492	Down-regulated
CLMN	-1.74895	-12.3986	6.49696e-24	2.81202e-22	43.6997	Down-regulated
ARHGEF37	-2.07614	-12.388	6.90774e-24	2.98067e-22	43.6388	Down-regulated
CYP3A43	-1.43899	-12.3878	6.91518e-24	2.98067e-22	43.6377	Down-regulated
USF3	-1.116	-12.387	6.94693e-24	2.98818e-22	43.6331	Down-regulated
SYTL2	-2.2435	-12.3784	7.29756e-24	3.13254e-22	43.5842	Down-regulated
CYTH1	-1.09011	-12.3776	7.33143e-24	3.14062e-22	43.5796	Down-regulated
ZNF562	-1.00328	-12.3727	7.54532e-24	3.22563e-22	43.551	Down-regulated
B4GALT4	-1.83431	-12.3613	8.05728e-24	3.43744e-22	43.4857	Down-regulated
FOSL2	-1.31	-12.3606	8.09197e-24	3.4452e-22	43.4814	Down-regulated
SAMD1	1.10704	12.3487	8.66709e-24	3.68254e-22	43.4132	Up-regulated
SLC1A5	1.25172	12.3438	8.91315e-24	3.7794e-22	43.3854	Up-regulated
PTPRJ	-1.37329	-12.339	9.16438e-24	3.87804e-22	43.3577	Down-regulated
ZDHHC3	-1.28326	-12.3343	9.4162e-24	3.97653e-22	43.3308	Down-regulated
CPNE2	1.64541	12.3331	9.48284e-24	3.99658e-22	43.3238	Up-regulated
UQCR10	-0.964185	-12.3292	9.70145e-24	4.08048e-22	43.3011	Down-regulated
PLPPR2	0.868317	12.3287	9.72996e-24	4.08423e-22	43.2982	Not-significant
PPP1R15A	1.18261	12.3175	1.0379e-23	4.34793e-22	43.234	Up-regulated
LOC643201	-1.21884	-12.3141	1.05832e-23	4.42458e-22	43.2146	Down-regulated
TOB1-AS1	-0.625905	-12.3115	1.07437e-23	4.48268e-22	43.1997	Not-significant
FAM201A	-1.42659	-12.3091	1.08961e-23	4.53723e-22	43.1857	Down-regulated
ERVH-1	0.796784	12.304	1.12231e-23	4.66409e-22	43.1563	Not-significant
ARIH2	-1.18282	-12.299	1.15477e-23	4.78942e-22	43.1279	Down-regulated
BLVRB	-1.42209	-12.2959	1.17566e-23	4.86638e-22	43.1101	Down-regulated
COL4A1	2.09935	12.2931	1.19522e-23	4.93756e-22	43.0937	Up-regulated
MBOAT1	-1.93721	-12.2815	1.27773e-23	5.26799e-22	43.0273	Down-regulated
SETD4	-0.981849	-12.28	1.28892e-23	5.30365e-22	43.0187	Down-regulated
KDM7A	-1.30738	-12.277	1.31115e-23	5.38448e-22	43.0017	Down-regulated
GAST	-5.45189	-12.2761	1.31818e-23	5.40273e-22	42.9963	Down-regulated
CCDC32	-0.779335	-12.275	1.3269e-23	5.42781e-22	42.9898	Not-significant
GATA6-AS1	-2.91683	-12.2701	1.36464e-23	5.57127e-22	42.9619	Down-regulated
CBX8	0.864212	12.2651	1.40463e-23	5.72332e-22	42.9332	Not-significant
HADH	-1.35371	-12.2588	1.45704e-23	5.92531e-22	42.8968	Down-regulated
MSANTD2-AS1	-0.840167	-12.2581	1.4629e-23	5.93755e-22	42.8928	Not-significant
SPSB1	1.4416	12.2426	1.60005e-23	6.4816e-22	42.8037	Up-regulated
SCIN	-4.07935	-12.2367	1.65605e-23	6.69543e-22	42.7695	Down-regulated
TEX9	-1.91113	-12.2319	1.70182e-23	6.86717e-22	42.7424	Down-regulated
ZNF396	-1.01671	-12.2294	1.72726e-23	6.9564e-22	42.7276	Down-regulated
GPRC5D-AS1	-1.36228	-12.2227	1.79553e-23	7.21739e-22	42.6891	Down-regulated
PPCDC	-1.20116	-12.2219	1.80338e-23	7.23502e-22	42.6848	Down-regulated
MTIF3	-0.973253	-12.2205	1.81766e-23	7.27833e-22	42.6769	Down-regulated
CHP1	-1.30084	-12.219	1.83396e-23	7.32032e-22	42.6681	Down-regulated
CCSER1	-1.6561	-12.2189	1.83517e-23	7.32032e-22	42.6674	Down-regulated
FMNL1	1.06854	12.2153	1.87346e-23	7.4588e-22	42.6469	Up-regulated
SANBR	-1.32721	-12.2123	1.90618e-23	7.57462e-22	42.6297	Down-regulated
ZSCAN4	-1.71641	-12.209	1.94329e-23	7.7074e-22	42.6105	Down-regulated
VPS13A	-1.43385	-12.2085	1.94833e-23	7.71271e-22	42.6079	Down-regulated
GRIK5	0.802479	12.1983	2.0678e-23	8.17018e-22	42.5488	Not-significant
SPI1	1.40257	12.1927	2.13549e-23	8.42167e-22	42.5167	Up-regulated
NIPAL2	-1.42819	-12.1923	2.14006e-23	8.42376e-22	42.5146	Down-regulated
NIPSNAP3A	-1.42732	-12.1841	2.2443e-23	8.81743e-22	42.4673	Down-regulated
LAPTM5	1.79823	12.1658	2.49455e-23	9.7822e-22	42.3622	Up-regulated
COL1A2	2.20252	12.162	2.54948e-23	9.97299e-22	42.3406	Up-regulated
MMUT	-1.25428	-12.1618	2.55277e-23	9.97299e-22	42.3393	Down-regulated
SELENON	1.11183	12.1598	2.58326e-23	1.00733e-21	42.3275	Up-regulated
CNNM4	-1.5473	-12.1585	2.60241e-23	1.0129e-21	42.3202	Down-regulated
GCKR	-1.42467	-12.1501	2.73218e-23	1.06143e-21	42.2718	Down-regulated
METTL15	-0.984409	-12.1456	2.80332e-23	1.08704e-21	42.2462	Down-regulated
OSGIN2	1.33043	12.1451	2.81136e-23	1.08814e-21	42.2434	Up-regulated
PPIP5K2	-1.42412	-12.1402	2.89294e-23	1.11703e-21	42.215	Down-regulated
IL11	0.712939	12.14	2.89672e-23	1.11703e-21	42.2137	Not-significant
PPTC7	0.982692	12.1387	2.91827e-23	1.12171e-21	42.2063	Up-regulated
NECAP1	-1.04058	-12.1386	2.9196e-23	1.12171e-21	42.2058	Down-regulated
SCP2	-1.29829	-12.134	2.99832e-23	1.14901e-21	42.1794	Down-regulated
RUSF1	1.08155	12.1338	3.00169e-23	1.14901e-21	42.1783	Up-regulated
ZBTB34	-1.11308	-12.1314	3.04446e-23	1.16325e-21	42.1642	Down-regulated
CHKA	-1.30253	-12.1203	3.24633e-23	1.23811e-21	42.1004	Down-regulated
ADGRG2	-3.92553	-12.1159	3.32931e-23	1.26745e-21	42.0753	Down-regulated
ASXL2	1.0974	12.1127	3.39256e-23	1.28917e-21	42.0566	Up-regulated
YTHDF3-DT	-0.796444	-12.1026	3.59583e-23	1.36393e-21	41.9988	Not-significant
LINC02481	-1.00409	-12.1022	3.60393e-23	1.36452e-21	41.9965	Down-regulated
ERGIC1	-1.2324	-12.1007	3.63513e-23	1.37384e-21	41.988	Down-regulated
GRAMD4	-1.2599	-12.0982	3.68763e-23	1.39116e-21	41.9737	Down-regulated
MIR29B2CHG	-2.33415	-12.0944	3.77029e-23	1.41978e-21	41.9517	Down-regulated
VPS53	-0.705677	-12.092	3.82403e-23	1.43742e-21	41.9376	Not-significant
IRF2BP1	1.00422	12.0906	3.85421e-23	1.44616e-21	41.9298	Up-regulated
EGR2	2.49471	12.0796	4.1069e-23	1.53821e-21	41.8667	Up-regulated
TADA3	0.805061	12.0793	4.11499e-23	1.53848e-21	41.8647	Not-significant
RUNDC1	-0.991128	-12.0757	4.2025e-23	1.56838e-21	41.8438	Down-regulated
KBTBD12	-2.28504	-12.0731	4.26426e-23	1.58859e-21	41.8293	Down-regulated
RAB27A	-2.15527	-12.0717	4.29914e-23	1.59873e-21	41.8212	Down-regulated
SCGB2A1	-5.27511	-12.0621	4.54523e-23	1.68723e-21	41.7659	Down-regulated
THBS2	3.78591	12.0575	4.66822e-23	1.72981e-21	41.7393	Up-regulated
CEBPD	1.34013	12.0525	4.80627e-23	1.77781e-21	41.7103	Up-regulated
LILRB1	1.4111	12.0504	4.8638e-23	1.7959e-21	41.6985	Up-regulated
MAL	-3.21816	-12.0474	4.94966e-23	1.82438e-21	41.6811	Down-regulated
LINC01560	-1.09945	-12.0368	5.2611e-23	1.93575e-21	41.6205	Down-regulated
KCNK10	-1.55562	-12.0212	5.76118e-23	2.11601e-21	41.5302	Down-regulated
TMEM242	-0.686957	-12.0208	5.77287e-23	2.11658e-21	41.5282	Not-significant
ELOVL6	-3.08445	-12.0155	5.95182e-23	2.1765e-21	41.4978	Down-regulated
IGSF9	-2.43722	-12.0154	5.95716e-23	2.1765e-21	41.497	Down-regulated
CLDN19	0.670285	12.012	6.07627e-23	2.21614e-21	41.4773	Not-significant
EIF1AD	-0.871513	-12.0097	6.15794e-23	2.242e-21	41.464	Not-significant
GRAMD1C	-2.54942	-12.0061	6.28494e-23	2.28426e-21	41.4437	Down-regulated
NCKAP5L	1.04034	11.9968	6.63346e-23	2.40674e-21	41.3901	Up-regulated
NT5DC2	1.88093	11.9921	6.81735e-23	2.46916e-21	41.3629	Up-regulated
COPG2	-1.42509	-11.9914	6.84304e-23	2.47417e-21	41.3591	Down-regulated
GUCY1A1	3.17824	11.9904	6.88279e-23	2.48423e-21	41.3534	Up-regulated
ARHGDIB	1.58576	11.9872	7.01377e-23	2.52714e-21	41.3347	Up-regulated
DDA1	1.08262	11.9793	7.34046e-23	2.64029e-21	41.2894	Up-regulated
FN1	3.0659	11.9743	7.55607e-23	2.71316e-21	41.2606	Up-regulated
PRICKLE3	0.896202	11.9712	7.69121e-23	2.75694e-21	41.243	Not-significant
WDR20	-0.941938	-11.9617	8.12699e-23	2.90815e-21	41.1882	Down-regulated
ZKSCAN1	-1.48932	-11.9488	8.75744e-23	3.12825e-21	41.114	Down-regulated
MOB3B	-1.69816	-11.9485	8.77205e-23	3.12825e-21	41.1123	Down-regulated
RGP1	-0.848693	-11.9458	8.91146e-23	3.17254e-21	41.0966	Not-significant
CERCAM	1.82643	11.9448	8.96387e-23	3.18576e-21	41.0908	Up-regulated
CTHRC1	3.51622	11.9359	9.43733e-23	3.34833e-21	41.0396	Up-regulated
PLEKHH1	-2.36095	-11.934	9.54138e-23	3.37658e-21	41.0287	Down-regulated
EYA3	-0.665651	-11.9336	9.56341e-23	3.37658e-21	41.0265	Not-significant
SRGAP1	1.24986	11.9336	9.56551e-23	3.37658e-21	41.0262	Up-regulated
TEKT5	-0.749735	-11.9321	9.64695e-23	3.39957e-21	41.0178	Not-significant
ERAL1	1.06835	11.9286	9.84452e-23	3.46334e-21	40.9977	Up-regulated
CXCR4	2.34202	11.9278	9.8924e-23	3.47433e-21	40.9928	Up-regulated
FAP	3.28414	11.9269	9.94244e-23	3.48604e-21	40.9878	Up-regulated
ARPC2	-0.768674	-11.9178	1.04812e-22	3.66879e-21	40.9354	Not-significant
NPEPPS	-0.86124	-11.9143	1.06982e-22	3.73844e-21	40.915	Not-significant
MED7	-1.01221	-11.9112	1.08889e-22	3.79872e-21	40.8974	Down-regulated
CAPN13	-1.56678	-11.9105	1.09366e-22	3.809e-21	40.8931	Down-regulated
VPS52	0.607788	11.9093	1.10076e-22	3.82734e-21	40.8867	Not-significant
NPAS2	-1.48806	-11.9058	1.12357e-22	3.90015e-21	40.8663	Down-regulated
PPP1R13B	-1.01273	-11.9013	1.15292e-22	3.99537e-21	40.8406	Down-regulated
LOC100289230	-0.965893	-11.8971	1.18127e-22	4.08686e-21	40.8165	Down-regulated
ABI3	0.928328	11.8915	1.2203e-22	4.21489e-21	40.7842	Up-regulated
MFSD8	-1.31785	-11.889	1.23853e-22	4.26908e-21	40.7695	Down-regulated
WDR11	-1.02081	-11.8888	1.24008e-22	4.26908e-21	40.7682	Down-regulated
STARD4	-1.83245	-11.8866	1.25585e-22	4.31624e-21	40.7556	Down-regulated
DNAJC3-DT	-1.40492	-11.8821	1.28906e-22	4.42308e-21	40.7297	Down-regulated
LOC100505851	-0.713863	-11.8763	1.33305e-22	4.56573e-21	40.6964	Not-significant
CAMK2D	-1.08653	-11.876	1.33501e-22	4.56573e-21	40.6949	Down-regulated
PLEKHB2	-1.15354	-11.8739	1.3515e-22	4.61457e-21	40.6827	Down-regulated
EAF1	-1.45995	-11.8724	1.36361e-22	4.6483e-21	40.6738	Down-regulated
LIMD1	-0.922381	-11.8694	1.38721e-22	4.72102e-21	40.6568	Down-regulated
SULF1	3.5008	11.8671	1.4059e-22	4.77684e-21	40.6435	Up-regulated
COX8A	-0.829556	-11.8663	1.41259e-22	4.79177e-21	40.6388	Not-significant
PET100	-0.897235	-11.8547	1.51006e-22	5.11412e-21	40.5724	Not-significant
PMM1	-1.12635	-11.8544	1.51279e-22	5.11504e-21	40.5706	Down-regulated
LINC01184	-1.57627	-11.8533	1.52286e-22	5.14075e-21	40.564	Down-regulated
PTPRA	0.907421	11.8438	1.60913e-22	5.42321e-21	40.5093	Up-regulated
LMF2	0.716246	11.8412	1.63328e-22	5.49571e-21	40.4945	Not-significant
TRIM33	-1.44315	-11.8401	1.64412e-22	5.5233e-21	40.4879	Down-regulated
TDH-AS1	0.941554	11.8391	1.65324e-22	5.54498e-21	40.4824	Up-regulated
FZD2	0.892804	11.8363	1.68022e-22	5.62646e-21	40.4663	Not-significant
AGAP2-AS1	1.36714	11.8348	1.69457e-22	5.66542e-21	40.4579	Up-regulated
EHMT2	1.12544	11.8299	1.74363e-22	5.82011e-21	40.4295	Up-regulated
MED18	-1.04082	-11.8286	1.75742e-22	5.85676e-21	40.4217	Down-regulated
NOTCH3	2.53375	11.826	1.78325e-22	5.93336e-21	40.4072	Up-regulated
TMEM127	-0.632527	-11.8224	1.82153e-22	6.05109e-21	40.386	Not-significant
USP13	1.33563	11.8117	1.93742e-22	6.42583e-21	40.3247	Up-regulated
SEC16A	-1.00972	-11.8065	1.99713e-22	6.61334e-21	40.2946	Down-regulated
RDH12	-2.51701	-11.8043	2.02231e-22	6.6853e-21	40.2821	Down-regulated
CPSF7	0.712275	11.8041	2.02526e-22	6.6853e-21	40.2807	Not-significant
RELT	0.771562	11.803	2.03738e-22	6.71467e-21	40.2747	Not-significant
C1QC	1.8375	11.7985	2.09166e-22	6.8827e-21	40.2486	Up-regulated
ILF3-DT	-1.41869	-11.7982	2.09543e-22	6.88422e-21	40.2468	Down-regulated
NAALADL2	-1.20824	-11.7961	2.12125e-22	6.95809e-21	40.2347	Down-regulated
SNX14	-1.31465	-11.7952	2.13248e-22	6.98396e-21	40.2294	Down-regulated
RFTN2	0.713141	11.7931	2.15875e-22	7.05892e-21	40.2172	Not-significant
SOCS3	2.30604	11.7908	2.18699e-22	7.13349e-21	40.2043	Up-regulated
TRIM68	-1.03396	-11.7907	2.1884e-22	7.13349e-21	40.2037	Down-regulated
BRAP	-0.842994	-11.7833	2.28485e-22	7.43628e-21	40.1608	Not-significant
PDPN	2.11533	11.778	2.35523e-22	7.6534e-21	40.1307	Up-regulated
MICALL2	-1.20565	-11.7721	2.43681e-22	7.89741e-21	40.0968	Down-regulated
PPIP5K1	-0.830479	-11.7721	2.43789e-22	7.89741e-21	40.0964	Not-significant
KAT14	-1.30321	-11.7596	2.62058e-22	8.47606e-21	40.0246	Down-regulated
ZNF223	-1.28778	-11.7555	2.68308e-22	8.66476e-21	40.0011	Down-regulated
C1orf198	1.41408	11.7549	2.69269e-22	8.68236e-21	39.9976	Up-regulated
TRMT1L	-1.35809	-11.7545	2.69986e-22	8.69204e-21	39.9949	Down-regulated
QSOX1	-1.44128	-11.7538	2.70974e-22	8.7104e-21	39.9913	Down-regulated
LOC100129917	-0.953045	-11.7515	2.74639e-22	8.81465e-21	39.978	Down-regulated
COL17A1	-2.43502	-11.7493	2.78189e-22	8.91486e-21	39.9652	Down-regulated
S100A8	3.51086	11.748	2.8023e-22	8.96256e-21	39.9579	Up-regulated
UBE2B	-0.812487	-11.7478	2.80537e-22	8.96256e-21	39.9568	Not-significant
MPC1	-1.13662	-11.7389	2.95387e-22	9.42259e-21	39.9056	Down-regulated
ZNF506	-1.48119	-11.7378	2.97379e-22	9.47164e-21	39.8989	Down-regulated
MADD	-0.604377	-11.735	3.02258e-22	9.61236e-21	39.8827	Not-significant
ZNF341	-0.992154	-11.7326	3.06392e-22	9.72898e-21	39.8692	Down-regulated
MGC70870	-0.933417	-11.7307	3.09753e-22	9.82078e-21	39.8584	Down-regulated
ANKRD53	0.662882	11.7177	3.34128e-22	1.05775e-20	39.7831	Not-significant
PRDM16	-2.91854	-11.7125	3.44245e-22	1.08813e-20	39.7534	Down-regulated
TSSK3	0.603716	11.7113	3.46621e-22	1.09398e-20	39.7466	Not-significant
CKAP4	-1.21009	-11.7106	3.48054e-22	1.09684e-20	39.7425	Down-regulated
UPK1B	-4.86861	-11.7089	3.5161e-22	1.10638e-20	39.7324	Down-regulated
GOLGA3	-0.885542	-11.7047	3.60261e-22	1.13189e-20	39.7083	Not-significant
TRMT2B	1.37727	11.6942	3.8278e-22	1.20084e-20	39.648	Up-regulated
UGDH	-1.66016	-11.6937	3.83945e-22	1.20268e-20	39.645	Down-regulated
TMBIM6	-1.05415	-11.6914	3.89157e-22	1.21718e-20	39.6316	Down-regulated
EIF2AK3	-1.54541	-11.6908	3.90471e-22	1.21946e-20	39.6282	Down-regulated
ATRN	-1.41371	-11.6838	4.06656e-22	1.26811e-20	39.5879	Down-regulated
ABCD3	-1.46476	-11.6821	4.10522e-22	1.27826e-20	39.5785	Down-regulated
INSC	-2.06121	-11.6726	4.33879e-22	1.34897e-20	39.5235	Down-regulated
KCNK6	-1.35784	-11.6708	4.38337e-22	1.3608e-20	39.5133	Down-regulated
FPR1	2.23707	11.6663	4.49898e-22	1.39462e-20	39.4874	Up-regulated
SNF8	-0.744971	-11.6655	4.52194e-22	1.39965e-20	39.4824	Not-significant
FCGR3B	2.60241	11.6643	4.55119e-22	1.40662e-20	39.476	Up-regulated
SVIP	-1.41991	-11.6609	4.64262e-22	1.43276e-20	39.4562	Down-regulated
TMEM251	-0.952879	-11.6556	4.78877e-22	1.47568e-20	39.4254	Down-regulated
NT5C	-0.739271	-11.6518	4.89414e-22	1.50592e-20	39.4038	Not-significant
SMIM14	-1.67071	-11.6507	4.92478e-22	1.51312e-20	39.3976	Down-regulated
USF1	-1.03567	-11.6497	4.95385e-22	1.51981e-20	39.3917	Down-regulated
EHHADH	-1.79749	-11.6477	5.01101e-22	1.53509e-20	39.3803	Down-regulated
PIGH	-0.919861	-11.6454	5.07993e-22	1.55392e-20	39.3667	Down-regulated
CFDP1	-1.109	-11.645	5.08984e-22	1.55467e-20	39.3648	Down-regulated
SERF2	-0.494112	-11.6441	5.11792e-22	1.56097e-20	39.3593	Not-significant
MACIR	-1.89559	-11.6413	5.20181e-22	1.58424e-20	39.3432	Down-regulated
ZFP14	-0.573348	-11.6342	5.42068e-22	1.64849e-20	39.3022	Not-significant
CEP57L1	-0.782002	-11.6327	5.4687e-22	1.66035e-20	39.2935	Not-significant
RER1	-1.13448	-11.6324	5.4756e-22	1.66035e-20	39.2922	Down-regulated
LOC390705	-0.672521	-11.6302	5.546e-22	1.67926e-20	39.2795	Not-significant
CTSL	1.73185	11.6293	5.57564e-22	1.68578e-20	39.2742	Up-regulated
RAMAC	-1.12828	-11.6211	5.84799e-22	1.76557e-20	39.2268	Down-regulated
NDUFS7	-0.973191	-11.6175	5.96943e-22	1.79963e-20	39.2064	Down-regulated
EXOC6B	-1.09731	-11.6148	6.06402e-22	1.82551e-20	39.1908	Down-regulated
LOC100272217	-0.920742	-11.614	6.09494e-22	1.83217e-20	39.1857	Down-regulated
PLCB3	-1.0692	-11.6069	6.34817e-22	1.90555e-20	39.1453	Down-regulated
LOC105372480	-0.900173	-11.6051	6.41613e-22	1.92318e-20	39.1347	Down-regulated
SEMA3B	-1.54873	-11.6047	6.43086e-22	1.92483e-20	39.1324	Down-regulated
CCDC186	-1.72165	-11.6027	6.50422e-22	1.944e-20	39.1211	Down-regulated
SERPINE1	2.97089	11.6005	6.59086e-22	1.96707e-20	39.108	Up-regulated
C3	3.28239	11.5998	6.61437e-22	1.97127e-20	39.1044	Up-regulated
PAQR8	-1.95648	-11.5986	6.66319e-22	1.98299e-20	39.0971	Down-regulated
MFAP2	2.60118	11.5939	6.84831e-22	2.03518e-20	39.0699	Up-regulated
TRAF7	0.688455	11.5908	6.96971e-22	2.06831e-20	39.0524	Not-significant
TMEM176A	1.82132	11.5813	7.36468e-22	2.18241e-20	38.9977	Up-regulated
BTBD18	-0.787871	-11.5809	7.38024e-22	2.18392e-20	38.9956	Not-significant
LINC01342	-0.698182	-11.5748	7.64865e-22	2.26014e-20	38.9601	Not-significant
PPP4C	0.899667	11.5733	7.71459e-22	2.27502e-20	38.9515	Not-significant
SORBS3	1.22302	11.5732	7.72081e-22	2.27502e-20	38.9507	Up-regulated
TSPAN15	-1.60161	-11.5726	7.7464e-22	2.27934e-20	38.9474	Down-regulated
ATP1B3	1.46951	11.5679	7.95811e-22	2.33834e-20	38.9206	Up-regulated
FJX1	1.49623	11.5616	8.25816e-22	2.41986e-20	38.8839	Up-regulated
DAB2	2.05196	11.5615	8.25875e-22	2.41986e-20	38.8838	Up-regulated
CCNT2	-1.18216	-11.5598	8.34085e-22	2.44049e-20	38.874	Down-regulated
LAIR2	1.69761	11.559	8.38294e-22	2.44937e-20	38.869	Up-regulated
ZNF789	-1.32695	-11.5566	8.49839e-22	2.47963e-20	38.8554	Down-regulated
VEGFC	2.05947	11.5548	8.58593e-22	2.50081e-20	38.8452	Up-regulated
ZNF684	-0.891836	-11.5547	8.59495e-22	2.50081e-20	38.8441	Not-significant
DAPK2	-1.18174	-11.5497	8.84381e-22	2.56613e-20	38.8158	Down-regulated
MB21D2	-1.14626	-11.5497	8.84406e-22	2.56613e-20	38.8158	Down-regulated
TMEM192	0.954767	11.5479	8.93849e-22	2.58993e-20	38.8052	Up-regulated
ABHD2	-1.60506	-11.5422	9.23659e-22	2.67259e-20	38.7726	Down-regulated
KLHL36	-1.0247	-11.5334	9.72352e-22	2.80959e-20	38.7215	Down-regulated
NFE2L2	-1.14872	-11.527	1.00928e-21	2.91226e-20	38.6845	Down-regulated
CACNG4	0.677466	11.5258	1.016e-21	2.9276e-20	38.6779	Not-significant
MGST3	-1.24411	-11.5248	1.02178e-21	2.93927e-20	38.6723	Down-regulated
SMIM7	-0.768293	-11.5246	1.02287e-21	2.93927e-20	38.6712	Not-significant
CIR1	-0.826121	-11.5171	1.06876e-21	3.06693e-20	38.6276	Not-significant
DOK4	-1.85597	-11.5161	1.0746e-21	3.07945e-20	38.6222	Down-regulated
RALGDS	0.956893	11.5137	1.08981e-21	3.11875e-20	38.6082	Up-regulated
SLC16A9	-2.83407	-11.5115	1.10374e-21	3.15427e-20	38.5956	Down-regulated
NDUFA4L2	1.34257	11.5009	1.17411e-21	3.35079e-20	38.5342	Up-regulated
OCEL1	-0.875409	-11.4961	1.20676e-21	3.43926e-20	38.5069	Not-significant
ILK	1.57822	11.4949	1.21538e-21	3.45909e-20	38.4999	Up-regulated
RAB37	-1.88539	-11.4945	1.21837e-21	3.46289e-20	38.4974	Down-regulated
MRPS36	-1.0354	-11.4942	1.22055e-21	3.46438e-20	38.4956	Down-regulated
KANK4	-2.01902	-11.489	1.25802e-21	3.56588e-20	38.4656	Down-regulated
INO80C	-1.42854	-11.4851	1.28658e-21	3.64189e-20	38.4433	Down-regulated
TLCD2	-1.76007	-11.4773	1.34581e-21	3.80437e-20	38.3986	Down-regulated
RPL36A	-0.67885	-11.4697	1.40658e-21	3.97078e-20	38.3547	Not-significant
CTSLP8	1.20942	11.467	1.42882e-21	4.02813e-20	38.3391	Up-regulated
TLR4	1.42777	11.4638	1.45523e-21	4.0945e-20	38.3209	Up-regulated
NDUFA7	-0.966781	-11.4637	1.45629e-21	4.0945e-20	38.3202	Down-regulated
ZNF469	0.992885	11.462	1.47103e-21	4.13037e-20	38.3102	Up-regulated
CSTA	-2.80605	-11.46	1.48753e-21	4.17107e-20	38.2991	Down-regulated
LINC02693	-0.603147	-11.4579	1.50589e-21	4.2169e-20	38.2869	Not-significant
KDM3B	-0.743559	-11.4544	1.53682e-21	4.29774e-20	38.2667	Not-significant
H4C3	-1.7716	-11.4437	1.6352e-21	4.56673e-20	38.205	Down-regulated
SLC25A38	-0.778042	-11.4415	1.65668e-21	4.62053e-20	38.1921	Not-significant
PRMT7	-0.844074	-11.4411	1.66049e-21	4.62499e-20	38.1898	Not-significant
TMCC3	-1.93866	-11.4376	1.69435e-21	4.71301e-20	38.1697	Down-regulated
FSTL1	2.0497	11.4306	1.76451e-21	4.89743e-20	38.1294	Up-regulated
MED23	-0.948961	-11.4305	1.76535e-21	4.89743e-20	38.1289	Down-regulated
TMEM51	-0.957499	-11.4292	1.77881e-21	4.92822e-20	38.1214	Down-regulated
ERBIN	-1.36712	-11.4259	1.81357e-21	5.01786e-20	38.1021	Down-regulated
AASDH	-1.03745	-11.4221	1.85315e-21	5.1206e-20	38.0807	Down-regulated
ZNF652	-0.780887	-11.4188	1.88888e-21	5.21241e-20	38.0617	Not-significant
DNAJB2	-0.895037	-11.4173	1.9063e-21	5.25353e-20	38.0526	Not-significant
PIK3C2B	-1.02717	-11.4136	1.94684e-21	5.35817e-20	38.0317	Down-regulated
OSR2	2.8368	11.4004	2.1021e-21	5.77787e-20	37.9554	Up-regulated
FAM126B	-1.43475	-11.3925	2.20125e-21	6.04242e-20	37.9097	Down-regulated
RAD23A	0.85503	11.383	2.32508e-21	6.37395e-20	37.8553	Not-significant
GREM1	4.16886	11.3823	2.33468e-21	6.39187e-20	37.8512	Up-regulated
LATS1	-1.15544	-11.3772	2.4044e-21	6.57413e-20	37.8219	Down-regulated
ITGA5	2.88628	11.3768	2.41016e-21	6.57772e-20	37.8196	Up-regulated
SLC29A1	2.01957	11.3767	2.41202e-21	6.57772e-20	37.8188	Up-regulated
SPARC	2.02695	11.374	2.4496e-21	6.67149e-20	37.8034	Up-regulated
ZFP36	1.53919	11.3559	2.72038e-21	7.39928e-20	37.6993	Up-regulated
NR4A3	2.11448	11.3532	2.76304e-21	7.50555e-20	37.6838	Up-regulated
CHPF	1.06277	11.3407	2.97142e-21	8.06109e-20	37.6116	Up-regulated
APOBEC1	-3.68643	-11.3383	3.01381e-21	8.16548e-20	37.5975	Down-regulated
RCOR1	-1.22189	-11.3375	3.02736e-21	8.19155e-20	37.593	Down-regulated
PLEK	1.59052	11.3356	3.06065e-21	8.27088e-20	37.5822	Up-regulated
SMAD7	-1.15814	-11.3318	3.12963e-21	8.44635e-20	37.56	Down-regulated
FRAT1	-1.14844	-11.329	3.18025e-21	8.57187e-20	37.5441	Down-regulated
RCAN3	-1.63605	-11.3252	3.25031e-21	8.74941e-20	37.5224	Down-regulated
RBM25	-0.919271	-11.3198	3.35423e-21	9.01753e-20	37.4912	Down-regulated
LINC01686	0.56348	11.318	3.38988e-21	9.10164e-20	37.4806	Not-significant
ATXN2L	0.921167	11.3162	3.4246e-21	9.18302e-20	37.4705	Up-regulated
ZNF137P	-1.78774	-11.3095	3.56016e-21	9.53427e-20	37.432	Down-regulated
ADAMTS17	-1.78346	-11.3047	3.66065e-21	9.79082e-20	37.4043	Down-regulated
ABLIM1	-1.7674	-11.3027	3.70459e-21	9.89567e-20	37.3924	Down-regulated
PRB1	0.79511	11.3022	3.71523e-21	9.9114e-20	37.3896	Not-significant
USP3-AS1	-0.677455	-11.3002	3.75745e-21	1.00112e-19	37.3784	Not-significant
ACOX3	-1.00286	-11.299	3.78349e-21	1.00677e-19	37.3715	Down-regulated
CBX5	1.87579	11.2893	4.00295e-21	1.06382e-19	37.3155	Up-regulated
UEVLD	-1.10243	-11.2872	4.05239e-21	1.07558e-19	37.3033	Down-regulated
LRRC66	-3.69391	-11.2844	4.11974e-21	1.09207e-19	37.2869	Down-regulated
RHOQ	1.42903	11.2839	4.13047e-21	1.09353e-19	37.2843	Up-regulated
LOC101929356	-0.899389	-11.2822	4.17225e-21	1.10319e-19	37.2743	Not-significant
BMS1P20	-0.685994	-11.2808	4.20664e-21	1.11087e-19	37.2662	Not-significant
HMGCL	-0.767971	-11.2787	4.25804e-21	1.12302e-19	37.2541	Not-significant
ADAP2	1.33004	11.2767	4.30683e-21	1.13446e-19	37.2428	Up-regulated
PPFIBP2	-1.65311	-11.2565	4.84115e-21	1.27359e-19	37.1266	Down-regulated
TSPAN31	-0.937018	-11.2559	4.85762e-21	1.27632e-19	37.1232	Down-regulated
VIM	1.40577	11.2535	4.92593e-21	1.29264e-19	37.1093	Up-regulated
BBS4	-1.02547	-11.2508	5.0033e-21	1.31129e-19	37.0939	Down-regulated
ZCCHC8	-1.06321	-11.2471	5.11168e-21	1.33802e-19	37.0726	Down-regulated
LIAS	-1.22413	-11.2467	5.12422e-21	1.33962e-19	37.0701	Down-regulated
MYO1B	1.32367	11.239	5.35845e-21	1.3991e-19	37.0257	Up-regulated
SH2D2A	1.03432	11.2369	5.42414e-21	1.41212e-19	37.0136	Up-regulated
APH1B	0.88346	11.2369	5.42593e-21	1.41212e-19	37.0133	Not-significant
OCRL	-0.906632	-11.2368	5.42864e-21	1.41212e-19	37.0128	Down-regulated
PAK1	-0.901	-11.2276	5.72463e-21	1.48726e-19	36.9601	Down-regulated
IFNAR1	-0.815955	-11.2272	5.73824e-21	1.48894e-19	36.9577	Not-significant
SFXN1	-1.42635	-11.2233	5.86906e-21	1.52009e-19	36.9353	Down-regulated
OAZ2	0.952191	11.2232	5.87286e-21	1.52009e-19	36.9347	Up-regulated
GNAO1	1.25536	11.2168	6.0938e-21	1.57533e-19	36.898	Up-regulated
PAX6	-1.99544	-11.2161	6.12043e-21	1.58025e-19	36.8936	Down-regulated
C1R	2.32	11.2028	6.61165e-21	1.70497e-19	36.8169	Up-regulated
SAR1B	-1.23874	-11.2003	6.70678e-21	1.72737e-19	36.8027	Down-regulated
SREK1IP1	-1.11497	-11.1977	6.80736e-21	1.75111e-19	36.788	Down-regulated
SMIM22	-1.55497	-11.1973	6.82264e-21	1.75288e-19	36.7857	Down-regulated
GSTM4	2.08004	11.1949	6.92118e-21	1.77601e-19	36.7715	Up-regulated
C15orf65	-1.5484	-11.1924	7.02041e-21	1.79926e-19	36.7573	Down-regulated
LOC105371264	-1.10147	-11.1876	7.22002e-21	1.84815e-19	36.7295	Down-regulated
CEBPB	1.34856	11.1872	7.2374e-21	1.85033e-19	36.7271	Up-regulated
TFCP2L1	-1.79025	-11.1865	7.26716e-21	1.85566e-19	36.723	Down-regulated
WWP2	-0.982072	-11.1794	7.57105e-21	1.93089e-19	36.6823	Down-regulated
OASL	-2.0739	-11.1769	7.67917e-21	1.95608e-19	36.6682	Down-regulated
DUSP14	1.37364	11.1711	7.94431e-21	2.02115e-19	36.6345	Up-regulated
FMO4	-1.16673	-11.1675	8.11281e-21	2.0615e-19	36.6137	Down-regulated
TREH	-1.07968	-11.1657	8.19756e-21	2.0805e-19	36.6033	Down-regulated
ALDH2	-1.28089	-11.1547	8.73538e-21	2.21431e-19	36.5402	Down-regulated
SNAPC2	0.840573	11.1541	8.76427e-21	2.21894e-19	36.5369	Not-significant
TRAPPC2	-0.994634	-11.1506	8.94864e-21	2.26287e-19	36.5163	Down-regulated
CD248	1.96494	11.1391	9.56141e-21	2.41489e-19	36.4505	Up-regulated
LAMTOR3	-0.965042	-11.1343	9.83303e-21	2.48049e-19	36.4226	Down-regulated
FER1L4	-2.61414	-11.129	1.01396e-20	2.55474e-19	36.3921	Down-regulated
HTR4	0.589261	11.1288	1.0154e-20	2.55529e-19	36.3907	Not-significant
SESN2	1.0961	11.1261	1.03117e-20	2.59185e-19	36.3754	Up-regulated
ERICH5	-3.39587	-11.1235	1.04667e-20	2.62763e-19	36.3606	Down-regulated
COMTD1	-1.31469	-11.1204	1.06595e-20	2.67281e-19	36.3425	Down-regulated
PWWP2A	-0.939613	-11.1182	1.07928e-20	2.70299e-19	36.3301	Down-regulated
DMAP1	-0.729507	-11.1157	1.0952e-20	2.73958e-19	36.3156	Not-significant
MIGA2	-0.772415	-11.1024	1.18296e-20	2.95555e-19	36.239	Not-significant
GLOD4	-1.03078	-11.0914	1.26099e-20	3.14674e-19	36.1755	Down-regulated
NAGPA	-1.02339	-11.0888	1.28008e-20	3.19056e-19	36.1606	Down-regulated
BNIPL	-0.620692	-11.0839	1.31728e-20	3.27936e-19	36.1322	Not-significant
TMEM14A	-1.26934	-11.0818	1.33299e-20	3.31453e-19	36.1204	Down-regulated
PGRMC2	-1.17901	-11.0783	1.36007e-20	3.37783e-19	36.1004	Down-regulated
SMC5	-1.20476	-11.072	1.41102e-20	3.5002e-19	36.0639	Down-regulated
TTYH3	1.12823	11.0692	1.43375e-20	3.55237e-19	36.048	Up-regulated
TSC22D2	-1.01113	-11.0604	1.50926e-20	3.73502e-19	35.997	Down-regulated
PYY2	0.649042	11.0546	1.56035e-20	3.85688e-19	35.9639	Not-significant
HSD17B14	0.939584	11.0543	1.56328e-20	3.85955e-19	35.9621	Up-regulated
SETD2	-0.80156	-11.052	1.58468e-20	3.90776e-19	35.9486	Not-significant
TLN1	2.02567	11.0459	1.64145e-20	4.04295e-19	35.9136	Up-regulated
FRYL	-1.05154	-11.0446	1.65419e-20	4.06954e-19	35.9059	Down-regulated
MAP1B	3.08351	11.0436	1.66314e-20	4.08456e-19	35.9006	Up-regulated
TMOD3	-1.10864	-11.0435	1.66421e-20	4.08456e-19	35.8999	Down-regulated
HAPLN1	-1.16871	-11.043	1.66886e-20	4.09115e-19	35.8971	Down-regulated
ANG	-2.50004	-11.0376	1.7221e-20	4.21672e-19	35.866	Down-regulated
USP47	-0.853334	-11.0361	1.73746e-20	4.24934e-19	35.8571	Not-significant
CRADD	-0.816499	-11.0335	1.76416e-20	4.30959e-19	35.842	Not-significant
ZNF585B	-1.45972	-11.0289	1.81156e-20	4.4202e-19	35.8156	Down-regulated
TTC7A	-0.846184	-11.0284	1.81699e-20	4.42828e-19	35.8127	Not-significant
CEP162	-0.889671	-11.0275	1.82569e-20	4.44428e-19	35.8079	Not-significant
ABCD1	0.896843	11.0266	1.83537e-20	4.46264e-19	35.8027	Not-significant
CCDC85C	-1.28254	-11.0234	1.87052e-20	4.54281e-19	35.7838	Down-regulated
PCYT1A	-0.640981	-11.0228	1.87706e-20	4.5534e-19	35.7804	Not-significant
CCN4	3.33301	11.0207	1.90009e-20	4.60392e-19	35.7682	Up-regulated
SERPINH1	1.76786	11.0186	1.92249e-20	4.65279e-19	35.7566	Up-regulated
ZFAND6	-0.851929	-11.0162	1.94932e-20	4.71226e-19	35.7428	Not-significant
RHBDL2	-2.8023	-11.0144	1.97001e-20	4.75676e-19	35.7324	Down-regulated
SH2B3	1.16595	11.0109	2.01e-20	4.8477e-19	35.7124	Up-regulated
NUDT18	-0.885011	-11.0095	2.02726e-20	4.88369e-19	35.7039	Not-significant
C4orf33	-1.70214	-11.0016	2.12186e-20	5.10568e-19	35.6586	Down-regulated
ETFDH	-1.54402	-10.9993	2.15055e-20	5.16876e-19	35.6453	Down-regulated
TLN2	-1.16458	-10.9957	2.19608e-20	5.27054e-19	35.6244	Down-regulated
HOOK2	-1.29673	-10.9955	2.19795e-20	5.27054e-19	35.6236	Down-regulated
P3H1	1.26406	10.9939	2.21932e-20	5.31567e-19	35.614	Up-regulated
HERC2P7	-1.03364	-10.9873	2.30573e-20	5.51057e-19	35.576	Down-regulated
UBC	0.312908	10.9872	2.30598e-20	5.51057e-19	35.5759	Not-significant
PLEKHA7	-1.92377	-10.986	2.32314e-20	5.54524e-19	35.5686	Down-regulated
FBXO3	-1.14496	-10.9841	2.349e-20	5.60055e-19	35.5576	Down-regulated
KCNK5	-2.12974	-10.9805	2.39825e-20	5.71145e-19	35.537	Down-regulated
FAR1	-1.65388	-10.9793	2.41504e-20	5.74488e-19	35.53	Down-regulated
OLFML2B	2.50085	10.9775	2.4394e-20	5.79622e-19	35.5201	Up-regulated
PIGV	-0.86977	-10.9765	2.45387e-20	5.82395e-19	35.5142	Not-significant
GCN1	-0.64477	-10.976	2.46164e-20	5.83575e-19	35.5111	Not-significant
NMRK1	-1.29168	-10.9728	2.5072e-20	5.93702e-19	35.4928	Down-regulated
TRIM16L	0.53174	10.9707	2.53821e-20	6.00363e-19	35.4806	Not-significant
SLC26A6	0.905865	10.9696	2.55403e-20	6.03422e-19	35.4745	Up-regulated
SNRNP48	-0.889633	-10.9662	2.60479e-20	6.14718e-19	35.4549	Not-significant
SSNA1	-0.735769	-10.9646	2.6289e-20	6.19708e-19	35.4458	Not-significant
CAPN9	-4.1382	-10.9607	2.68962e-20	6.33306e-19	35.4231	Down-regulated
TAF1	-0.93173	-10.9587	2.72032e-20	6.39813e-19	35.4118	Down-regulated
LSP1	1.42481	10.9556	2.77048e-20	6.50877e-19	35.3937	Up-regulated
PMF1	0.864395	10.9535	2.80469e-20	6.58171e-19	35.3815	Not-significant
ZNF624	-0.830754	-10.9509	2.84719e-20	6.67395e-19	35.3665	Not-significant
SLC22A23	-2.08908	-10.9457	2.93394e-20	6.86956e-19	35.3367	Down-regulated
TCP11L1	0.558058	10.9358	3.10718e-20	7.26704e-19	35.2797	Not-significant
RC3H2	0.913812	10.9325	3.16693e-20	7.39849e-19	35.2608	Up-regulated
NME6	-0.888829	-10.925	3.30754e-20	7.71833e-19	35.2177	Not-significant
PET117	-1.58801	-10.9243	3.32117e-20	7.74148e-19	35.2136	Down-regulated
SLC41A2	-2.26478	-10.9224	3.35811e-20	7.81886e-19	35.2026	Down-regulated
ETNK1	-2.86932	-10.9143	3.51853e-20	8.18324e-19	35.1562	Down-regulated
RNASE4	-2.10779	-10.9109	3.58966e-20	8.33936e-19	35.1364	Down-regulated
LRIG2-DT	0.475542	10.908	3.65015e-20	8.47045e-19	35.1198	Not-significant
GLTP	-0.709492	-10.906	3.6917e-20	8.55736e-19	35.1085	Not-significant
NFKB2	1.09853	10.9021	3.77763e-20	8.74682e-19	35.0857	Up-regulated
KRBA2	0.700117	10.8991	3.84391e-20	8.89042e-19	35.0684	Not-significant
C11orf54	-1.4329	-10.8914	4.01844e-20	9.2838e-19	35.0243	Down-regulated
MAP3K9	-1.65579	-10.8899	4.05344e-20	9.3543e-19	35.0157	Down-regulated
LOC646214	-0.919049	-10.8865	4.13433e-20	9.53043e-19	34.9961	Down-regulated
PDGFRB	1.97746	10.8785	4.33056e-20	9.97177e-19	34.95	Up-regulated
CASP7	-1.75431	-10.878	4.34309e-20	9.98958e-19	34.9471	Down-regulated
FCER1G	1.81972	10.8775	4.35589e-20	1.0008e-18	34.9442	Up-regulated
LOC101927490	-0.576493	-10.871	4.52274e-20	1.03799e-18	34.9069	Not-significant
ALG3	0.98875	10.8705	4.53628e-20	1.03995e-18	34.9039	Up-regulated
JARID2	-0.688389	-10.8689	4.57718e-20	1.04818e-18	34.895	Not-significant
TTC22	-2.84488	-10.865	4.68113e-20	1.07081e-18	34.8727	Down-regulated
MCEE	-0.969035	-10.8587	4.85544e-20	1.10947e-18	34.8364	Down-regulated
PDZD3	-1.1492	-10.8564	4.92291e-20	1.12365e-18	34.8227	Down-regulated
LY86	1.49713	10.8531	5.01642e-20	1.14374e-18	34.804	Up-regulated
MFGE8	1.47749	10.8511	5.07511e-20	1.15586e-18	34.7924	Up-regulated
SMIM29	1.03375	10.8502	5.10259e-20	1.16085e-18	34.7871	Up-regulated
LPAR5	-1.6171	-10.8465	5.21303e-20	1.18469e-18	34.7658	Down-regulated
KRT12	-0.881305	-10.8435	5.30383e-20	1.20401e-18	34.7487	Not-significant
RARG	0.742394	10.8396	5.42444e-20	1.23005e-18	34.7263	Not-significant
ACACB	0.704563	10.8355	5.55477e-20	1.25824e-18	34.7027	Not-significant
LRRFIP2	-0.897184	-10.8342	5.59853e-20	1.26677e-18	34.695	Not-significant
PNN	-0.457862	-10.8278	5.8095e-20	1.31308e-18	34.6582	Not-significant
NFKBIA	1.03491	10.826	5.87086e-20	1.32531e-18	34.6478	Up-regulated
FAM13A-AS1	-0.814259	-10.8258	5.87631e-20	1.32531e-18	34.6469	Not-significant
MAP3K12	1.0347	10.8185	6.1302e-20	1.38108e-18	34.6049	Up-regulated
CD3E	1.48298	10.8177	6.15693e-20	1.38561e-18	34.6005	Up-regulated
ARFGEF1	-1.05929	-10.8135	6.30805e-20	1.41809e-18	34.5764	Down-regulated
SPG11	-0.930542	-10.809	6.47554e-20	1.45417e-18	34.5504	Down-regulated
SSTR1	-4.02461	-10.8078	6.52272e-20	1.46319e-18	34.5432	Down-regulated
MRPL23	-1.0121	-10.8066	6.56679e-20	1.47079e-18	34.5365	Down-regulated
HHIP	-3.0737	-10.8065	6.57069e-20	1.47079e-18	34.5359	Down-regulated
OSTF1	-1.12816	-10.806	6.5918e-20	1.47393e-18	34.5327	Down-regulated
RNASEL	-1.26093	-10.7988	6.87213e-20	1.53497e-18	34.4914	Down-regulated
NCF2	1.93898	10.7927	7.11954e-20	1.58853e-18	34.4563	Up-regulated
UQCR11	-0.680656	-10.7895	7.25048e-20	1.61602e-18	34.4382	Not-significant
ISYNA1	1.65395	10.7869	7.35943e-20	1.63855e-18	34.4234	Up-regulated
EVPLL	-0.555805	-10.7845	7.46395e-20	1.66005e-18	34.4093	Not-significant
SLTM	-1.0515	-10.7841	7.48179e-20	1.66225e-18	34.407	Down-regulated
VPS26C	-0.778262	-10.7704	8.09954e-20	1.79758e-18	34.3282	Not-significant
AFDN	-1.07845	-10.7686	8.18126e-20	1.81379e-18	34.3182	Down-regulated
USP28	-0.690244	-10.7683	8.19726e-20	1.81541e-18	34.3163	Not-significant
SGK2	-1.42221	-10.7587	8.66822e-20	1.91767e-18	34.2608	Down-regulated
TMEM165	0.899246	10.7576	8.72386e-20	1.92794e-18	34.2544	Not-significant
RFX1	0.678236	10.7563	8.78776e-20	1.94e-18	34.2472	Not-significant
MFSD11	-0.904287	-10.7498	9.12665e-20	2.01269e-18	34.2096	Down-regulated
PEA15	1.39675	10.749	9.16701e-20	2.01945e-18	34.2052	Up-regulated
TCAF1	-1.18968	-10.7483	9.20428e-20	2.02552e-18	34.2012	Down-regulated
KRBOX5	-1.0082	-10.748	9.21889e-20	2.0266e-18	34.1996	Down-regulated
SPCS3	-0.942612	-10.7473	9.25568e-20	2.03255e-18	34.1957	Down-regulated
KCNC3	0.777428	10.746	9.32556e-20	2.04574e-18	34.1882	Not-significant
FIP1L1	-1.00634	-10.7443	9.42078e-20	2.06446e-18	34.1781	Down-regulated
ATP8B1	-2.37628	-10.7413	9.58564e-20	2.09838e-18	34.1609	Down-regulated
SHROOM1	-1.29077	-10.7402	9.64551e-20	2.10927e-18	34.1547	Down-regulated
BTD	-0.985592	-10.7342	9.98735e-20	2.18097e-18	34.1201	Down-regulated
CTF1	1.12225	10.7341	9.99427e-20	2.18097e-18	34.1194	Up-regulated
FAM76A	-0.913376	-10.7335	1.00261e-19	2.18563e-18	34.1163	Down-regulated
ABCD4	-0.584019	-10.7299	1.02388e-19	2.22967e-18	34.0954	Not-significant
LOXL3	0.870753	10.7296	1.02556e-19	2.231e-18	34.0938	Not-significant
MIIP	0.666802	10.7235	1.0625e-19	2.30895e-18	34.0587	Not-significant
ZNF709	-1.01021	-10.7221	1.07089e-19	2.32475e-18	34.0509	Down-regulated
GJA4	1.29748	10.7218	1.07318e-19	2.32575e-18	34.0487	Up-regulated
C2CD5	-1.30504	-10.7217	1.07358e-19	2.32575e-18	34.0484	Down-regulated
CITED4	0.929675	10.7143	1.12035e-19	2.42456e-18	34.006	Up-regulated
TRAPPC5	-0.741707	-10.7089	1.15638e-19	2.49993e-18	33.9746	Not-significant
KLB	-1.28815	-10.7062	1.17468e-19	2.53687e-18	33.959	Down-regulated
SMIM27	-0.6321	-10.7048	1.18424e-19	2.55487e-18	33.9509	Not-significant
ZFP92	0.839501	10.7003	1.21512e-19	2.61878e-18	33.9254	Not-significant
CBR4	-1.09617	-10.6996	1.22051e-19	2.62768e-18	33.921	Down-regulated
HNRNPH1	-0.811651	-10.6966	1.24192e-19	2.67103e-18	33.9037	Not-significant
SLAMF6	1.13128	10.6961	1.24494e-19	2.67476e-18	33.9013	Up-regulated
SMAD3	-1.0878	-10.6895	1.29395e-19	2.77719e-18	33.863	Down-regulated
EP300-AS1	-2.32932	-10.6844	1.33254e-19	2.85709e-18	33.8338	Down-regulated
GBA2	-0.941342	-10.6839	1.33646e-19	2.86256e-18	33.8309	Down-regulated
CEP85L	-1.75833	-10.683	1.3433e-19	2.87424e-18	33.8258	Down-regulated
G6PC3	0.771696	10.6804	1.36345e-19	2.91437e-18	33.811	Not-significant
PTPRR	-2.51152	-10.6789	1.37583e-19	2.93782e-18	33.802	Down-regulated
FAM241A	-1.70503	-10.6725	1.42783e-19	3.04574e-18	33.7652	Down-regulated
CYB5A	-1.30881	-10.6721	1.43095e-19	3.04928e-18	33.763	Down-regulated
TMEM92	-1.33718	-10.6682	1.46363e-19	3.11573e-18	33.7406	Down-regulated
ADAMTS1	2.55282	10.6655	1.48639e-19	3.16097e-18	33.7253	Up-regulated
TAGLN	3.31603	10.6651	1.49027e-19	3.16598e-18	33.7227	Up-regulated
MBNL3	-1.88093	-10.6646	1.49406e-19	3.17082e-18	33.7202	Down-regulated
LINC00944	0.70561	10.6639	1.50061e-19	3.18148e-18	33.7158	Not-significant
LMO4	-1.43676	-10.6577	1.55493e-19	3.29e-18	33.6805	Down-regulated
COX7A2P2	-0.788572	-10.6577	1.55495e-19	3.29e-18	33.6805	Not-significant
SMYD5	0.78364	10.6502	1.62429e-19	3.43323e-18	33.6372	Not-significant
TMEM144	-1.79609	-10.645	1.67397e-19	3.53464e-18	33.6073	Down-regulated
TMEM101	-0.739035	-10.6409	1.71422e-19	3.61372e-18	33.5837	Not-significant
PTS	-1.04936	-10.6408	1.71488e-19	3.61372e-18	33.5833	Down-regulated
MMP2	2.34249	10.6394	1.72881e-19	3.6394e-18	33.5753	Up-regulated
CDC14B	-1.3527	-10.6315	1.80967e-19	3.80579e-18	33.5299	Down-regulated
NUCB2	-1.55435	-10.6287	1.83926e-19	3.86411e-18	33.5138	Down-regulated
MGST2	-1.25955	-10.6266	1.86121e-19	3.9063e-18	33.502	Down-regulated
ADRB2	-1.92747	-10.6257	1.87181e-19	3.9246e-18	33.4963	Down-regulated
HMGCR	-1.73289	-10.6252	1.87714e-19	3.93181e-18	33.4935	Down-regulated
FHDC1	-1.12844	-10.6238	1.89237e-19	3.95975e-18	33.4855	Down-regulated
JOSD2	0.891152	10.6201	1.93273e-19	4.04015e-18	33.4645	Not-significant
UQCRQ	-0.819564	-10.6136	2.00773e-19	4.19272e-18	33.4267	Not-significant
TMEM256	-0.820465	-10.6107	2.04059e-19	4.25708e-18	33.4106	Not-significant
SPIDR	1.71409	10.6061	2.09592e-19	4.36814e-18	33.3841	Up-regulated
FNBP1L	-1.60788	-10.6059	2.09889e-19	4.36997e-18	33.3827	Down-regulated
RIN3	1.15826	10.6049	2.11038e-19	4.3895e-18	33.3772	Up-regulated
MRPL52	-0.988973	-10.6045	2.11547e-19	4.39571e-18	33.3748	Down-regulated
MYZAP	-1.89171	-10.6016	2.1512e-19	4.4655e-18	33.3582	Down-regulated
JUNB	1.38682	10.5954	2.2298e-19	4.62406e-18	33.3226	Up-regulated
GRAMD1B	-1.20172	-10.5941	2.24729e-19	4.6557e-18	33.3148	Down-regulated
OSBPL7	-1.72375	-10.5875	2.33488e-19	4.83236e-18	33.2769	Down-regulated
FANCC	-0.703568	-10.5866	2.34657e-19	4.85175e-18	33.2719	Not-significant
IKZF2	-1.67779	-10.5745	2.51605e-19	5.19701e-18	33.2027	Down-regulated
STX19	-2.16399	-10.5735	2.53113e-19	5.223e-18	33.1967	Down-regulated
RAD51-AS1	-0.913162	-10.573	2.53926e-19	5.23458e-18	33.1935	Down-regulated
OTUD5	0.533361	10.5707	2.57196e-19	5.29677e-18	33.1808	Not-significant
ZNF654	-1.00802	-10.57	2.58298e-19	5.31422e-18	33.1766	Down-regulated
RIOK3	-1.38607	-10.5695	2.59004e-19	5.32349e-18	33.1739	Down-regulated
GAL3ST1	-1.40896	-10.569	2.59785e-19	5.33428e-18	33.1709	Down-regulated
GUCD1	-0.954515	-10.5657	2.64861e-19	5.43317e-18	33.1517	Down-regulated
ZNF112	-1.24349	-10.5578	2.77203e-19	5.68075e-18	33.1065	Down-regulated
EPM2AIP1	-1.42354	-10.5532	2.8458e-19	5.82621e-18	33.0804	Down-regulated
AACS	-1.27255	-10.5522	2.86253e-19	5.85473e-18	33.0746	Down-regulated
FAM120A	-0.762097	-10.5446	2.99136e-19	6.11223e-18	33.0309	Not-significant
MOCS2-DT	-0.590967	-10.5421	3.03516e-19	6.19564e-18	33.0164	Not-significant
NR4A1	1.64958	10.5411	3.0522e-19	6.22435e-18	33.0109	Up-regulated
HSF1	0.816717	10.5394	3.08321e-19	6.28143e-18	33.0008	Not-significant
SUN1	-1.01843	-10.5362	3.13973e-19	6.38473e-18	32.9828	Down-regulated
NOL4	-0.975723	-10.5362	3.14003e-19	6.38473e-18	32.9827	Down-regulated
UBL3	-1.47154	-10.5318	3.22064e-19	6.54226e-18	32.9575	Down-regulated
CHST12	0.974208	10.5304	3.24828e-19	6.59198e-18	32.949	Up-regulated
STK16	-0.697013	-10.5251	3.34858e-19	6.78892e-18	32.9189	Not-significant
TMEM11	-0.614522	-10.5211	3.42632e-19	6.93651e-18	32.8961	Not-significant
SYTL5	-4.22101	-10.5211	3.42802e-19	6.93651e-18	32.8956	Down-regulated
ERLIN1	-1.11349	-10.5127	3.59751e-19	7.2724e-18	32.8477	Down-regulated
JUND	0.950219	10.5084	3.68931e-19	7.45076e-18	32.8226	Up-regulated
YIPF5	-0.994646	-10.5068	3.72281e-19	7.51115e-18	32.8137	Down-regulated
ISLR	2.87226	10.5049	3.76376e-19	7.58643e-18	32.8028	Up-regulated
WDR37	-0.711911	-10.502	3.82731e-19	7.70708e-18	32.7862	Not-significant
OVOL2	-2.33329	-10.5009	3.85268e-19	7.75069e-18	32.7796	Down-regulated
PLCXD1	-1.69595	-10.5006	3.85789e-19	7.75368e-18	32.7783	Down-regulated
CD14	1.80282	10.4981	3.91527e-19	7.86144e-18	32.7636	Up-regulated
GUCY1B1	2.36653	10.4951	3.98391e-19	7.99157e-18	32.7464	Up-regulated
WSB2	-0.856175	-10.4921	4.05244e-19	8.12122e-18	32.7294	Not-significant
DNAJC5	-0.864357	-10.4917	4.06269e-19	8.13396e-18	32.7269	Not-significant
KIAA0319L	-0.835305	-10.4839	4.25067e-19	8.50216e-18	32.682	Not-significant
PSMB6	-0.691683	-10.4825	4.28358e-19	8.55977e-18	32.6744	Not-significant
DIAPH3-AS1	0.38191	10.4792	4.3673e-19	8.71872e-18	32.6551	Not-significant
TMEM220	-1.86005	-10.4784	4.3858e-19	8.74729e-18	32.651	Down-regulated
ZNF585A	-1.01077	-10.4782	4.39165e-19	8.75058e-18	32.6496	Down-regulated
LINC02615	-1.36622	-10.4758	4.45285e-19	8.86406e-18	32.6359	Down-regulated
HGH1	0.890381	10.4735	4.51168e-19	8.9716e-18	32.6229	Not-significant
AGO4	-1.27266	-10.4734	4.51547e-19	8.9716e-18	32.622	Down-regulated
STRN	-1.00081	-10.4728	4.53053e-19	8.99294e-18	32.6187	Down-regulated
USP4	-0.679507	-10.466	4.7124e-19	9.34506e-18	32.5796	Not-significant
CSDC2	0.840293	10.4601	4.87562e-19	9.65956e-18	32.5458	Not-significant
RAB4A	-0.878682	-10.4592	4.90248e-19	9.70355e-18	32.5404	Not-significant
SRSF9	-0.583982	-10.4585	4.92101e-19	9.73101e-18	32.5366	Not-significant
FCGR1B	2.35304	10.4553	5.01286e-19	9.90325e-18	32.5183	Up-regulated
DDX60	-2.55632	-10.4452	5.31468e-19	1.04896e-17	32.4602	Down-regulated
ECM1	1.61384	10.4436	5.36534e-19	1.05796e-17	32.4508	Up-regulated
SUMO4	-0.612792	-10.4423	5.40372e-19	1.06452e-17	32.4437	Not-significant
LILRA2	0.639915	10.4406	5.45925e-19	1.07444e-17	32.4336	Not-significant
PGGT1B	-1.34427	-10.4391	5.50682e-19	1.08278e-17	32.425	Down-regulated
ZNF621	-0.827014	-10.4355	5.62088e-19	1.10417e-17	32.4046	Not-significant
KMT5A	0.741665	10.4344	5.6572e-19	1.11026e-17	32.3982	Not-significant
TMEM263	-1.12808	-10.4321	5.73307e-19	1.12409e-17	32.385	Down-regulated
TMEM160	-0.89242	-10.4318	5.74254e-19	1.12489e-17	32.3834	Not-significant
NDUFA1	-0.734177	-10.4276	5.88283e-19	1.15129e-17	32.3594	Not-significant
USE1	-0.950335	-10.4263	5.92859e-19	1.15916e-17	32.3517	Down-regulated
ZMYM5	-1.37592	-10.4258	5.9465e-19	1.16157e-17	32.3487	Down-regulated
CHN1	1.67915	10.4244	5.99488e-19	1.16993e-17	32.3407	Up-regulated
ZBTB7C	-1.98637	-10.4239	6.01109e-19	1.17182e-17	32.338	Down-regulated
CACNG8	0.576355	10.4238	6.01582e-19	1.17182e-17	32.3372	Not-significant
MRPL4	1.01789	10.4234	6.0288e-19	1.17325e-17	32.3351	Up-regulated
ASPHD2	-2.46393	-10.4193	6.17341e-19	1.20028e-17	32.3116	Down-regulated
LOC105371046	-0.71669	-10.4174	6.24254e-19	1.21259e-17	32.3005	Not-significant
BCAS1	-3.39304	-10.4169	6.25847e-19	1.21455e-17	32.298	Down-regulated
DAPK3	1.31852	10.4167	6.2647e-19	1.21463e-17	32.297	Up-regulated
LTN1	-1.01718	-10.4128	6.4108e-19	1.2418e-17	32.2741	Down-regulated
CTTN	-1.04248	-10.412	6.43925e-19	1.24616e-17	32.2697	Down-regulated
CLPTM1	0.72638	10.4113	6.46419e-19	1.24982e-17	32.2659	Not-significant
SMARCD1	0.604839	10.4107	6.48809e-19	1.25328e-17	32.2622	Not-significant
MKNK2	-1.01166	-10.4087	6.56084e-19	1.26616e-17	32.2511	Down-regulated
CCDC93	-0.73731	-10.4046	6.71955e-19	1.29559e-17	32.2274	Not-significant
RABL3	-0.681616	-10.4017	6.83363e-19	1.31637e-17	32.2107	Not-significant
HOXB4	0.818643	10.4013	6.84951e-19	1.31822e-17	32.2084	Not-significant
ARHGAP23	1.3905	10.4005	6.88143e-19	1.32314e-17	32.2038	Up-regulated
VAMP8	-1.37861	-10.3998	6.91085e-19	1.32757e-17	32.1995	Down-regulated
ANKRD9	-1.15593	-10.3963	7.04885e-19	1.35283e-17	32.1799	Down-regulated
PLK1	1.58171	10.3942	7.13679e-19	1.36845e-17	32.1676	Up-regulated
KRT3	-0.664917	-10.3935	7.16573e-19	1.37274e-17	32.1636	Not-significant
SLC35D2	-1.39444	-10.3925	7.20856e-19	1.37968e-17	32.1577	Down-regulated
CCDC71L	1.54598	10.3921	7.22151e-19	1.38089e-17	32.1559	Up-regulated
TRADD	-0.603865	-10.3899	7.31493e-19	1.39747e-17	32.1431	Not-significant
NUTM2B-AS1	-0.969542	-10.3866	7.45649e-19	1.42321e-17	32.1241	Down-regulated
MED11	-0.651487	-10.3841	7.56602e-19	1.4428e-17	32.1096	Not-significant
MPZL1	0.74219	10.3834	7.59731e-19	1.44744e-17	32.1055	Not-significant
ALOXE3	0.512222	10.3753	7.95772e-19	1.51473e-17	32.0595	Not-significant
RBMY3AP	0.546551	10.3728	8.07611e-19	1.53586e-17	32.0449	Not-significant
ZNF823	-1.39563	-10.3706	8.17938e-19	1.55408e-17	32.0322	Down-regulated
KAZALD1	-0.955886	-10.3694	8.23732e-19	1.56367e-17	32.0252	Down-regulated
MCM9	-0.960686	-10.3641	8.48948e-19	1.61007e-17	31.9953	Down-regulated
PANK3	-1.2193	-10.363	8.54451e-19	1.61771e-17	31.9889	Down-regulated
DARS1	-0.918632	-10.363	8.54525e-19	1.61771e-17	31.9888	Down-regulated
TUBB6	2.1261	10.3596	8.71393e-19	1.64814e-17	31.9694	Up-regulated
APOD	3.80479	10.3593	8.72781e-19	1.64927e-17	31.9678	Up-regulated
FBXO33	-1.00988	-10.3567	8.8633e-19	1.67336e-17	31.9525	Down-regulated
LOC101928263	0.496347	10.3545	8.97743e-19	1.69337e-17	31.9398	Not-significant
NDUFA2	-0.644112	-10.3526	9.07189e-19	1.70965e-17	31.9294	Not-significant
ASPRV1	-0.747719	-10.3501	9.20572e-19	1.7333e-17	31.9149	Not-significant
RFTN1	1.71226	10.3491	9.26073e-19	1.74209e-17	31.909	Up-regulated
PLEKHA6	-1.71423	-10.3482	9.30748e-19	1.7493e-17	31.904	Down-regulated
ZC3H3	0.872909	10.3445	9.5108e-19	1.78433e-17	31.8825	Not-significant
SLC14A1	-1.24084	-10.3445	9.51094e-19	1.78433e-17	31.8825	Down-regulated
SLC26A7	-2.2184	-10.3411	9.69957e-19	1.81808e-17	31.863	Down-regulated
XIAP	-1.06397	-10.3354	1.00214e-18	1.87671e-17	31.8306	Down-regulated
RPAIN	-0.577331	-10.3347	1.00619e-18	1.88262e-17	31.8266	Not-significant
DPYSL5	0.609011	10.3318	1.02318e-18	1.91269e-17	31.81	Not-significant
RIPK4	-2.02186	-10.3265	1.05527e-18	1.97091e-17	31.7794	Down-regulated
CNOT6	-1.00652	-10.3243	1.06819e-18	1.99326e-17	31.7673	Down-regulated
TTC13	-1.1805	-10.3221	1.08217e-18	2.01754e-17	31.7544	Down-regulated
PPT1	0.879995	10.3172	1.11349e-18	2.07407e-17	31.726	Not-significant
APTR	-1.43035	-10.3133	1.13848e-18	2.11873e-17	31.704	Down-regulated
RBM14	-0.780755	-10.3111	1.15284e-18	2.14354e-17	31.6916	Not-significant
FOXC1	1.13688	10.3073	1.17871e-18	2.18969e-17	31.6695	Up-regulated
SPINK2	-1.77622	-10.3068	1.18233e-18	2.19446e-17	31.6665	Down-regulated
ERF	0.90584	10.3031	1.20737e-18	2.23895e-17	31.6457	Up-regulated
TSKU-AS1	-0.818765	-10.3026	1.21136e-18	2.24435e-17	31.6424	Not-significant
KIF3C	0.935684	10.3015	1.21912e-18	2.25672e-17	31.6361	Up-regulated
ADAMTS10	0.819247	10.3007	1.22428e-18	2.26427e-17	31.6319	Not-significant
SIMC1	-1.04919	-10.2943	1.27033e-18	2.34736e-17	31.5952	Down-regulated
GDF11	0.663801	10.2882	1.31615e-18	2.42987e-17	31.5601	Not-significant
TMEM258	-0.661556	-10.2855	1.33657e-18	2.46538e-17	31.5448	Not-significant
SERPINF1	2.32371	10.2838	1.34984e-18	2.48767e-17	31.535	Up-regulated
LMNTD2-AS1	0.593305	10.2831	1.35528e-18	2.49535e-17	31.531	Not-significant
BARX2	-0.752577	-10.283	1.3564e-18	2.49535e-17	31.5302	Not-significant
TEAD4	0.985581	10.2795	1.38355e-18	2.54305e-17	31.5105	Up-regulated
ATP6V0A2	-0.957764	-10.2791	1.38679e-18	2.54485e-17	31.5082	Down-regulated
TSPO	-1.28489	-10.2791	1.38697e-18	2.54485e-17	31.5081	Down-regulated
CDKL5	-1.60094	-10.2756	1.41563e-18	2.59515e-17	31.4878	Down-regulated
SNRNP35	-0.57492	-10.2716	1.44858e-18	2.65322e-17	31.4649	Not-significant
RSPO3	3.18716	10.2682	1.47699e-18	2.70289e-17	31.4456	Up-regulated
KIF1C	-0.800729	-10.2647	1.50734e-18	2.75601e-17	31.4255	Not-significant
SLC35B3	-1.13959	-10.2614	1.53594e-18	2.80585e-17	31.4068	Down-regulated
PLEKHG2	0.479936	10.2604	1.5447e-18	2.81938e-17	31.4012	Not-significant
CAP2	2.74744	10.2599	1.54985e-18	2.8263e-17	31.3978	Up-regulated
SMPDL3A	-2.03477	-10.2596	1.55179e-18	2.82737e-17	31.3966	Down-regulated
GPATCH1	-0.908147	-10.257	1.57538e-18	2.86785e-17	31.3816	Down-regulated
PPP1R18	1.50519	10.2525	1.61689e-18	2.94085e-17	31.3558	Up-regulated
BTBD19	1.58769	10.2477	1.66298e-18	3.02204e-17	31.3279	Up-regulated
TCF7L2	-0.976727	-10.2401	1.73735e-18	3.15444e-17	31.2845	Down-regulated
SEC22C	-0.739199	-10.2378	1.76033e-18	3.19245e-17	31.2715	Not-significant
SFRP4	4.25212	10.2377	1.76134e-18	3.19245e-17	31.2709	Up-regulated
KMT2C	-0.926404	-10.2375	1.76289e-18	3.19249e-17	31.27	Down-regulated
CLOCK	-1.0868	-10.2341	1.79825e-18	3.2537e-17	31.2503	Down-regulated
FYN	1.28147	10.2315	1.8249e-18	3.29906e-17	31.2357	Up-regulated
PIP5K1C	1.35208	10.2285	1.85765e-18	3.35257e-17	31.218	Up-regulated
USP53	-1.27047	-10.2285	1.85772e-18	3.35257e-17	31.218	Down-regulated
ARNTL	-0.955805	-10.228	1.86306e-18	3.35931e-17	31.2152	Down-regulated
AIF1	1.21757	10.2257	1.88799e-18	3.40131e-17	31.202	Up-regulated
ADAMTS6	1.4562	10.2205	1.94496e-18	3.50093e-17	31.1725	Up-regulated
RAB31	1.81395	10.21	2.06605e-18	3.71569e-17	31.1125	Up-regulated
DCTN4	-0.717069	-10.2089	2.07908e-18	3.73591e-17	31.1063	Not-significant
ELMOD2	-0.690609	-10.2038	2.14212e-18	3.84587e-17	31.0766	Not-significant
PSD3	-1.36978	-10.2035	2.14507e-18	3.84784e-17	31.0753	Down-regulated
PDIK1L	-1.22134	-10.2027	2.15579e-18	3.86376e-17	31.0703	Down-regulated
PIWIL2	-1.85295	-10.1941	2.26543e-18	4.05678e-17	31.0211	Down-regulated
GSR	-1.09563	-10.1931	2.27854e-18	4.07675e-17	31.0154	Down-regulated
DGCR2	-0.72852	-10.1869	2.36086e-18	4.22042e-17	30.9801	Not-significant
ADAMTSL4	1.84881	10.18	2.45625e-18	4.38718e-17	30.9408	Up-regulated
DCTN1-AS1	-0.425242	-10.1737	2.54741e-18	4.54612e-17	30.9047	Not-significant
AK5	-1.05489	-10.1686	2.62391e-18	4.67864e-17	30.8753	Down-regulated
SPIN3	-1.10359	-10.1671	2.64613e-18	4.71423e-17	30.8669	Down-regulated
EIF3J-DT	-0.836618	-10.1667	2.65198e-18	4.72062e-17	30.8647	Not-significant
GRIPAP1	-0.665521	-10.1575	2.79698e-18	4.97447e-17	30.8119	Not-significant
BMP4	-1.36526	-10.1509	2.90559e-18	5.16324e-17	30.7741	Down-regulated
NAB2	0.959696	10.15	2.9204e-18	5.18514e-17	30.7691	Up-regulated
FBXL4	-0.999339	-10.1466	2.97836e-18	5.28354e-17	30.7496	Down-regulated
PARVG	1.1298	10.146	2.98936e-18	5.29856e-17	30.7459	Up-regulated
MAP4K3	-1.11674	-10.1433	3.03595e-18	5.37658e-17	30.7305	Down-regulated
AXDND1	-3.12373	-10.1423	3.05294e-18	5.40207e-17	30.725	Down-regulated
LINC00643	-0.711066	-10.1421	3.05723e-18	5.40508e-17	30.7236	Not-significant
NBPF3	-0.950384	-10.1396	3.10041e-18	5.47678e-17	30.7097	Down-regulated
FNIP2	-1.06072	-10.1335	3.21164e-18	5.66846e-17	30.6747	Down-regulated
SECISBP2L	-1.08248	-10.1294	3.28856e-18	5.79931e-17	30.6512	Down-regulated
PLXNA2	-1.16722	-10.127	3.33411e-18	5.87467e-17	30.6376	Down-regulated
LPAR2	-1.19345	-10.1262	3.34924e-18	5.89635e-17	30.6331	Down-regulated
LASP1	-0.948288	-10.1245	3.38312e-18	5.95098e-17	30.6231	Down-regulated
ARPC1A	-1.05975	-10.1227	3.41833e-18	6.00786e-17	30.6128	Down-regulated
ARSJ	-1.31934	-10.1219	3.43382e-18	6.02429e-17	30.6083	Down-regulated
MED8	-0.698645	-10.1218	3.4352e-18	6.02429e-17	30.6079	Not-significant
ACTN4	0.844092	10.1218	3.43634e-18	6.02429e-17	30.6076	Not-significant
LINC01133	-3.79672	-10.1201	3.46967e-18	6.07761e-17	30.598	Down-regulated
TMEM158	1.89727	10.1171	3.53097e-18	6.17978e-17	30.5807	Up-regulated
CFC1B	-0.52809	-10.116	3.55337e-18	6.21377e-17	30.5744	Not-significant
KLHDC10	-0.70927	-10.1135	3.60371e-18	6.29653e-17	30.5604	Not-significant
MYL12A	-0.690136	-10.112	3.63544e-18	6.34666e-17	30.5517	Not-significant
CTNNB1	-1.08214	-10.111	3.65678e-18	6.37858e-17	30.5459	Down-regulated
KIAA1522	-1.4823	-10.108	3.72031e-18	6.48398e-17	30.5288	Down-regulated
PACSIN2	-0.683701	-10.1056	3.7727e-18	6.5698e-17	30.5149	Not-significant
GAS2	-1.95113	-10.1037	3.81287e-18	6.63421e-17	30.5044	Down-regulated
C11orf96	2.15469	10.1032	3.82447e-18	6.64883e-17	30.5014	Up-regulated
RCN3	1.49579	10.0999	3.89735e-18	6.7699e-17	30.4827	Up-regulated
AP1G1	-0.837627	-10.0995	3.90696e-18	6.78096e-17	30.4802	Not-significant
MAP7D2	-3.51948	-10.0989	3.91958e-18	6.7972e-17	30.477	Down-regulated
HERC4	-1.03816	-10.0972	3.9581e-18	6.8583e-17	30.4673	Down-regulated
PIGS	-0.69534	-10.0958	3.99047e-18	6.90865e-17	30.4593	Not-significant
CARD6	-1.25579	-10.091	4.10293e-18	7.09746e-17	30.4317	Down-regulated
SCG3	-2.05936	-10.0899	4.12772e-18	7.13442e-17	30.4257	Down-regulated
DDX31	0.532721	10.0815	4.33365e-18	7.48415e-17	30.3774	Not-significant
PXN-AS1	-0.898211	-10.0809	4.34842e-18	7.50182e-17	30.374	Not-significant
GNPTAB	-1.03688	-10.0808	4.35107e-18	7.50182e-17	30.3734	Down-regulated
GPI	0.91336	10.0801	4.36847e-18	7.52415e-17	30.3694	Up-regulated
ATAD2B	-0.981855	-10.08	4.37123e-18	7.52415e-17	30.3688	Down-regulated
PPP2R1B	-1.0928	-10.0781	4.41857e-18	7.59935e-17	30.3581	Down-regulated
ADAMTS2	2.49251	10.0772	4.44174e-18	7.63291e-17	30.3529	Up-regulated
DEFB118	0.683919	10.0762	4.46671e-18	7.6695e-17	30.3474	Not-significant
DNM1	1.71463	10.0737	4.53156e-18	7.77446e-17	30.3331	Up-regulated
PREX1	1.25875	10.0689	4.65952e-18	7.98742e-17	30.3054	Up-regulated
HROB	0.640176	10.0681	4.6817e-18	8.01885e-17	30.3007	Not-significant
SLC2A13	-1.54576	-10.0621	4.84657e-18	8.29444e-17	30.2664	Down-regulated
PTP4A3	1.76773	10.0606	4.88744e-18	8.35753e-17	30.2581	Up-regulated
SIRT7	-1.08866	-10.0579	4.96494e-18	8.4767e-17	30.2424	Down-regulated
CA5B	0.639302	10.0579	4.96526e-18	8.4767e-17	30.2424	Not-significant
GABARAPL2	-0.731217	-10.0552	5.0431e-18	8.60254e-17	30.2269	Not-significant
DOK5	2.10211	10.0536	5.08755e-18	8.67128e-17	30.2182	Up-regulated
DDX60L	-1.77836	-10.0508	5.17171e-18	8.80754e-17	30.202	Down-regulated
IGSF3	-1.46685	-10.0469	5.28978e-18	9.00125e-17	30.1796	Down-regulated
FNDC4	0.78726	10.0466	5.29702e-18	9.00623e-17	30.1782	Not-significant
MTMR10	-0.838706	-10.0419	5.44329e-18	9.24739e-17	30.1512	Not-significant
FADS2	0.791457	10.0388	5.54131e-18	9.40625e-17	30.1335	Not-significant
CCDC153	-0.732115	-10.0386	5.54637e-18	9.40718e-17	30.1326	Not-significant
MYCN	-2.00514	-10.0382	5.56083e-18	9.42405e-17	30.13	Down-regulated
DCUN1D2	-0.671869	-10.0346	5.67729e-18	9.61361e-17	30.1094	Not-significant
PLAC4	0.692229	10.0338	5.70431e-18	9.65152e-17	30.1047	Not-significant
TTC17	-0.733342	-10.0312	5.78779e-18	9.78484e-17	30.0903	Not-significant
RAP2B	-1.02678	-10.0296	5.84141e-18	9.86748e-17	30.0811	Down-regulated
CCDC88C	-1.06883	-10.0263	5.9556e-18	1.00522e-16	30.0619	Down-regulated
ULK3	-0.757245	-10.0209	6.14406e-18	1.0362e-16	30.031	Not-significant
C19orf25	-0.816485	-10.0181	6.24277e-18	1.05199e-16	30.0152	Not-significant
CEPT1	-0.910697	-10.0152	6.3478e-18	1.06883e-16	29.9986	Down-regulated
CILK1	-0.952696	-10.0133	6.41753e-18	1.0797e-16	29.9878	Down-regulated
LYPD6B	-3.06687	-10.01	6.54074e-18	1.09954e-16	29.9689	Down-regulated
NUDT16L1	-0.704311	-10.0096	6.55493e-18	1.10104e-16	29.9668	Not-significant
LTBP2	1.77813	10.0089	6.58109e-18	1.10454e-16	29.9628	Up-regulated
MACC1-DT	-2.11834	-10.005	6.73241e-18	1.12903e-16	29.9403	Down-regulated
HCG11	-1.22243	-10.0024	6.83213e-18	1.14483e-16	29.9257	Down-regulated
DUSP8	0.745476	9.99999	6.92838e-18	1.16003e-16	29.9118	Not-significant
SCFD1	-0.86482	-9.99837	6.99332e-18	1.16996e-16	29.9026	Not-significant
CA5BP1	0.633089	9.99637	7.07422e-18	1.18255e-16	29.8911	Not-significant
MLLT3	-1.09671	-9.99329	7.20073e-18	1.20274e-16	29.8736	Down-regulated
CRIM1	1.17901	9.99187	7.25961e-18	1.2116e-16	29.8655	Up-regulated
SPHK1	1.54514	9.98686	7.47183e-18	1.24602e-16	29.8369	Up-regulated
ZNF331	1.80264	9.98655	7.48512e-18	1.24724e-16	29.8351	Up-regulated
ZNF268	-1.15293	-9.98375	7.60666e-18	1.26648e-16	29.8191	Down-regulated
TNFAIP6	2.36885	9.98206	7.68121e-18	1.27787e-16	29.8095	Up-regulated
CENPBD1P	-0.582541	-9.97677	7.91837e-18	1.31628e-16	29.7793	Not-significant
MGAT5	-0.941921	-9.97638	7.93625e-18	1.31726e-16	29.7771	Down-regulated
LBX2-AS1	0.968445	9.97636	7.93692e-18	1.31726e-16	29.777	Up-regulated
FRK	-2.27916	-9.97599	7.95389e-18	1.31903e-16	29.7749	Down-regulated
ETV6	-0.788463	-9.97539	7.98132e-18	1.32253e-16	29.7714	Not-significant
PAN2	-0.716396	-9.97423	8.03501e-18	1.33037e-16	29.7648	Not-significant
CCDC12	-0.700611	-9.97168	8.15373e-18	1.34895e-16	29.7502	Not-significant
LINC00685	-0.861491	-9.97088	8.19118e-18	1.35408e-16	29.7457	Not-significant
SLC9A1	-1.53965	-9.96812	8.3223e-18	1.37466e-16	29.7299	Down-regulated
DISP2	-1.29034	-9.96457	8.49385e-18	1.40189e-16	29.7097	Down-regulated
SLC35A1	-1.16171	-9.9625	8.59576e-18	1.41759e-16	29.6979	Down-regulated
NADSYN1	-0.950076	-9.9623	8.60553e-18	1.41808e-16	29.6967	Down-regulated
EDEM1	-0.968096	-9.95892	8.77465e-18	1.44481e-16	29.6774	Down-regulated
RNF41	0.633377	9.95821	8.8106e-18	1.44958e-16	29.6734	Not-significant
CHUK	-1.13972	-9.95728	8.85785e-18	1.45608e-16	29.6681	Down-regulated
DNAJC25	-0.806382	-9.95716	8.86406e-18	1.45608e-16	29.6674	Not-significant
EXOC3L4	-1.01057	-9.95495	8.97724e-18	1.47307e-16	29.6548	Down-regulated
CNTN3	-2.06538	-9.95487	8.9816e-18	1.47307e-16	29.6543	Down-regulated
YIPF4	-0.8365	-9.95322	9.06711e-18	1.48592e-16	29.6449	Not-significant
KLHL3	-1.18953	-9.95276	9.09102e-18	1.48867e-16	29.6423	Down-regulated
APOL4	1.10314	9.94917	9.28076e-18	1.51855e-16	29.6218	Up-regulated
GPD2	-1.53209	-9.94737	9.37725e-18	1.53314e-16	29.6115	Down-regulated
GAL3ST2	0.46957	9.94541	9.48354e-18	1.5493e-16	29.6003	Not-significant
FLNB	-1.11293	-9.94484	9.51468e-18	1.55317e-16	29.5971	Down-regulated
LRRC8C-DT	0.571843	9.9439	9.56593e-18	1.56032e-16	29.5918	Not-significant
UBE3A	-0.729649	-9.94137	9.70624e-18	1.58181e-16	29.5773	Not-significant
DNMBP	-1.20298	-9.94125	9.71289e-18	1.58181e-16	29.5766	Down-regulated
MGP	3.20004	9.94048	9.75589e-18	1.58758e-16	29.5723	Up-regulated
RAB14	-0.737676	-9.9396	9.80554e-18	1.59441e-16	29.5672	Not-significant
ITGBL1	3.44478	9.93871	9.85581e-18	1.60134e-16	29.5621	Up-regulated
AKR7A2	-0.909094	-9.93758	9.92032e-18	1.61057e-16	29.5557	Down-regulated
LAMTOR5	-0.657781	-9.93492	1.00732e-17	1.63412e-16	29.5405	Not-significant
IL18BP	1.71871	9.93477	1.00816e-17	1.63421e-16	29.5397	Up-regulated
R3HCC1L	-0.749506	-9.9342	1.0115e-17	1.63834e-16	29.5364	Not-significant
EEF1AKMT2	-1.03494	-9.93236	1.02223e-17	1.65444e-16	29.5259	Down-regulated
RNASE1	-2.1533	-9.93145	1.02763e-17	1.66189e-16	29.5207	Down-regulated
EEF2K	-0.766543	-9.9293	1.04038e-17	1.68121e-16	29.5085	Not-significant
TMEM219	-0.704849	-9.9285	1.04518e-17	1.68766e-16	29.5039	Not-significant
TMEM33	-1.07951	-9.92745	1.0515e-17	1.69654e-16	29.4979	Down-regulated
MAN2B2	-0.857169	-9.92569	1.06222e-17	1.71253e-16	29.4878	Not-significant
EFCAB14	-0.851386	-9.92406	1.07222e-17	1.7273e-16	29.4786	Not-significant
VAT1	1.02759	9.92305	1.07842e-17	1.73596e-16	29.4728	Up-regulated
COPE	0.906729	9.92232	1.08294e-17	1.74096e-16	29.4687	Up-regulated
NRSN2	1.02906	9.92228	1.0832e-17	1.74096e-16	29.4684	Up-regulated
THBS1	2.47981	9.91949	1.10075e-17	1.76781e-16	29.4525	Up-regulated
SMCO4	-1.17265	-9.91209	1.14858e-17	1.8432e-16	29.4103	Down-regulated
COX6A1	-0.718429	-9.89221	1.28754e-17	2.06461e-16	29.297	Not-significant
C15orf40	-0.957972	-9.89122	1.29494e-17	2.07489e-16	29.2913	Down-regulated
ITGB2	1.83493	9.88867	1.31406e-17	2.10392e-16	29.2768	Up-regulated
RASSF10	-2.12742	-9.88683	1.32799e-17	2.12458e-16	29.2663	Down-regulated
SH2B2	0.858966	9.87975	1.3831e-17	2.21047e-16	29.226	Not-significant
MEDAG	2.24606	9.87967	1.3838e-17	2.21047e-16	29.2255	Up-regulated
C1QTNF1	1.16898	9.87936	1.38619e-17	2.2126e-16	29.2238	Up-regulated
SOGA1	1.37821	9.87798	1.3973e-17	2.2283e-16	29.2158	Up-regulated
CDH11	2.32001	9.87787	1.39816e-17	2.2283e-16	29.2152	Up-regulated
SLC44A1	-1.32984	-9.87144	1.45079e-17	2.31042e-16	29.1786	Down-regulated
MRAS	1.42881	9.8704	1.45942e-17	2.32238e-16	29.1727	Up-regulated
TMEM222	0.512592	9.86908	1.47057e-17	2.33834e-16	29.1651	Not-significant
ZNF398	-0.714013	-9.86787	1.48078e-17	2.35278e-16	29.1583	Not-significant
ZNF44	-0.811614	-9.86458	1.5091e-17	2.39596e-16	29.1395	Not-significant
MAP1LC3A	1.11964	9.86375	1.51627e-17	2.4055e-16	29.1348	Up-regulated
COL3A1	1.41186	9.86238	1.52829e-17	2.42273e-16	29.127	Up-regulated
LPIN2	-1.35381	-9.86195	1.532e-17	2.42677e-16	29.1245	Down-regulated
SWT1	-0.679689	-9.85908	1.55753e-17	2.46534e-16	29.1082	Not-significant
TBC1D24	-0.934208	-9.85871	1.56081e-17	2.46866e-16	29.1061	Down-regulated
PRKAA1	-0.992441	-9.85682	1.57782e-17	2.49367e-16	29.0953	Down-regulated
CCDC8	1.01592	9.85454	1.59863e-17	2.52465e-16	29.0823	Up-regulated
BLVRA	1.21974	9.85326	1.61041e-17	2.53799e-16	29.075	Up-regulated
LINC01843	-1.04367	-9.85325	1.61053e-17	2.53799e-16	29.075	Down-regulated
NHLRC3	-0.965335	-9.85323	1.61072e-17	2.53799e-16	29.0748	Down-regulated
SESTD1	1.14856	9.85003	1.64055e-17	2.58302e-16	29.0566	Up-regulated
FHL3	0.921188	9.84733	1.66622e-17	2.62147e-16	29.0412	Up-regulated
FZD5	-1.78908	-9.84463	1.69222e-17	2.66037e-16	29.0259	Down-regulated
MIB1	-1.0409	-9.84302	1.70793e-17	2.68304e-16	29.0167	Down-regulated
GALNT6	-2.72599	-9.84172	1.72074e-17	2.70114e-16	29.0093	Down-regulated
ADORA1	-0.575367	-9.84125	1.72542e-17	2.7061e-16	29.0066	Not-significant
LAMTOR4	-0.820353	-9.84114	1.7265e-17	2.7061e-16	29.006	Not-significant
MORN2	-0.931599	-9.83889	1.74895e-17	2.73923e-16	28.9932	Down-regulated
TMEM95	0.629978	9.83852	1.75265e-17	2.74296e-16	28.9911	Not-significant
FAHD2A	-0.780996	-9.83416	1.79709e-17	2.81042e-16	28.9662	Not-significant
L3MBTL4	-0.997274	-9.83343	1.80465e-17	2.82012e-16	28.9621	Down-regulated
TRMT10B	-0.670969	-9.83163	1.82339e-17	2.84728e-16	28.9518	Not-significant
ELN	2.30976	9.83008	1.8397e-17	2.87059e-16	28.943	Up-regulated
TENT5C	-2.18745	-9.82388	1.90642e-17	2.97247e-16	28.9077	Down-regulated
CRB3	-1.0607	-9.82374	1.90794e-17	2.97262e-16	28.9069	Down-regulated
MYL12B	-0.745791	-9.82329	1.91289e-17	2.97811e-16	28.9043	Not-significant
STEEP1	-0.6411	-9.82227	1.9241e-17	2.99333e-16	28.8985	Not-significant
SZRD1	0.532991	9.82111	1.93691e-17	3.01101e-16	28.8919	Not-significant
SMIM2-AS1	-1.1686	-9.8209	1.93925e-17	3.01241e-16	28.8907	Down-regulated
ZNF580	1.23267	9.8181	1.97072e-17	3.05901e-16	28.8747	Up-regulated
LNPK	-0.800024	-9.81682	1.98525e-17	3.07927e-16	28.8675	Not-significant
PIAS1	-0.866162	-9.81313	2.02777e-17	3.14289e-16	28.8464	Not-significant
SPATA6L	-0.901675	-9.81275	2.03219e-17	3.1474e-16	28.8443	Down-regulated
ZSCAN16	-1.11721	-9.80854	2.0819e-17	3.222e-16	28.8203	Down-regulated
B4GALT1	-1.42868	-9.80623	2.10959e-17	3.26243e-16	28.8072	Down-regulated
TST	-2.04238	-9.80606	2.11169e-17	3.26326e-16	28.8062	Down-regulated
TYROBP	1.52105	9.80512	2.12315e-17	3.27854e-16	28.8008	Up-regulated
ACVR1C	-1.86546	-9.80283	2.15125e-17	3.31949e-16	28.7878	Down-regulated
INO80E	0.681317	9.80261	2.15388e-17	3.32108e-16	28.7866	Not-significant
KRAS	1.46749	9.79972	2.18987e-17	3.37408e-16	28.7702	Up-regulated
NCBP3	-0.708051	-9.79871	2.20263e-17	3.39124e-16	28.7644	Not-significant
KDM5C	0.753089	9.79841	2.2064e-17	3.39453e-16	28.7627	Not-significant
ITPRID2	-1.03454	-9.79312	2.27442e-17	3.49661e-16	28.7326	Down-regulated
SLC1A3	1.75636	9.79117	2.30006e-17	3.53343e-16	28.7215	Up-regulated
DHRS4-AS1	-1.1121	-9.78972	2.31926e-17	3.56029e-16	28.7132	Down-regulated
TGFBI	1.59145	9.7887	2.33285e-17	3.57853e-16	28.7074	Up-regulated
TRIM52	-1.02811	-9.78709	2.35449e-17	3.60907e-16	28.6983	Down-regulated
NAPG	-0.979969	-9.78533	2.37839e-17	3.64303e-16	28.6882	Down-regulated
AGBL1	-0.596818	-9.78325	2.40698e-17	3.68411e-16	28.6764	Not-significant
ZNF81	-0.720407	-9.78308	2.40939e-17	3.6851e-16	28.6754	Not-significant
ZNF252P-AS1	-0.782371	-9.78289	2.4119e-17	3.68623e-16	28.6744	Not-significant
CHM	-0.94863	-9.78239	2.41895e-17	3.6943e-16	28.6715	Down-regulated
EDN3	-2.98374	-9.78204	2.4238e-17	3.699e-16	28.6695	Down-regulated
RAB11B-AS1	-1.03603	-9.77813	2.47868e-17	3.77998e-16	28.6473	Down-regulated
SLIRP	-0.849984	-9.77719	2.49215e-17	3.79776e-16	28.6419	Not-significant
RAB3D	-1.26635	-9.77596	2.50983e-17	3.82191e-16	28.6349	Down-regulated
FLG2	-0.509652	-9.77457	2.52987e-17	3.84962e-16	28.627	Not-significant
CCPG1	-0.830238	-9.77053	2.58916e-17	3.93695e-16	28.604	Not-significant
SIPA1L1	-0.581194	-9.77003	2.59658e-17	3.94536e-16	28.6012	Not-significant
TLE4	-1.39228	-9.76952	2.60422e-17	3.9541e-16	28.5983	Down-regulated
FAM86C1P	0.831217	9.76737	2.63662e-17	4.00037e-16	28.586	Not-significant
PRSS12	-2.33518	-9.7669	2.64373e-17	4.00825e-16	28.5833	Down-regulated
ENTPD3	-2.18809	-9.7662	2.65438e-17	4.02148e-16	28.5793	Down-regulated
MICOS10	-0.650192	-9.76522	2.66924e-17	4.04105e-16	28.5738	Not-significant
ACYP1	-1.05702	-9.76495	2.67341e-17	4.04442e-16	28.5723	Down-regulated
DACH2	-0.439241	-9.76044	2.74342e-17	4.14733e-16	28.5466	Not-significant
RBM47	-2.18989	-9.75504	2.82984e-17	4.27489e-16	28.5159	Down-regulated
KIAA0513	-1.14478	-9.75088	2.89804e-17	4.37473e-16	28.4922	Down-regulated
ARHGAP12	-1.27246	-9.74558	2.98751e-17	4.50654e-16	28.4621	Down-regulated
C1S	1.91124	9.74433	3.00895e-17	4.5356e-16	28.455	Up-regulated
ZDHHC20	-1.21144	-9.74012	3.08256e-17	4.64321e-16	28.431	Down-regulated
GGT6	-2.27141	-9.73563	3.16294e-17	4.76084e-16	28.4055	Down-regulated
CD2AP	-1.7565	-9.73492	3.17589e-17	4.77689e-16	28.4014	Down-regulated
FA2H	-3.06737	-9.73443	3.18482e-17	4.78686e-16	28.3987	Down-regulated
ARHGAP26	-1.34876	-9.73375	3.19714e-17	4.80193e-16	28.3948	Down-regulated
SH3GL1	0.5988	9.73214	3.22691e-17	4.84315e-16	28.3856	Not-significant
SRGN	1.24055	9.73199	3.22955e-17	4.84362e-16	28.3848	Up-regulated
UNC50	-0.583728	-9.73052	3.25696e-17	4.88123e-16	28.3764	Not-significant
TUBB	0.826172	9.72959	3.27429e-17	4.90368e-16	28.3712	Not-significant
DEFB1	-2.94422	-9.72769	3.31027e-17	4.954e-16	28.3603	Down-regulated
HIGD1A	-0.995781	-9.72685	3.32626e-17	4.97437e-16	28.3556	Down-regulated
C1orf56	0.90174	9.72634	3.3359e-17	4.9852e-16	28.3527	Up-regulated
CAPNS1	0.704283	9.72583	3.34575e-17	4.99636e-16	28.3498	Not-significant
SLC39A14	-1.37929	-9.7256	3.35006e-17	4.99922e-16	28.3485	Down-regulated
NR2F6	-1.2774	-9.7184	3.49117e-17	5.20606e-16	28.3076	Down-regulated
PTMS	1.42877	9.71817	3.49578e-17	5.20921e-16	28.3063	Up-regulated
FLOT1	0.853342	9.71496	3.56083e-17	5.30235e-16	28.288	Not-significant
GABPA	-0.947302	-9.71105	3.64154e-17	5.41868e-16	28.2657	Down-regulated
TDRG1	0.698934	9.70695	3.72814e-17	5.54358e-16	28.2424	Not-significant
HPGD	-3.52868	-9.70586	3.75145e-17	5.57428e-16	28.2362	Down-regulated
DUSP28	-0.813059	-9.70559	3.7573e-17	5.57899e-16	28.2347	Not-significant
SHANK3	2.06626	9.70395	3.7928e-17	5.6277e-16	28.2254	Up-regulated
ARID5A	0.852311	9.70307	3.81179e-17	5.65186e-16	28.2204	Not-significant
SEC11C	-1.26673	-9.7007	3.86408e-17	5.72532e-16	28.2069	Down-regulated
CAMK1	1.17519	9.69976	3.88485e-17	5.752e-16	28.2016	Up-regulated
SH3RF1	-1.6268	-9.69951	3.89052e-17	5.75632e-16	28.2002	Down-regulated
PIGB	-0.82214	-9.69903	3.90127e-17	5.76813e-16	28.1974	Not-significant
LGR4	-1.86147	-9.6976	3.93331e-17	5.81137e-16	28.1893	Down-regulated
ARX	-2.48512	-9.69499	3.99263e-17	5.89485e-16	28.1745	Down-regulated
PLGRKT	-1.3403	-9.69431	4.00805e-17	5.91343e-16	28.1706	Down-regulated
PLEKHO2	0.950449	9.69186	4.06486e-17	5.99301e-16	28.1567	Up-regulated
TMEM41B	-1.03661	-9.69149	4.07336e-17	6.0013e-16	28.1546	Down-regulated
GPR4	0.70168	9.6884	4.14624e-17	6.10437e-16	28.137	Not-significant
PRR16	1.02607	9.68823	4.15023e-17	6.10593e-16	28.1361	Up-regulated
PPM1A	-0.655063	-9.6864	4.19395e-17	6.16591e-16	28.1257	Not-significant
BEND7	-1.47469	-9.68538	4.21859e-17	6.19776e-16	28.1199	Down-regulated
SPAG16	-2.03482	-9.68413	4.24891e-17	6.23791e-16	28.1128	Down-regulated
CTSB	1.08185	9.68352	4.26375e-17	6.2553e-16	28.1093	Up-regulated
MGAT4B	-1.23681	-9.68305	4.27516e-17	6.26763e-16	28.1067	Down-regulated
ARFIP2	0.905555	9.68041	4.34032e-17	6.3587e-16	28.0916	Up-regulated
CHDH	-1.06237	-9.67995	4.35177e-17	6.37099e-16	28.089	Down-regulated
CDK4	0.872956	9.67728	4.41874e-17	6.4645e-16	28.0739	Not-significant
PBLD	-2.95078	-9.67643	4.44048e-17	6.49176e-16	28.069	Down-regulated
OPA3	-0.495127	-9.67521	4.47147e-17	6.53248e-16	28.0621	Not-significant
ASAP1-IT1	0.980404	9.67486	4.48046e-17	6.54103e-16	28.0601	Up-regulated
CHI3L1	4.41299	9.67073	4.5879e-17	6.69321e-16	28.0366	Up-regulated
MIX23	-1.61072	-9.66702	4.68624e-17	6.83188e-16	28.0156	Down-regulated
KCNJ8	2.0255	9.6652	4.73548e-17	6.89886e-16	28.0052	Up-regulated
LNX2	-1.11097	-9.66347	4.7827e-17	6.96278e-16	27.9954	Down-regulated
ILRUN-AS1	-0.890352	-9.65991	4.88111e-17	7.10109e-16	27.9752	Not-significant
WDR17	-0.892941	-9.65803	4.93392e-17	7.17293e-16	27.9645	Not-significant
ZNF700	-1.0959	-9.6578	4.94053e-17	7.17753e-16	27.9632	Down-regulated
RAMP2	1.56328	9.65719	4.95778e-17	7.19612e-16	27.9597	Up-regulated
DDX11L2	0.678403	9.6571	4.96023e-17	7.19612e-16	27.9593	Not-significant
LOC102724929	0.532225	9.65653	4.97653e-17	7.21476e-16	27.956	Not-significant
TBC1D25	0.777765	9.65636	4.98143e-17	7.21685e-16	27.955	Not-significant
MOSPD3	0.740219	9.65583	4.99651e-17	7.23367e-16	27.952	Not-significant
TWIST1	2.25327	9.65492	5.0227e-17	7.26654e-16	27.9468	Up-regulated
ADAM15	0.813164	9.65439	5.0379e-17	7.28349e-16	27.9438	Not-significant
UGGT1	-0.72606	-9.6522	5.1015e-17	7.37032e-16	27.9314	Not-significant
C3orf52	-2.01947	-9.6515	5.12181e-17	7.39454e-16	27.9275	Down-regulated
POGLUT1	-0.685813	-9.64972	5.17429e-17	7.46515e-16	27.9174	Not-significant
PILRA	1.31735	9.64825	5.21802e-17	7.52303e-16	27.909	Up-regulated
OARD1	-1.10519	-9.64697	5.25643e-17	7.57318e-16	27.9017	Down-regulated
GTF2IRD2	-0.839372	-9.64603	5.28491e-17	7.60828e-16	27.8964	Not-significant
TEDC1	-0.69075	-9.64592	5.28809e-17	7.60828e-16	27.8958	Not-significant
PLAGL1	1.929	9.64161	5.42015e-17	7.79291e-16	27.8713	Up-regulated
FXYD5	1.30677	9.64039	5.45816e-17	7.84215e-16	27.8644	Up-regulated
GSTP1	-1.13466	-9.63951	5.48576e-17	7.87638e-16	27.8594	Down-regulated
ARFIP1	-0.90777	-9.63582	5.60292e-17	8.03907e-16	27.8384	Down-regulated
IPO13	0.726797	9.63406	5.65978e-17	8.11508e-16	27.8284	Not-significant
STX12	-0.895967	-9.63055	5.77466e-17	8.2741e-16	27.8085	Not-significant
FGR	1.28361	9.63016	5.78743e-17	8.2867e-16	27.8063	Up-regulated
SOX2	-2.67033	-9.6253	5.95076e-17	8.51473e-16	27.7787	Down-regulated
TAPT1-AS1	-1.26358	-9.62454	5.97654e-17	8.54576e-16	27.7744	Down-regulated
PIR	-1.58464	-9.62258	6.044e-17	8.6363e-16	27.7633	Down-regulated
CD300LB	0.466637	9.62105	6.09736e-17	8.70657e-16	27.7546	Not-significant
ST3GAL4	0.882081	9.62078	6.10652e-17	8.71369e-16	27.7531	Not-significant
ABHD8	0.653238	9.62029	6.12393e-17	8.73256e-16	27.7503	Not-significant
ZNF271P	-1.11376	-9.618	6.20471e-17	8.84171e-16	27.7373	Down-regulated
TBC1D32	-1.3848	-9.6176	6.21871e-17	8.85562e-16	27.735	Down-regulated
ZNF793-AS1	-1.0917	-9.61495	6.3138e-17	8.98489e-16	27.72	Down-regulated
MPZL3	-1.39623	-9.61434	6.33609e-17	9.01046e-16	27.7165	Down-regulated
ADAMTS12	2.18807	9.61069	6.46973e-17	9.19424e-16	27.6958	Up-regulated
XK	-2.53828	-9.6103	6.48394e-17	9.20816e-16	27.6936	Down-regulated
TMEM9B	-0.938093	-9.60906	6.53023e-17	9.2676e-16	27.6866	Down-regulated
SLC28A2	-4.55189	-9.60541	6.66807e-17	9.45679e-16	27.6658	Down-regulated
ZBTB8OS	-0.902287	-9.60188	6.80401e-17	9.64303e-16	27.6458	Down-regulated
AKR1C2	-2.51686	-9.60015	6.87165e-17	9.73227e-16	27.636	Down-regulated
BCLAF3	-0.798929	-9.59786	6.96249e-17	9.85424e-16	27.623	Not-significant
TBC1D22A	-0.744661	-9.59631	7.02447e-17	9.93522e-16	27.6142	Not-significant
STAMBP	-0.922144	-9.59509	7.07358e-17	9.99394e-16	27.6073	Down-regulated
LRRC32	1.55464	9.59504	7.07557e-17	9.99394e-16	27.607	Up-regulated
UTP3	-0.728346	-9.58769	7.37927e-17	1.04159e-15	27.5654	Not-significant
SULT1A1	-1.53385	-9.58669	7.42184e-17	1.04689e-15	27.5597	Down-regulated
LOC652276	0.490404	9.58551	7.47207e-17	1.05273e-15	27.553	Not-significant
SPATA13	-1.06737	-9.58548	7.47337e-17	1.05273e-15	27.5528	Down-regulated
NME7	2.1961	9.58277	7.59024e-17	1.06847e-15	27.5374	Up-regulated
MED12	0.634661	9.58171	7.63622e-17	1.07422e-15	27.5314	Not-significant
IFITM1	1.52366	9.5803	7.69785e-17	1.08216e-15	27.5234	Up-regulated
NUDT12	-1.80752	-9.57732	7.8306e-17	1.10006e-15	27.5065	Down-regulated
SUGCT	1.17144	9.5772	7.83572e-17	1.10006e-15	27.5058	Up-regulated
HCK	1.67833	9.57142	8.09918e-17	1.13628e-15	27.4731	Up-regulated
PCOLCE	2.02481	9.57039	8.14696e-17	1.14222e-15	27.4672	Up-regulated
MEIS3	0.726079	9.56919	8.20281e-17	1.14927e-15	27.4604	Not-significant
LOXL1	1.74779	9.55868	8.71087e-17	1.21964e-15	27.4009	Up-regulated
FSTL3	1.37575	9.55803	8.74373e-17	1.22342e-15	27.3971	Up-regulated
RREB1	-0.688681	-9.55564	8.86362e-17	1.23936e-15	27.3836	Not-significant
AKAP13	0.94515	9.55476	8.90828e-17	1.24477e-15	27.3786	Up-regulated
TMEM170A	-0.961549	-9.54993	9.15811e-17	1.27883e-15	27.3512	Down-regulated
KLF3	-1.29935	-9.54871	9.22206e-17	1.28689e-15	27.3443	Down-regulated
CYP2R1	-1.14705	-9.54513	9.41241e-17	1.31258e-15	27.3241	Down-regulated
GLE1	-0.757847	-9.54176	9.59575e-17	1.33725e-15	27.3049	Not-significant
ZNF234	-0.690094	-9.54113	9.63052e-17	1.3412e-15	27.3013	Not-significant
R3HDM4	0.530345	9.53369	1.00486e-16	1.39849e-15	27.2592	Not-significant
LNX1	-1.93695	-9.5332	1.00766e-16	1.40145e-15	27.2565	Down-regulated
CNEP1R1	-0.799352	-9.5323	1.0129e-16	1.4078e-15	27.2513	Not-significant
SIX3	0.778005	9.53215	1.01374e-16	1.40803e-15	27.2505	Not-significant
C11orf71	-0.676785	-9.53086	1.02127e-16	1.41755e-15	27.2432	Not-significant
LRRC4C	1.13435	9.52407	1.06166e-16	1.47262e-15	27.2047	Up-regulated
CFAP74	0.542884	9.52305	1.06787e-16	1.48026e-15	27.1989	Not-significant
ST7L	-0.587826	-9.52258	1.07075e-16	1.48326e-15	27.1962	Not-significant
PPP1R21	-0.891117	-9.5191	1.0922e-16	1.51198e-15	27.1766	Not-significant
RASAL1	-1.35175	-9.51658	1.10809e-16	1.53295e-15	27.1623	Down-regulated
GUF1	-1.11997	-9.51617	1.11065e-16	1.53501e-15	27.16	Down-regulated
PPIL4	-1.03085	-9.516	1.11173e-16	1.53501e-15	27.159	Down-regulated
GOLGA4	-1.06702	-9.51599	1.11178e-16	1.53501e-15	27.159	Down-regulated
PRKAR2A	-0.72611	-9.51501	1.11803e-16	1.54261e-15	27.1534	Not-significant
ZNF148	0.702576	9.51447	1.12151e-16	1.54629e-15	27.1503	Not-significant
SERTM1	-0.591927	-9.51436	1.12217e-16	1.54629e-15	27.1497	Not-significant
BCDIN3D	-0.776296	-9.51232	1.13538e-16	1.56345e-15	27.1381	Not-significant
ZNF204P	-1.50966	-9.51195	1.13776e-16	1.5657e-15	27.1361	Down-regulated
CREM	1.2842	9.50955	1.15349e-16	1.58629e-15	27.1224	Up-regulated
PCGF3	-0.765346	-9.50868	1.15919e-16	1.59309e-15	27.1176	Not-significant
IRX3	-1.80476	-9.50819	1.16247e-16	1.59654e-15	27.1148	Down-regulated
SPTY2D1	-0.837859	-9.5076	1.16636e-16	1.60083e-15	27.1114	Not-significant
PGAP4	-1.8132	-9.50331	1.19529e-16	1.63946e-15	27.0872	Down-regulated
NR4A2	2.24437	9.50072	1.21312e-16	1.66282e-15	27.0725	Up-regulated
UAP1	-1.1197	-9.49837	1.22949e-16	1.68415e-15	27.0592	Down-regulated
C2	1.56938	9.49782	1.23337e-16	1.68836e-15	27.0561	Up-regulated
RHOBTB1	-1.61103	-9.49714	1.23818e-16	1.69383e-15	27.0522	Down-regulated
CABLES1	-1.23719	-9.49534	1.25101e-16	1.71026e-15	27.042	Down-regulated
ELF4	-1.00703	-9.49451	1.25693e-16	1.71722e-15	27.0373	Down-regulated
LINC01208	0.626056	9.49325	1.26601e-16	1.7285e-15	27.0302	Not-significant
SLC25A43	-1.23987	-9.48947	1.29364e-16	1.76507e-15	27.0088	Down-regulated
CDC42BPA	-1.83145	-9.48747	1.30849e-16	1.78417e-15	26.9974	Down-regulated
PYROXD1	-1.32601	-9.48649	1.31585e-16	1.79303e-15	26.9919	Down-regulated
CRIP2	1.518	9.48577	1.32125e-16	1.79808e-15	26.9878	Up-regulated
NEURL1	-0.42567	-9.48577	1.32128e-16	1.79808e-15	26.9878	Not-significant
DYRK1B	0.592105	9.48537	1.3243e-16	1.80101e-15	26.9855	Not-significant
CATSPER2	-0.790586	-9.48111	1.35685e-16	1.84402e-15	26.9615	Not-significant
GLIDR	-1.10088	-9.481	1.35769e-16	1.84402e-15	26.9609	Down-regulated
GALNT10	-1.11131	-9.47503	1.40478e-16	1.90674e-15	26.927	Down-regulated
ADCY3	0.643678	9.4748	1.40664e-16	1.90802e-15	26.9257	Not-significant
RBFOX1	0.432531	9.47147	1.4336e-16	1.94333e-15	26.9069	Not-significant
CUL7	0.885571	9.47049	1.44169e-16	1.95302e-15	26.9013	Not-significant
PGBD2	-0.960888	-9.46955	1.44943e-16	1.96223e-15	26.896	Down-regulated
PKIB	-3.24095	-9.46885	1.45525e-16	1.96883e-15	26.8921	Down-regulated
SCARF2	1.54646	9.4678	1.46399e-16	1.97938e-15	26.8861	Up-regulated
SPOCK1	3.10941	9.46564	1.48217e-16	2.00266e-15	26.8739	Up-regulated
STARD8	0.731932	9.46228	1.51085e-16	2.04009e-15	26.8549	Not-significant
TMEM59	-0.8142	-9.46185	1.5146e-16	2.04382e-15	26.8524	Not-significant
TENT4B	-0.777647	-9.46064	1.52502e-16	2.05635e-15	26.8456	Not-significant
LGALS1	1.54938	9.46055	1.52585e-16	2.05635e-15	26.8451	Up-regulated
RPL36AL	-0.77304	-9.45493	1.57554e-16	2.12194e-15	26.8133	Not-significant
GSTZ1	-1.13337	-9.45262	1.59645e-16	2.14872e-15	26.8003	Down-regulated
CDC42EP1	1.37006	9.45178	1.60417e-16	2.15771e-15	26.7955	Up-regulated
P2RY13	1.58686	9.4482	1.63723e-16	2.20076e-15	26.7753	Up-regulated
SLAIN1	-1.86196	-9.44611	1.65688e-16	2.22575e-15	26.7634	Down-regulated
MANSC1	-1.4988	-9.4413	1.70296e-16	2.28617e-15	26.7362	Down-regulated
PLCE1	-1.38043	-9.44096	1.70635e-16	2.28925e-15	26.7343	Down-regulated
HES4	1.41199	9.43998	1.71587e-16	2.30055e-15	26.7287	Up-regulated
NINJ1	0.943961	9.43918	1.72367e-16	2.30952e-15	26.7242	Up-regulated
GTF2H2B	-1.31035	-9.43889	1.72655e-16	2.31189e-15	26.7226	Down-regulated
ERVK13-1	-1.05342	-9.43724	1.74294e-16	2.33231e-15	26.7132	Down-regulated
SLC16A1-AS1	0.568426	9.43713	1.74403e-16	2.33231e-15	26.7126	Not-significant
LOC102724965	-0.799788	-9.43681	1.74717e-16	2.33352e-15	26.7108	Not-significant
FEM1A	-0.58337	-9.43681	1.74718e-16	2.33352e-15	26.7108	Not-significant
EI24	-0.730094	-9.43418	1.7736e-16	2.3673e-15	26.6959	Not-significant
CCDC28A	-0.768993	-9.43279	1.78766e-16	2.38454e-15	26.6881	Not-significant
ACOT11	-1.2721	-9.43206	1.79518e-16	2.39304e-15	26.6839	Down-regulated
ARMT1	-1.17098	-9.42963	1.82021e-16	2.42485e-15	26.6702	Down-regulated
USP46-DT	-0.783689	-9.42892	1.82756e-16	2.43309e-15	26.6662	Not-significant
MAP3K19	0.573329	9.42713	1.84641e-16	2.45662e-15	26.6561	Not-significant
SUCLG2	-1.1961	-9.42583	1.8601e-16	2.47326e-15	26.6487	Down-regulated
LRRC3B	-0.510277	-9.42325	1.88765e-16	2.50829e-15	26.6342	Not-significant
CCDC80	3.32148	9.41737	1.95207e-16	2.59224e-15	26.6009	Up-regulated
SDF2	-0.737393	-9.41666	1.96001e-16	2.60112e-15	26.5969	Not-significant
ARHGAP42	-1.39533	-9.4147	1.98196e-16	2.62859e-15	26.5858	Down-regulated
CDC42-IT1	1.04297	9.41284	2.00312e-16	2.65497e-15	26.5753	Up-regulated
SLC45A4	-1.37807	-9.41117	2.0223e-16	2.67868e-15	26.5659	Down-regulated
ACTA2	2.12147	9.41097	2.02466e-16	2.68011e-15	26.5647	Up-regulated
STX17-DT	0.704722	9.40975	2.03879e-16	2.6971e-15	26.5578	Not-significant
PROM2	-2.9468	-9.40824	2.05633e-16	2.71858e-15	26.5493	Down-regulated
ADAMTS15	-1.92579	-9.40805	2.0586e-16	2.71986e-15	26.5482	Down-regulated
MON2	-0.78701	-9.40516	2.09283e-16	2.76333e-15	26.5319	Not-significant
MINDY3	-0.681861	-9.40468	2.09856e-16	2.76895e-15	26.5292	Not-significant
ME1	-1.88406	-9.40458	2.09974e-16	2.76895e-15	26.5286	Down-regulated
ICAM1	1.46779	9.4032	2.11631e-16	2.78903e-15	26.5208	Up-regulated
OMA1	-0.979034	-9.40295	2.11933e-16	2.79125e-15	26.5194	Down-regulated
LOC105373418	0.631263	9.40282	2.12094e-16	2.79161e-15	26.5187	Not-significant
LRBA	-1.06301	-9.40214	2.12919e-16	2.79906e-15	26.5148	Down-regulated
METAP1	-0.66106	-9.40213	2.12928e-16	2.79906e-15	26.5148	Not-significant
PIGL	-1.12703	-9.39909	2.16648e-16	2.84617e-15	26.4976	Down-regulated
SLC15A3	1.11358	9.39546	2.21182e-16	2.9039e-15	26.4771	Up-regulated
SYNDIG1	1.27945	9.39496	2.21808e-16	2.91028e-15	26.4743	Up-regulated
GFPT2	2.03134	9.39356	2.23591e-16	2.93184e-15	26.4663	Up-regulated
LINC00938	-0.913663	-9.39147	2.26271e-16	2.96511e-15	26.4545	Down-regulated
UGT2B15	-3.52149	-9.39074	2.27213e-16	2.97559e-15	26.4504	Down-regulated
SDAD1	-0.962831	-9.38956	2.28748e-16	2.99381e-15	26.4437	Down-regulated
ABCG1	-1.2808	-9.38864	2.29946e-16	3.0076e-15	26.4385	Down-regulated
DDR2	2.42671	9.38555	2.34037e-16	3.05919e-15	26.4211	Up-regulated
EDF1	-0.60466	-9.38499	2.34785e-16	3.06706e-15	26.4179	Not-significant
ATG10	-0.840371	-9.38081	2.40439e-16	3.13895e-15	26.3943	Not-significant
CRISPLD1	3.26716	9.38057	2.40766e-16	3.14125e-15	26.393	Up-regulated
HARS2	-0.572553	-9.37941	2.42368e-16	3.16018e-15	26.3864	Not-significant
TMEM42	-0.659256	-9.37618	2.46867e-16	3.21682e-15	26.3682	Not-significant
SERAC1	-0.882478	-9.37369	2.50401e-16	3.26084e-15	26.3541	Not-significant
PRKCQ-AS1	-1.15667	-9.37261	2.51938e-16	3.27881e-15	26.348	Down-regulated
PPME1	0.517625	9.37053	2.54949e-16	3.31593e-15	26.3362	Not-significant
MGAM	-2.58015	-9.37003	2.55673e-16	3.32327e-15	26.3334	Down-regulated
FMO1	2.49278	9.36835	2.58125e-16	3.35172e-15	26.324	Up-regulated
GRK2	0.542265	9.36831	2.58183e-16	3.35172e-15	26.3237	Not-significant
VPS37C	-0.638699	-9.36141	2.68544e-16	3.48405e-15	26.2847	Not-significant
PLEKHA4	1.21765	9.35858	2.72907e-16	3.53847e-15	26.2688	Up-regulated
RFX6	-3.14685	-9.35832	2.73302e-16	3.54138e-15	26.2673	Down-regulated
DHTKD1	-1.04477	-9.35625	2.76552e-16	3.58128e-15	26.2556	Down-regulated
SOSTDC1	-4.30898	-9.35547	2.77784e-16	3.595e-15	26.2512	Down-regulated
OSTC	-0.828814	-9.35193	2.83434e-16	3.66584e-15	26.2312	Not-significant
CYP4F12	-1.38181	-9.3515	2.8414e-16	3.67028e-15	26.2288	Down-regulated
SHTN1	-1.36962	-9.35135	2.84373e-16	3.67028e-15	26.228	Down-regulated
VPS13C-DT	0.357646	9.35121	2.84597e-16	3.67028e-15	26.2272	Not-significant
CST3	1.03818	9.35119	2.84631e-16	3.67028e-15	26.2271	Up-regulated
ACAA1	-0.933705	-9.35118	2.84657e-16	3.67028e-15	26.227	Down-regulated
RALGAPB	-0.734514	-9.35023	2.86192e-16	3.6878e-15	26.2216	Not-significant
DIPK2B	0.783479	9.34964	2.87164e-16	3.69803e-15	26.2183	Not-significant
GATA6	-2.37847	-9.34772	2.90319e-16	3.73497e-15	26.2075	Down-regulated
VPS4B	-1.05524	-9.34768	2.9039e-16	3.73497e-15	26.2072	Down-regulated
LINC01119	0.755335	9.34369	2.97055e-16	3.81834e-15	26.1847	Not-significant
PPCS	-0.745824	-9.34303	2.98167e-16	3.83028e-15	26.181	Not-significant
ATP6V1F	0.702076	9.34216	2.99651e-16	3.84696e-15	26.1761	Not-significant
CASP3	-1.31865	-9.34052	3.02475e-16	3.88083e-15	26.1668	Down-regulated
NUDT16	-0.846254	-9.34009	3.03202e-16	3.88777e-15	26.1644	Not-significant
ACTB	0.422347	9.33952	3.04202e-16	3.8982e-15	26.1612	Not-significant
CDC42SE1	-1.00957	-9.337	3.08595e-16	3.95206e-15	26.1469	Down-regulated
SH3BGRL2	-1.92079	-9.33642	3.09609e-16	3.96262e-15	26.1437	Down-regulated
NABP2	0.904946	9.33546	3.11307e-16	3.98191e-15	26.1383	Up-regulated
DCUN1D3	0.774672	9.33514	3.11874e-16	3.98671e-15	26.1365	Not-significant
HMGN5	-1.60271	-9.33419	3.13559e-16	4.0058e-15	26.1311	Down-regulated
EFNB2	-1.30996	-9.33135	3.18679e-16	4.06872e-15	26.1151	Down-regulated
PRDM4	-0.494335	-9.3307	3.19861e-16	4.08131e-15	26.1114	Not-significant
RAB11B	0.555297	9.32926	3.2249e-16	4.11234e-15	26.1033	Not-significant
WHAMM	-0.637356	-9.32646	3.27679e-16	4.17596e-15	26.0875	Not-significant
TAF1A-AS1	-1.03689	-9.32626	3.28051e-16	4.17814e-15	26.0864	Down-regulated
CIAO2B	-0.68592	-9.32596	3.28617e-16	4.18281e-15	26.0846	Not-significant
MARVELD2	-2.01066	-9.32522	3.29997e-16	4.19781e-15	26.0805	Down-regulated
FBXW11	-0.575629	-9.32462	3.31124e-16	4.20957e-15	26.0771	Not-significant
LOC730101	-1.26153	-9.32171	3.36656e-16	4.2773e-15	26.0607	Down-regulated
AGBL3	-0.862142	-9.32154	3.36987e-16	4.2789e-15	26.0597	Not-significant
GDPD5	1.08345	9.31898	3.41924e-16	4.33894e-15	26.0453	Up-regulated
PDCD4	-1.38554	-9.31774	3.44351e-16	4.36709e-15	26.0383	Down-regulated
DMPK	2.27412	9.31757	3.44674e-16	4.36852e-15	26.0374	Up-regulated
MPHOSPH8	-0.752415	-9.31731	3.45197e-16	4.37249e-15	26.0359	Not-significant
AP5B1	0.541034	9.31532	3.49133e-16	4.41967e-15	26.0246	Not-significant
STAM2	-0.890326	-9.31213	3.5553e-16	4.49792e-15	26.0066	Not-significant
ANKRD42-DT	-0.961902	-9.31075	3.5832e-16	4.53047e-15	25.9989	Down-regulated
CPD	-1.47851	-9.30956	3.60762e-16	4.55858e-15	25.9921	Down-regulated
LYRM2	-1.0072	-9.30902	3.61864e-16	4.56974e-15	25.9891	Down-regulated
ZNF141	-0.939099	-9.30796	3.64065e-16	4.59475e-15	25.9831	Down-regulated
HTATIP2	-1.57756	-9.30628	3.6755e-16	4.63593e-15	25.9737	Down-regulated
ZNF485	-0.683834	-9.30426	3.71809e-16	4.68682e-15	25.9623	Not-significant
SMIM4	-0.878147	-9.3041	3.72153e-16	4.68831e-15	25.9613	Not-significant
HEYL	2.1148	9.30126	3.78205e-16	4.76168e-15	25.9454	Up-regulated
P4HA3	1.21082	9.29927	3.8252e-16	4.8131e-15	25.9341	Up-regulated
BAG1	-0.862946	-9.29798	3.85342e-16	4.84569e-15	25.9268	Not-significant
RASSF6	-3.26084	-9.29711	3.87243e-16	4.86666e-15	25.9219	Down-regulated
H6PD	0.823108	9.29389	3.94401e-16	4.95364e-15	25.9038	Not-significant
CH25H	1.90068	9.29295	3.96513e-16	4.97717e-15	25.8985	Up-regulated
MXD1	-1.59225	-9.2903	4.0253e-16	5.04966e-15	25.8836	Down-regulated
FAN1	-0.62325	-9.28943	4.04545e-16	5.07189e-15	25.8786	Not-significant
RUFY2	-1.01261	-9.28809	4.07633e-16	5.10754e-15	25.8711	Down-regulated
SLC16A5	-1.82965	-9.28487	4.15168e-16	5.19882e-15	25.8529	Down-regulated
GABPB2	-1.09897	-9.27972	4.2751e-16	5.35016e-15	25.8239	Down-regulated
IRF2BP2	0.84095	9.27653	4.35339e-16	5.44487e-15	25.8059	Not-significant
TGM2	1.91331	9.27504	4.39035e-16	5.48781e-15	25.7975	Up-regulated
XAB2	0.827459	9.27417	4.41224e-16	5.51186e-15	25.7926	Not-significant
LIN7C	-0.884043	-9.27281	4.4463e-16	5.55109e-15	25.785	Not-significant
SYNPO2L	0.57815	9.26772	4.57694e-16	5.71077e-15	25.7563	Not-significant
PTK6	-2.29377	-9.26684	4.59996e-16	5.73606e-15	25.7513	Down-regulated
CD86	1.54876	9.26326	4.69459e-16	5.85057e-15	25.7311	Up-regulated
KIAA0895	-1.58808	-9.26247	4.71565e-16	5.87331e-15	25.7267	Down-regulated
CIDEC	-1.86372	-9.26164	4.73808e-16	5.89535e-15	25.722	Down-regulated
HOTTIP	0.844336	9.2616	4.739e-16	5.89535e-15	25.7218	Not-significant
HAPLN4	-1.14466	-9.26121	4.74961e-16	5.90503e-15	25.7196	Down-regulated
LOC101928343	0.606452	9.25945	4.79737e-16	5.96085e-15	25.7097	Not-significant
TBCCD1	-0.860104	-9.25809	4.83464e-16	6.00358e-15	25.702	Not-significant
MAPK12	0.707573	9.25753	4.85003e-16	6.01912e-15	25.6989	Not-significant
CD163	1.71945	9.25722	4.85862e-16	6.02619e-15	25.6971	Up-regulated
CLN8	0.760269	9.25579	4.89828e-16	6.07177e-15	25.6891	Not-significant
MSL1	-0.803711	-9.25391	4.95089e-16	6.13334e-15	25.6785	Not-significant
PLA2G2A	4.07908	9.25322	4.97034e-16	6.15378e-15	25.6746	Up-regulated
ACVR1B	-1.1632	-9.25073	5.04108e-16	6.23767e-15	25.6606	Down-regulated
LENG1	-0.57764	-9.24699	5.14933e-16	6.36783e-15	25.6395	Not-significant
NID2	1.85255	9.24441	5.22556e-16	6.45827e-15	25.625	Up-regulated
GRIA3	-0.416163	-9.24283	5.2727e-16	6.51267e-15	25.6161	Not-significant
ELK1	0.520464	9.24232	5.28786e-16	6.52753e-15	25.6132	Not-significant
ARHGEF28	-1.58715	-9.24187	5.30155e-16	6.54057e-15	25.6107	Down-regulated
MICALL1	-1.28816	-9.24143	5.31462e-16	6.55281e-15	25.6082	Down-regulated
SACM1L	-0.746461	-9.24059	5.34e-16	6.58021e-15	25.6035	Not-significant
FADS3	1.11843	9.23929	5.37973e-16	6.62526e-15	25.5961	Up-regulated
SOCS1	1.49867	9.23439	5.53162e-16	6.80829e-15	25.5686	Up-regulated
NOP10	-0.651466	-9.23126	5.63099e-16	6.92652e-15	25.5509	Not-significant
ARHGDIA	0.750104	9.23094	5.64118e-16	6.93496e-15	25.5491	Not-significant
MIR22HG	-1.27088	-9.23035	5.6601e-16	6.95412e-15	25.5458	Down-regulated
MYC	1.20491	9.22586	5.80633e-16	7.12959e-15	25.5205	Up-regulated
MYO1F	1.07111	9.22531	5.82435e-16	7.14751e-15	25.5175	Up-regulated
FOSB	2.74863	9.22385	5.87302e-16	7.20299e-15	25.5092	Up-regulated
BBLN	0.884504	9.21684	6.11162e-16	7.49123e-15	25.4697	Not-significant
TAMALIN	0.593136	9.2167	6.11627e-16	7.49252e-15	25.469	Not-significant
ADAM19	1.28864	9.21506	6.17371e-16	7.55845e-15	25.4597	Up-regulated
CASP6	-1.34261	-9.21476	6.18399e-16	7.56659e-15	25.4581	Down-regulated
LARP1B	-1.29962	-9.21253	6.26302e-16	7.6588e-15	25.4455	Down-regulated
GLP1R	0.617055	9.20707	6.46032e-16	7.89544e-15	25.4148	Not-significant
NDUFS4	-0.865006	-9.20676	6.47153e-16	7.90452e-15	25.413	Not-significant
MTSS2	1.55064	9.20514	6.53158e-16	7.97319e-15	25.4039	Up-regulated
ADAMTS5	1.48001	9.20299	6.61155e-16	8.05841e-15	25.3918	Up-regulated
ATP13A1	0.806699	9.20295	6.61298e-16	8.05841e-15	25.3916	Not-significant
TPSAB1	2.05746	9.20295	6.61298e-16	8.05841e-15	25.3916	Up-regulated
PLPP3	1.35995	9.20243	6.63287e-16	8.07792e-15	25.3886	Up-regulated
IL1A	0.933538	9.19991	6.72832e-16	8.1894e-15	25.3745	Up-regulated
MNDA	1.99855	9.19976	6.73409e-16	8.19163e-15	25.3736	Up-regulated
CYP2C9	-3.14165	-9.19837	6.78724e-16	8.25147e-15	25.3659	Down-regulated
FCGR2C	1.38774	9.19749	6.82127e-16	8.28802e-15	25.3609	Up-regulated
PLD1	-1.37188	-9.1969	6.84439e-16	8.31127e-15	25.3575	Down-regulated
LSM6	-0.842623	-9.19661	6.85556e-16	8.31999e-15	25.3559	Not-significant
TET2	-0.80022	-9.19641	6.86331e-16	8.32456e-15	25.3548	Not-significant
AKAP17A	-0.62922	-9.19479	6.92657e-16	8.3964e-15	25.3457	Not-significant
TRIOBP	-0.669244	-9.18905	7.15631e-16	8.66985e-15	25.3134	Not-significant
STXBP2	1.14705	9.18841	7.1823e-16	8.69629e-15	25.3098	Up-regulated
TRPM4	-1.29503	-9.18575	7.29137e-16	8.82323e-15	25.2949	Down-regulated
RNH1	0.630517	9.18119	7.48276e-16	9.04959e-15	25.2692	Not-significant
SELENOO	-0.747909	-9.17949	7.5552e-16	9.1319e-15	25.2596	Not-significant
COL1A1	1.29727	9.17916	7.56913e-16	9.14343e-15	25.2578	Up-regulated
ABCC6	-1.61876	-9.17897	7.57763e-16	9.1484e-15	25.2567	Down-regulated
NRDE2	-0.574557	-9.1788	7.58488e-16	9.15186e-15	25.2558	Not-significant
MYOD1	0.469093	9.17753	7.63983e-16	9.21284e-15	25.2486	Not-significant
APOE	2.16775	9.17603	7.70504e-16	9.28611e-15	25.2402	Up-regulated
HCG9	-0.416794	-9.17569	7.71967e-16	9.29837e-15	25.2383	Not-significant
AKT1	0.768637	9.17486	7.75614e-16	9.33691e-15	25.2336	Not-significant
SOCS6	-1.39306	-9.17437	7.7777e-16	9.35747e-15	25.2309	Down-regulated
MTRF1L	-0.838198	-9.17375	7.80547e-16	9.38546e-15	25.2273	Not-significant
XYLT1	-1.25493	-9.17294	7.84105e-16	9.42281e-15	25.2228	Down-regulated
PIWIL4	-1.16433	-9.17248	7.86162e-16	9.44209e-15	25.2202	Down-regulated
SERPING1	2.00238	9.17083	7.9357e-16	9.52558e-15	25.211	Up-regulated
MEAK7	-0.858993	-9.16891	8.02274e-16	9.62452e-15	25.2001	Not-significant
PDIA4	-1.24765	-9.16793	8.06733e-16	9.67245e-15	25.1947	Down-regulated
PYGL	1.30946	9.16734	8.0946e-16	9.69957e-15	25.1913	Up-regulated
TOB2	-0.833127	-9.16664	8.12655e-16	9.73226e-15	25.1874	Not-significant
IPO11	0.404547	9.16348	8.27384e-16	9.90298e-15	25.1696	Not-significant
FAM102A	-0.920755	-9.16329	8.28267e-16	9.90786e-15	25.1686	Down-regulated
CCDC86	0.78702	9.16027	8.42555e-16	1.0073e-14	25.1516	Not-significant
GARS1-DT	0.672892	9.15653	8.60655e-16	1.02835e-14	25.1305	Not-significant
RASSF1	-0.622004	-9.15591	8.63681e-16	1.03138e-14	25.1271	Not-significant
ZNF57	-1.56273	-9.1513	8.86559e-16	1.05805e-14	25.1012	Down-regulated
BCL6	1.63655	9.1512	8.87031e-16	1.05805e-14	25.1006	Up-regulated
VSIG2	-3.92973	-9.15013	8.92462e-16	1.06392e-14	25.0946	Down-regulated
NAB1	-0.986215	-9.14959	8.95205e-16	1.06658e-14	25.0915	Down-regulated
TNFRSF14	-0.896777	-9.14772	9.0474e-16	1.07732e-14	25.0811	Not-significant
C3AR1	1.25349	9.14506	9.18503e-16	1.09309e-14	25.0661	Up-regulated
LMNA	0.873705	9.14337	9.27304e-16	1.10293e-14	25.0566	Not-significant
HOXC6	3.26757	9.14323	9.28061e-16	1.1032e-14	25.0558	Up-regulated
KLK3	0.609984	9.1431	9.28722e-16	1.10336e-14	25.0551	Not-significant
ATP1A1-AS1	-0.68045	-9.14243	9.32267e-16	1.10694e-14	25.0514	Not-significant
SULT1A2	-1.42857	-9.14225	9.33217e-16	1.10744e-14	25.0503	Down-regulated
SNX33	-0.820264	-9.14215	9.3378e-16	1.10748e-14	25.0498	Not-significant
BDKRB1	1.13866	9.1415	9.37203e-16	1.11091e-14	25.0461	Up-regulated
PRB4	0.536324	9.14103	9.39701e-16	1.11323e-14	25.0435	Not-significant
LATS2	1.16284	9.13649	9.64213e-16	1.14162e-14	25.018	Up-regulated
HIVEP2	0.688942	9.13456	9.74807e-16	1.15304e-14	25.0071	Not-significant
COL4A2	1.84984	9.13454	9.74962e-16	1.15304e-14	25.007	Up-regulated
WASHC3	-0.75662	-9.1323	9.87411e-16	1.1671e-14	24.9944	Not-significant
TMEM223	-0.89843	-9.13215	9.88214e-16	1.16739e-14	24.9936	Not-significant
PPP1R36	-1.92858	-9.13186	9.89855e-16	1.16867e-14	24.992	Down-regulated
LRP1	0.86707	9.13096	9.94921e-16	1.17398e-14	24.9869	Not-significant
TRIM56	-0.761081	-9.13065	9.96675e-16	1.17539e-14	24.9852	Not-significant
ABTB1	0.829228	9.12844	1.00925e-15	1.18955e-14	24.9727	Not-significant
RBM4B	-0.613849	-9.12811	1.01115e-15	1.19111e-14	24.9709	Not-significant
SNHG3	-1.07134	-9.128	1.01177e-15	1.19117e-14	24.9703	Down-regulated
SMTN	3.14614	9.12735	1.01551e-15	1.1949e-14	24.9666	Up-regulated
IFT172	-1.01713	-9.12668	1.01934e-15	1.19873e-14	24.9629	Down-regulated
RAB4B	0.820422	9.12612	1.02258e-15	1.20187e-14	24.9597	Not-significant
POLD4	-1.00458	-9.12352	1.0378e-15	1.21907e-14	24.9451	Down-regulated
SSBP3	-0.966571	-9.12305	1.04057e-15	1.22163e-14	24.9425	Down-regulated
RIPOR1	0.908152	9.12158	1.04926e-15	1.23114e-14	24.9342	Up-regulated
PCGF5	-1.17709	-9.12076	1.05416e-15	1.2362e-14	24.9296	Down-regulated
NDUFC1	-0.590508	-9.12056	1.05535e-15	1.2369e-14	24.9285	Not-significant
ZNF763	-0.850166	-9.11977	1.0601e-15	1.24177e-14	24.924	Not-significant
VTI1B	-0.515202	-9.11931	1.06283e-15	1.24426e-14	24.9215	Not-significant
ARID1A	0.78067	9.11784	1.07174e-15	1.25399e-14	24.9132	Not-significant
EVI5L	0.807566	9.11216	1.10678e-15	1.29426e-14	24.8814	Not-significant
BRF1	0.569716	9.10951	1.12353e-15	1.31312e-14	24.8665	Not-significant
RNF141	-1.12125	-9.10631	1.14411e-15	1.33641e-14	24.8485	Down-regulated
PDCD1LG2	0.753145	9.1044	1.15654e-15	1.35019e-14	24.8378	Not-significant
LOC100506302	-1.00763	-9.1033	1.16377e-15	1.35786e-14	24.8316	Down-regulated
ATM	1.02151	9.10178	1.17381e-15	1.36881e-14	24.8231	Up-regulated
PPM1B	-0.725937	-9.10068	1.18119e-15	1.37665e-14	24.8169	Not-significant
CYP1B1	3.14516	9.10037	1.18328e-15	1.37831e-14	24.8151	Up-regulated
GAS7	1.4441	9.09981	1.18704e-15	1.38192e-14	24.812	Up-regulated
STEAP3	-1.40244	-9.09787	1.2001e-15	1.39634e-14	24.8012	Down-regulated
STOML1	-0.623517	-9.09708	1.20553e-15	1.40188e-14	24.7967	Not-significant
ADAT1	-0.892936	-9.0934	1.2309e-15	1.43059e-14	24.7761	Not-significant
CD81	1.10654	9.09156	1.2438e-15	1.44478e-14	24.7657	Up-regulated
HYLS1	-1.1979	-9.09112	1.24687e-15	1.44754e-14	24.7633	Down-regulated
GAPDH	0.618433	9.09048	1.25143e-15	1.45203e-14	24.7597	Not-significant
C1orf162	1.4685	9.08311	1.30474e-15	1.51304e-14	24.7183	Up-regulated
HIPK2	-1.29427	-9.08168	1.31535e-15	1.52449e-14	24.7103	Down-regulated
ATP5MC3	-0.893925	-9.07482	1.3675e-15	1.58405e-14	24.6718	Not-significant
ARID5B	1.22124	9.07432	1.37139e-15	1.58767e-14	24.669	Up-regulated
PAQR7	-0.584483	-9.06964	1.40818e-15	1.62937e-14	24.6428	Not-significant
MXRA8	1.67269	9.06934	1.41054e-15	1.63119e-14	24.6411	Up-regulated
CAD	0.884529	9.06648	1.43363e-15	1.65697e-14	24.625	Not-significant
LOC644656	-1.02718	-9.06506	1.44518e-15	1.6694e-14	24.6171	Down-regulated
PYM1	-0.751068	-9.0627	1.46457e-15	1.69064e-14	24.6039	Not-significant
SMG1	-0.907129	-9.06263	1.46519e-15	1.69064e-14	24.6034	Down-regulated
TM6SF2	-1.50647	-9.06207	1.46986e-15	1.69484e-14	24.6003	Down-regulated
CDHR2	-2.21228	-9.06199	1.47045e-15	1.69484e-14	24.5999	Down-regulated
EMILIN3	1.03174	9.06092	1.47944e-15	1.70426e-14	24.5939	Up-regulated
RNF220	0.457519	9.05806	1.50356e-15	1.73109e-14	24.5778	Not-significant
GCNT1	-2.53815	-9.05296	1.54764e-15	1.78085e-14	24.5492	Down-regulated
PPP1R1C	-0.90192	-9.05266	1.55025e-15	1.78287e-14	24.5475	Down-regulated
PACS1	0.745333	9.05204	1.55568e-15	1.78813e-14	24.5441	Not-significant
RDH13	-0.979721	-9.05115	1.56357e-15	1.79621e-14	24.5391	Down-regulated
RRN3P2	1.20849	9.05068	1.56772e-15	1.79991e-14	24.5364	Up-regulated
STAC2	0.602998	9.05059	1.56852e-15	1.79991e-14	24.5359	Not-significant
WDR44	-0.916355	-9.04768	1.59451e-15	1.82873e-14	24.5197	Down-regulated
LRRC45	-0.623656	-9.04723	1.59858e-15	1.8324e-14	24.5171	Not-significant
OST4	-0.526434	-9.04391	1.62892e-15	1.86614e-14	24.4985	Not-significant
CDH13	1.07612	9.04375	1.6304e-15	1.86682e-14	24.4976	Up-regulated
LAIR1	1.18602	9.04333	1.63426e-15	1.87021e-14	24.4953	Up-regulated
CRYGS	-0.615201	-9.04242	1.6427e-15	1.87883e-14	24.4902	Not-significant
LIPE	1.02284	9.04095	1.65646e-15	1.89354e-14	24.4819	Up-regulated
STYX	-0.708376	-9.04006	1.66477e-15	1.902e-14	24.4769	Not-significant
ID3	-1.1876	-9.03737	1.69032e-15	1.93012e-14	24.4619	Down-regulated
LGALS8	-0.872004	-9.03706	1.69322e-15	1.93239e-14	24.4602	Not-significant
MAP1A	1.81015	9.03597	1.70372e-15	1.94331e-14	24.454	Up-regulated
FKBP1B	-1.93133	-9.03427	1.72021e-15	1.96103e-14	24.4445	Down-regulated
GSTM1	1.18356	9.03225	1.73994e-15	1.98245e-14	24.4332	Up-regulated
CIC	0.664344	9.03113	1.751e-15	1.99396e-14	24.4269	Not-significant
ARSB	0.886437	9.02968	1.76544e-15	2.0093e-14	24.4188	Not-significant
TM6SF1	1.37456	9.02953	1.76691e-15	2.00989e-14	24.418	Up-regulated
TAGLN2	-1.02828	-9.02363	1.82693e-15	2.07703e-14	24.3849	Down-regulated
DPYSL3	2.59978	9.02262	1.83739e-15	2.08778e-14	24.3792	Up-regulated
FBXL14	-0.963148	-9.02196	1.84426e-15	2.09444e-14	24.3755	Down-regulated
PLLP	-2.58541	-9.02073	1.85712e-15	2.1079e-14	24.3686	Down-regulated
ZNF605	-1.34461	-9.01702	1.89644e-15	2.15137e-14	24.3479	Down-regulated
CFAP157	0.424326	9.01562	1.91153e-15	2.1673e-14	24.34	Not-significant
GAREM1	-1.52108	-9.01539	1.91398e-15	2.1689e-14	24.3388	Down-regulated
EGR3	2.14376	9.01513	1.91682e-15	2.17094e-14	24.3373	Up-regulated
TET3	-1.10502	-9.01366	1.93286e-15	2.18791e-14	24.329	Down-regulated
PPP1R37	-0.827794	-9.01264	1.944e-15	2.19933e-14	24.3234	Not-significant
ENTPD3-AS1	-0.540968	-9.0124	1.94663e-15	2.20112e-14	24.322	Not-significant
FAM89B	0.751805	9.01048	1.96787e-15	2.22392e-14	24.3113	Not-significant
CCNYL1	-0.867357	-9.00954	1.97843e-15	2.23465e-14	24.306	Not-significant
LTK	-0.808089	-9.00801	1.99559e-15	2.25281e-14	24.2974	Not-significant
PFDN6	-0.789351	-9.00746	2.00179e-15	2.25859e-14	24.2943	Not-significant
SEPTIN7P13	1.04137	9.00697	2.00733e-15	2.26361e-14	24.2916	Up-regulated
FARP2	-0.971673	-9.00616	2.01657e-15	2.27281e-14	24.2871	Down-regulated
ABAT	-1.63116	-9.00272	2.05613e-15	2.31615e-14	24.2678	Down-regulated
SIGLEC7	0.630999	9.0023	2.06107e-15	2.32045e-14	24.2654	Not-significant
FRG1	-0.76892	-9.00166	2.06848e-15	2.32754e-14	24.2619	Not-significant
FUT8	-1.32559	-8.9967	2.12733e-15	2.39247e-14	24.2341	Down-regulated
CCZ1B	0.947254	8.99652	2.12951e-15	2.39293e-14	24.2331	Up-regulated
NAA80	0.592379	8.99647	2.13003e-15	2.39293e-14	24.2328	Not-significant
SPATA18	-1.56872	-8.99462	2.15245e-15	2.41682e-14	24.2225	Down-regulated
LOC101928762	-0.602292	-8.99327	2.169e-15	2.43409e-14	24.2149	Not-significant
ATP6V0C	0.568595	8.9922	2.18207e-15	2.44744e-14	24.2089	Not-significant
CABIN1	0.711514	8.99161	2.18936e-15	2.45429e-14	24.2056	Not-significant
TRAV30	0.396876	8.9912	2.19445e-15	2.45868e-14	24.2033	Not-significant
PCDHB11	0.695086	8.99109	2.19585e-15	2.45893e-14	24.2027	Not-significant
TBC1D8B	-1.43088	-8.99038	2.20472e-15	2.46753e-14	24.1987	Down-regulated
ASTE1	-0.729489	-8.98819	2.2321e-15	2.49684e-14	24.1865	Not-significant
STK38	-0.750658	-8.9878	2.23706e-15	2.50104e-14	24.1843	Not-significant
ZNF334	-0.734381	-8.98729	2.24351e-15	2.50691e-14	24.1814	Not-significant
TXNL4B	-0.535968	-8.98391	2.28671e-15	2.55381e-14	24.1625	Not-significant
LRSAM1	0.662798	8.98005	2.33717e-15	2.60814e-14	24.1409	Not-significant
TUSC2	-0.734086	-8.98	2.33785e-15	2.60814e-14	24.1406	Not-significant
ULBP3	-0.469072	-8.97969	2.34194e-15	2.61131e-14	24.1389	Not-significant
RASEF	-1.40879	-8.97739	2.37253e-15	2.64401e-14	24.126	Down-regulated
SIRT5	-0.823832	-8.97701	2.37768e-15	2.64832e-14	24.1239	Not-significant
ITGAM	1.37579	8.97641	2.38571e-15	2.65547e-14	24.1206	Up-regulated
SYCP2	-1.52341	-8.97634	2.38664e-15	2.65547e-14	24.1202	Down-regulated
MTRES1	-0.867203	-8.97205	2.4452e-15	2.71918e-14	24.0962	Not-significant
FLJ20021	-0.615037	-8.97129	2.45569e-15	2.72939e-14	24.0919	Not-significant
FBXL18	0.557678	8.96981	2.47628e-15	2.75081e-14	24.0837	Not-significant
IL1R2	-3.32834	-8.96811	2.50024e-15	2.77594e-14	24.0741	Down-regulated
TMED10	-0.732378	-8.96752	2.50857e-15	2.78371e-14	24.0708	Not-significant
DYSF	1.06581	8.9666	2.52157e-15	2.79665e-14	24.0657	Up-regulated
ATP5IF1	-0.752686	-8.96606	2.52932e-15	2.80375e-14	24.0627	Not-significant
RAB11FIP4	-1.26294	-8.96596	2.53072e-15	2.80382e-14	24.0621	Down-regulated
RAD18	0.915238	8.96507	2.5435e-15	2.81648e-14	24.0571	Up-regulated
UQCC3	-0.86218	-8.96461	2.55005e-15	2.82223e-14	24.0546	Not-significant
SHROOM3	-2.0487	-8.96345	2.56691e-15	2.83939e-14	24.0481	Down-regulated
CAMK1D	1.31763	8.96112	2.60086e-15	2.87542e-14	24.035	Up-regulated
DNAJC18	0.839746	8.96071	2.60691e-15	2.88058e-14	24.0327	Not-significant
SST	-5.27108	-8.95564	2.68262e-15	2.96267e-14	24.0044	Down-regulated
PDCL	-0.642254	-8.95486	2.69444e-15	2.97414e-14	24	Not-significant
GAK	-0.670586	-8.95392	2.70875e-15	2.98836e-14	23.9948	Not-significant
CAPN8	-3.69425	-8.95253	2.73007e-15	3.0103e-14	23.987	Down-regulated
FOXA2	-2.22185	-8.95061	2.75984e-15	3.04151e-14	23.9763	Down-regulated
FRAT2	-1.08602	-8.94572	2.8371e-15	3.12501e-14	23.9489	Down-regulated
TRIM16	-1.57158	-8.94424	2.86082e-15	3.14947e-14	23.9407	Down-regulated
YBX2	1.03076	8.9433	2.87608e-15	3.1646e-14	23.9354	Up-regulated
ALKBH7	-0.84205	-8.94295	2.88179e-15	3.16921e-14	23.9335	Not-significant
YJU2B	-0.414681	-8.94233	2.89198e-15	3.17874e-14	23.93	Not-significant
PLCB2	0.545883	8.94201	2.89708e-15	3.18267e-14	23.9282	Not-significant
CEACAM4	0.428772	8.94064	2.91961e-15	3.20573e-14	23.9205	Not-significant
ZNF407-AS1	-0.798795	-8.94011	2.92835e-15	3.21364e-14	23.9176	Not-significant
ANXA6	1.43225	8.93672	2.98493e-15	3.274e-14	23.8986	Up-regulated
OR1I1	0.538987	8.93641	2.99013e-15	3.27798e-14	23.8969	Not-significant
CRIP1	-1.82779	-8.93619	2.9939e-15	3.2804e-14	23.8957	Down-regulated
AFF4	-0.852456	-8.93456	3.02154e-15	3.30894e-14	23.8866	Not-significant
ZNF292	1.12432	8.93001	3.10002e-15	3.39311e-14	23.8612	Up-regulated
LRP4	-1.76007	-8.92863	3.12431e-15	3.41791e-14	23.8534	Down-regulated
CYRIA	1.26624	8.92745	3.14524e-15	3.439e-14	23.8468	Up-regulated
G6PD	1.01913	8.92714	3.15079e-15	3.44326e-14	23.8451	Up-regulated
GOLM2	-0.787665	-8.92424	3.20268e-15	3.49623e-14	23.8289	Not-significant
SPP1	4.05506	8.9242	3.20333e-15	3.49623e-14	23.8287	Up-regulated
MAN2A1	-0.956385	-8.92415	3.20429e-15	3.49623e-14	23.8284	Down-regulated
SH3PXD2B	1.33786	8.92144	3.25358e-15	3.54815e-14	23.8133	Up-regulated
LINC02888	-0.584598	-8.9186	3.30624e-15	3.60369e-14	23.7974	Not-significant
IKZF5	-0.854637	-8.91827	3.31237e-15	3.60849e-14	23.7955	Not-significant
ZMYND12	-0.968325	-8.91674	3.34113e-15	3.63792e-14	23.787	Down-regulated
HSD11B1	2.08989	8.91472	3.37931e-15	3.67757e-14	23.7757	Up-regulated
CARD14	0.461558	8.91434	3.38658e-15	3.68357e-14	23.7736	Not-significant
RNF14	-0.833305	-8.91304	3.4115e-15	3.70874e-14	23.7663	Not-significant
KIF16B	-1.87625	-8.91285	3.41508e-15	3.7107e-14	23.7653	Down-regulated
PWWP2B	-0.792313	-8.91138	3.44369e-15	3.73984e-14	23.757	Not-significant
CEMIP	2.87896	8.91118	3.44758e-15	3.74212e-14	23.7559	Up-regulated
MAFB	1.47779	8.90508	3.56814e-15	3.87096e-14	23.7219	Up-regulated
TNRC6B	-1.05839	-8.90292	3.61181e-15	3.9163e-14	23.7098	Down-regulated
ARPC3	-0.772016	-8.89851	3.70279e-15	4.01286e-14	23.6852	Not-significant
SNX4	-0.872218	-8.89625	3.75033e-15	4.06227e-14	23.6726	Not-significant
VILL	-2.48469	-8.89542	3.76774e-15	4.07902e-14	23.668	Down-regulated
DNAJC3	-0.911241	-8.89395	3.79912e-15	4.11085e-14	23.6598	Down-regulated
LOC105369228	-1.26873	-8.89226	3.83548e-15	4.14804e-14	23.6503	Down-regulated
TJP2	-0.953669	-8.89078	3.86772e-15	4.18075e-14	23.6421	Down-regulated
CAMKK1	0.531014	8.88956	3.89442e-15	4.20742e-14	23.6352	Not-significant
SIRT2	0.606619	8.88854	3.91693e-15	4.22956e-14	23.6295	Not-significant
VDAC1	-0.927111	-8.88748	3.94024e-15	4.25252e-14	23.6237	Down-regulated
CRY1	-0.964475	-8.88732	3.94395e-15	4.25432e-14	23.6227	Down-regulated
NFATC3	0.486905	8.88694	3.95241e-15	4.26125e-14	23.6206	Not-significant
PRO1804	-0.304323	-8.88669	3.95778e-15	4.26483e-14	23.6193	Not-significant
FLNA	2.53771	8.88614	3.97013e-15	4.27594e-14	23.6162	Up-regulated
SCGN	-1.89579	-8.886	3.97334e-15	4.27718e-14	23.6154	Down-regulated
AKR1C1	-2.44712	-8.88561	3.98215e-15	4.28446e-14	23.6132	Down-regulated
FAM83F	-1.44749	-8.88548	3.98501e-15	4.28533e-14	23.6125	Down-regulated
HAGH	-0.502068	-8.88527	3.98966e-15	4.28811e-14	23.6113	Not-significant
PRLR	-2.18689	-8.88505	3.99474e-15	4.29136e-14	23.6101	Down-regulated
WASL	-0.792086	-8.88456	4.0057e-15	4.30092e-14	23.6073	Not-significant
CFAP206	0.516173	8.88239	4.05499e-15	4.3516e-14	23.5952	Not-significant
ZADH2	-0.951023	-8.88212	4.06118e-15	4.35601e-14	23.5937	Down-regulated
PPARA	-0.891647	-8.88183	4.0678e-15	4.36087e-14	23.5921	Not-significant
TMEM40	0.423633	8.88123	4.08165e-15	4.37347e-14	23.5887	Not-significant
CXCL8	4.1173	8.88101	4.08667e-15	4.3766e-14	23.5875	Up-regulated
MED6	-0.72344	-8.87775	4.16233e-15	4.45534e-14	23.5694	Not-significant
CSF2RA	1.26594	8.87669	4.18736e-15	4.47983e-14	23.5634	Up-regulated
GLIPR1	1.4712	8.87519	4.22284e-15	4.51548e-14	23.5551	Up-regulated
PRRG4	-1.94125	-8.87449	4.23955e-15	4.53102e-14	23.5512	Down-regulated
LOC101929165	-0.57433	-8.87414	4.24801e-15	4.53774e-14	23.5492	Not-significant
ERCC5	-0.730111	-8.87033	4.34012e-15	4.63376e-14	23.5279	Not-significant
MST1L	-2.03221	-8.86453	4.48427e-15	4.78521e-14	23.4956	Down-regulated
ZFYVE19	-0.530555	-8.86262	4.53281e-15	4.83454e-14	23.4849	Not-significant
ALDH1B1	1.79836	8.85167	4.82114e-15	5.13943e-14	23.4239	Up-regulated
CCNT1	-0.610546	-8.85145	4.82702e-15	5.14306e-14	23.4227	Not-significant
DSC2	-2.3233	-8.8508	4.84462e-15	5.15863e-14	23.4191	Down-regulated
RAB40AL	0.591094	8.85073	4.84657e-15	5.15863e-14	23.4187	Not-significant
CHRDL2	3.15323	8.85055	4.85162e-15	5.16138e-14	23.4176	Up-regulated
FOXJ3	-0.590557	-8.8502	4.86111e-15	5.16883e-14	23.4157	Not-significant
C2orf81	0.474515	8.84837	4.91145e-15	5.2197e-14	23.4055	Not-significant
ANGPT2	1.53177	8.84285	5.06653e-15	5.38177e-14	23.3747	Up-regulated
TRAPPC6B	-0.747855	-8.84226	5.08336e-15	5.39689e-14	23.3714	Not-significant
HDHD2	-0.846689	-8.8412	5.11384e-15	5.42649e-14	23.3655	Not-significant
TMEM120A	-1.01489	-8.84089	5.12265e-15	5.43308e-14	23.3638	Down-regulated
TMEM86A	0.601576	8.8393	5.16885e-15	5.47929e-14	23.3549	Not-significant
LOC105379752	1.17236	8.83843	5.19393e-15	5.50309e-14	23.3501	Up-regulated
CCDC77	-0.847072	-8.83762	5.21791e-15	5.52568e-14	23.3456	Not-significant
STK32B	-1.0938	-8.83699	5.23628e-15	5.54233e-14	23.3421	Down-regulated
SELENOM	1.70279	8.83447	5.31113e-15	5.6187e-14	23.328	Up-regulated
GALE	-1.97658	-8.83414	5.321e-15	5.62629e-14	23.3262	Down-regulated
LOC101928725	-0.512524	-8.83026	5.4385e-15	5.74761e-14	23.3046	Not-significant
LOXL2	1.50117	8.82987	5.45055e-15	5.75743e-14	23.3024	Up-regulated
PMEPA1	1.61937	8.82964	5.4576e-15	5.76196e-14	23.3011	Up-regulated
DERA	-0.845963	-8.82776	5.51551e-15	5.82016e-14	23.2906	Not-significant
TECPR1	-0.708562	-8.82599	5.57071e-15	5.87544e-14	23.2808	Not-significant
TIE1	1.98533	8.8254	5.58933e-15	5.89209e-14	23.2775	Up-regulated
H2AJ	-0.742892	-8.81981	5.76776e-15	6.07713e-14	23.2464	Not-significant
ZNF573	-1.16265	-8.81921	5.78728e-15	6.09462e-14	23.243	Down-regulated
PCDHB12	0.719453	8.81784	5.83204e-15	6.13865e-14	23.2354	Not-significant
RBBP4	-0.853498	-8.81647	5.87738e-15	6.18325e-14	23.2277	Not-significant
ANKRD13C	-0.801015	-8.81621	5.88585e-15	6.18904e-14	23.2263	Not-significant
ZNF391	0.472644	8.81348	5.97701e-15	6.28174e-14	23.2111	Not-significant
FAM83E	-1.51887	-8.80988	6.09925e-15	6.40697e-14	23.191	Down-regulated
SCG5	-2.31502	-8.80927	6.12003e-15	6.42557e-14	23.1877	Down-regulated
ACADS	-0.949846	-8.8091	6.12589e-15	6.42848e-14	23.1867	Down-regulated
CMAS	-1.27358	-8.80626	6.22451e-15	6.52551e-14	23.1709	Down-regulated
TAB3	-0.892904	-8.80618	6.22739e-15	6.52551e-14	23.1705	Not-significant
LRRC25	0.831888	8.80617	6.22773e-15	6.52551e-14	23.1704	Not-significant
MIOS-DT	-1.0406	-8.80549	6.25164e-15	6.54727e-14	23.1666	Down-regulated
ACD	0.857483	8.8049	6.2723e-15	6.56273e-14	23.1633	Not-significant
CRACR2A	-1.4974	-8.80489	6.27269e-15	6.56273e-14	23.1633	Down-regulated
ERVK3-1	-0.838927	-8.80446	6.2881e-15	6.57556e-14	23.1608	Not-significant
ETAA1	-0.693416	-8.80148	6.39427e-15	6.68323e-14	23.1443	Not-significant
CRYBB2P1	-0.518099	-8.80098	6.41218e-15	6.6986e-14	23.1415	Not-significant
PLPP6	-1.09389	-8.79984	6.45338e-15	6.73826e-14	23.1352	Down-regulated
[truncated: 18,865 more rows]
